# Supplementary material for: On the Ambiphilic Reactivity of Geometrically Constrained Phosphorus(III) and Arsenic(III) Compounds: Insights into Their Interaction with Ionic Substrates
Source: PubMed Central journal article supplement (PMC5095867; doi:10.1002/chem.201603135), 2016-09-15
Supplement: CHEM-22-15712-s001.pdf [file CHEM-22-15712-s001.pdf]

# CHEMISTRY

## A **European** Journal

### Supporting Information

#### **On the Ambiphilic Reactivity of Geometrically Constrained Phosphorus(III) and Arsenic(III) Compounds: Insights into Their Interaction with Ionic Substrates**

Thomas P. Robinson, Siu-Kwan Lo, Daniel De Rosa, Simon Aldridge, and Jose M. Goicoechea<sup>\*[a]</sup>

chem\_201603135\_sm\_miscellaneous\_information.pdf

*Supporting Information*

**CONTENTS:**

- 1. Single crystal X-ray diffraction data**
- 2. Computational details**
- 3. NMR spectra**
- 4. MS spectra**

## 1. Single crystal X-ray diffraction data

**Table S1.** Selected X-ray data collection and refinement parameters for **1b**, [K(2,2,2-crypt)][**2a**] $\cdot$ 1.5tol and [K(18-crown-6)][**2b**] $\cdot$ THF.

|                                                  | <b>1b</b>                                         | [K(2,2,2-crypt)][ <b>2a</b> ] $\cdot$ 1.5tol                       | [K(18-crown-6)][ <b>2b</b> ] $\cdot$ THF            |
|--------------------------------------------------|---------------------------------------------------|--------------------------------------------------------------------|-----------------------------------------------------|
| Formula                                          | C <sub>28</sub> H <sub>40</sub> AsNO <sub>2</sub> | C <sub>60.5</sub> H <sub>97</sub> KN <sub>3</sub> O <sub>9</sub> P | C <sub>48</sub> H <sub>81</sub> AsKNO <sub>10</sub> |
| CCDC depository number                           | 1489274                                           | 1489275                                                            | 1489276                                             |
| Fw [g mol <sup>-1</sup> ]                        | 497.53                                            | 1080.48                                                            | 946.15                                              |
| crystal system                                   | tetragonal                                        | monoclinic                                                         | monoclinic                                          |
| space group                                      | <i>I</i> -4                                       | <i>P</i> 2 <sub>1</sub> / <i>c</i>                                 | <i>P</i> 2 <sub>1</sub> / <i>c</i>                  |
| <i>a</i> (Å)                                     | 13.7548(19)                                       | 14.3925(1)                                                         | 14.6275(1)                                          |
| <i>b</i> (Å)                                     | 13.7548(19)                                       | 17.5650(1)                                                         | 21.8125(1)                                          |
| <i>c</i> (Å)                                     | 28.807(6)                                         | 25.2124(2)                                                         | 17.2391(1)                                          |
| $\alpha$ (°)                                     |                                                   |                                                                    |                                                     |
| $\beta$ (°)                                      |                                                   | 102.3250(10)                                                       | 113.433(1)                                          |
| $\gamma$ (°)                                     |                                                   |                                                                    |                                                     |
| <i>V</i> (Å <sup>3</sup> )                       | 5450.1(19)                                        | 6226.90(8)                                                         | 5046.71(6)                                          |
| <i>Z</i>                                         | 8                                                 | 4                                                                  | 4                                                   |
| radiation, $\lambda$ (Å)                         | Cu K $\alpha$ (1.54178)                           | Cu K $\alpha$ (1.54178)                                            | Cu K $\alpha$ (1.54178)                             |
| <i>T</i> (K)                                     | 150(2)                                            | 150(2)                                                             | 150(2)                                              |
| $\rho_{\text{calc}}$ (g cm <sup>-3</sup> )       | 1.213                                             | 1.153                                                              | 1.245                                               |
| $\mu$ (mm <sup>-1</sup> )                        | 1.270                                             | 1.416                                                              | 2.082                                               |
| reflections collected                            | 6126                                              | 82613                                                              | 55837                                               |
| independent reflections                          | 6111                                              | 12957                                                              | 10494                                               |
| parameters                                       | 318                                               | 709                                                                | 6.42                                                |
| R(int)                                           | 0.0242                                            | 0.0293                                                             | 0.0272                                              |
| R1/wR2, <sup>[a]</sup> I $\geq$ 2 $\sigma$ I (%) | 3.90/8.95                                         | 5.55/16.04                                                         | 2.79/7.33                                           |
| R1/wR2, <sup>[a]</sup> all data (%)              | 4.54/9.28                                         | 6.15/16.76                                                         | 2.96/7.47                                           |
| GOF                                              | 1.028                                             | 1.035                                                              | 1.030                                               |

<sup>[a]</sup> R1 =  $[\sum||F_o| - |F_c||]/\sum|F_o|$ ; wR2 =  $\{[\sum w[(F_o)^2 - (F_c)^2]^2]/[\sum w(F_o)^2]\}^{1/2}$ ; w =  $[\sigma^2(F_o)^2 + (AP)^2 + BP]^{-1}$ , where P =  $[(F_o)^2 + 2(F_c)^2]/3$  and the A and B values are 0.0517 and 5.72 for **1b**, 0.0979 and 3.70 for [K(2,2,2-crypt)][**2a**] $\cdot$ 1.5tol, and 0.0384 and 2.27 for [K(18-crown-6)][**2b**] $\cdot$ THF.

**Table S2.** Selected X-ray data collection and refinement parameters for [K(18-crown-6)][**3a**] $\cdot$ 0.5tol $\cdot$ 0.5pent, [K(2,2,2-crypt)][**3b**], **4a** and **5a**.

|                                                  | [K(18-crown-6)]<br>[ <b>3a</b> ] $\cdot$ 0.5tol $\cdot$ 0.5pent  | [K(2,2,2-crypt)][ <b>3b</b> ]                                    | <b>4a</b>                                         | <b>5a</b>                                         |
|--------------------------------------------------|------------------------------------------------------------------|------------------------------------------------------------------|---------------------------------------------------|---------------------------------------------------|
| Formula                                          | C <sub>58</sub> H <sub>84</sub> KN <sub>2</sub> O <sub>8</sub> P | C <sub>58</sub> H <sub>86</sub> AsKN <sub>4</sub> O <sub>8</sub> | C <sub>32</sub> H <sub>50</sub> NO <sub>3</sub> P | C <sub>39</sub> H <sub>56</sub> NO <sub>3</sub> P |
| CCDC depository number                           | 1489277                                                          | 1489278                                                          | 1489279                                           | 1489280                                           |
| Fw [g mol <sup>-1</sup> ]                        | 1007.34                                                          | 1081.32                                                          | 527.70                                            | 617.81                                            |
| crystal system                                   | monoclinic                                                       | orthorhombic                                                     | monoclinic                                        | monoclinic                                        |
| space group                                      | <i>Ia</i>                                                        | <i>Pna2</i> <sub>1</sub>                                         | <i>P2</i> <sub>1</sub> / <i>c</i>                 | <i>P2</i> <sub>1</sub> / <i>c</i>                 |
| <i>a</i> (Å)                                     | 16.1272(2)                                                       | 30.0623(2)                                                       | 10.4282(1)                                        | 11.4051(3)                                        |
| <i>b</i> (Å)                                     | 18.4364(2)                                                       | 10.6173(1)                                                       | 29.6821(2)                                        | 16.7186(5)                                        |
| <i>c</i> (Å)                                     | 20.9814(6)                                                       | 18.4922(1)                                                       | 20.9711(2)                                        | 19.5555(5)                                        |
| $\alpha$ (°)                                     |                                                                  |                                                                  |                                                   |                                                   |
| $\beta$ (°)                                      | 110.656(2)                                                       |                                                                  | 102.014(1)                                        | 95.679(2)                                         |
| $\gamma$ (°)                                     |                                                                  |                                                                  |                                                   |                                                   |
| <i>V</i> (Å <sup>3</sup> )                       | 5837.3(2)                                                        | 5902.35(8)                                                       | 6349.02(10)                                       | 3710.49(18)                                       |
| <i>Z</i>                                         | 4                                                                | 4                                                                | 8                                                 | 4                                                 |
| radiation, $\lambda$ (Å)                         | Cu K $\alpha$ (1.54178)                                          | Cu K $\alpha$ (1.54178)                                          | Cu K $\alpha$ (1.54178)                           | Cu K $\alpha$ (1.54178)                           |
| <i>T</i> (K)                                     | 150(2)                                                           | 150(2)                                                           | 150(2)                                            | 150(2)                                            |
| $\rho_{\text{calc}}$ (g cm <sup>-3</sup> )       | 1.146                                                            | 1.217                                                            | 1.104                                             | 1.106                                             |
| $\mu$ (mm <sup>-1</sup> )                        | 1.461                                                            | 1.836                                                            | 0.992                                             | 0.917                                             |
| reflections collected                            | 32544                                                            | 71276                                                            | 71331                                             | 34941                                             |
| independent reflections                          | 10556                                                            | 11961                                                            | 13210                                             | 7701                                              |
| parameters                                       | 713                                                              | 661                                                              | 697                                               |                                                   |
| R(int)                                           | 0.0243                                                           | 0.0322                                                           | 0.0255                                            | 0.0264                                            |
| R1/wR2, <sup>[a]</sup> I $\geq$ 2 $\sigma$ I (%) | 3.45/9.39                                                        | 3.02/7.88                                                        | 3.77/10.12                                        | 3.81/10.13                                        |
| R1/wR2, <sup>[a]</sup> all data (%)              | 3.55/9.56                                                        | 3.04/7.92                                                        | 4.28/10.58                                        | 4.31/10.61                                        |
| GOF                                              | 1.006                                                            | 1.045                                                            | 1.031                                             | 1.034                                             |

<sup>[a]</sup> R1 =  $[\sum||F_o| - |F_c||]/\sum|F_o|$ ; wR2 =  $\{[\sum w[(F_o)^2 - (F_c)^2]^2]/[\sum w(F_o)^2]\}^{1/2}$ ; w =  $[\sigma^2(F_o)^2 + (AP)^2 + BP]^{-1}$ , where P =  $[(F_o)^2 + 2(F_c)^2]/3$  and the A and B values are 0.0724 and 1.14 for [K(18-crown-6)][**3a**] $\cdot$ 0.5tol $\cdot$ 0.5pent, 0.0610 and 0.71 for [K(2,2,2-crypt)][**3b**], 0.0588 and 1.98 for **4a**, and 0.0560 and 1.23 for **5a**.

**Table S3.** Selected X-ray data collection and refinement parameters for [6a][OTf]·HOTf, [6b][OTf]·0.5hex and [7a][OTf].

|                                                  | [6a][OTf]·HOTf                                                                 | [6b][OTf]·0.5hex                                                   | [7a][OTf]                                                         |
|--------------------------------------------------|--------------------------------------------------------------------------------|--------------------------------------------------------------------|-------------------------------------------------------------------|
| Formula                                          | C <sub>30</sub> H <sub>42</sub> F <sub>6</sub> NO <sub>8</sub> PS <sub>2</sub> | C <sub>32</sub> H <sub>48</sub> AsF <sub>3</sub> NO <sub>5</sub> S | C <sub>30</sub> H <sub>43</sub> F <sub>3</sub> NO <sub>5</sub> PS |
| CCDC depository number                           | 1489281                                                                        | 1489282                                                            | 1489283                                                           |
| Fw [g mol <sup>-1</sup> ]                        | 753.73                                                                         | 690.69                                                             | 617.68                                                            |
| crystal system                                   | monoclinic                                                                     | triclinic                                                          | monoclinic                                                        |
| space group                                      | <i>P</i> 2 <sub>1</sub> / <i>c</i>                                             | <i>P</i> -1                                                        | <i>P</i> 2 <sub>1</sub> / <i>n</i>                                |
| <i>a</i> (Å)                                     | 10.9709(1)                                                                     | 13.9248(4)                                                         | 15.7666(2)                                                        |
| <i>b</i> (Å)                                     | 24.3831(4)                                                                     | 15.1784(4)                                                         | 11.0178(1)                                                        |
| <i>c</i> (Å)                                     | 14.2349(3)                                                                     | 19.1969(4)                                                         | 18.5524(2)                                                        |
| $\alpha$ (°)                                     |                                                                                | 110.964(2)                                                         |                                                                   |
| $\beta$ (°)                                      | 96.846(2)                                                                      | 98.355(2)                                                          | 96.478(1)                                                         |
| $\gamma$ (°)                                     |                                                                                | 105.897(2)                                                         |                                                                   |
| <i>V</i> (Å <sup>3</sup> )                       | 3780.75(11)                                                                    | 3507.63(17)                                                        | 3202.22(6)                                                        |
| <i>Z</i>                                         | 4                                                                              | 4                                                                  | 4                                                                 |
| radiation, $\lambda$ (Å)                         | Cu K $\alpha$ (1.54178)                                                        | Cu K $\alpha$ (1.54178)                                            | Cu K $\alpha$ (1.54178)                                           |
| <i>T</i> (K)                                     | 150(2)                                                                         | 150(2)                                                             | 150(2)                                                            |
| $\rho_{\text{calc}}$ (g cm <sup>-3</sup> )       | 1.324                                                                          | 1.308                                                              | 1.281                                                             |
| $\mu$ (mm <sup>-1</sup> )                        | 2.342                                                                          | 2.321                                                              | 1.844                                                             |
| reflections collected                            | 42493                                                                          | 38893                                                              | 18595                                                             |
| independent reflections                          | 7858                                                                           | 14480                                                              | 6626                                                              |
| parameters                                       | 441                                                                            | 839                                                                | 370                                                               |
| R(int)                                           | 0.0392                                                                         | 0.0231                                                             | 0.0163                                                            |
| R1/wR2, <sup>[a]</sup> I $\geq$ 2 $\sigma$ I (%) | 5.40/13.67                                                                     | 2.71/6.77                                                          | 4.21/11.46                                                        |
| R1/wR2, <sup>[a]</sup> all data (%)              | 6.13/14.44                                                                     | 3.20/7.10                                                          | 4.54/11.84                                                        |
| GOF                                              | 1.065                                                                          | 1.026                                                              | 1.028                                                             |

<sup>[a]</sup> R1 =  $[\sum(|F_o| - |F_c|)] / \sum|F_o|$ ; wR2 =  $\{[\sum w[(F_o)^2 - (F_c)^2]^2] / [\sum w(F_o)^2]\}^{1/2}$ ; w =  $[\sigma^2(F_o)^2 + (AP)^2 + BP]^{-1}$ , where P =  $[(F_o)^2 + 2(F_c)^2] / 3$  and the A and B values are 0.0581 and 3.63 for [6a][OTf]·HOTf, 0.0356 and 1.01 for [6b][OTf]·0.5hex, and 0.0625 and 1.98 for [7a][OTf].

**Table S4.** Selected X-ray data collection and refinement parameters for [7b][OTf], 8a and 9a.

|                                         | [7b][OTf]                                                          | 8a                                                  | 8b                                                  | 9a                                                |
|-----------------------------------------|--------------------------------------------------------------------|-----------------------------------------------------|-----------------------------------------------------|---------------------------------------------------|
| Formula                                 | C <sub>30</sub> H <sub>43</sub> AsF <sub>3</sub> NO <sub>5</sub> S | C <sub>28</sub> H <sub>41</sub> ClNO <sub>2</sub> P | C <sub>28</sub> H <sub>41</sub> AsClNO <sub>2</sub> | C <sub>33</sub> H <sub>52</sub> NO <sub>3</sub> P |
| CCDC depository number                  | 1489284                                                            | 1489285                                             | 1489286                                             | 1489287                                           |
| Fw [g mol <sup>-1</sup> ]               | 661.63                                                             | 490.04                                              | 533.99                                              | 541.72                                            |
| crystal system                          | triclinic                                                          | orthorhombic                                        | orthorhombic                                        | triclinic                                         |
| space group                             | <i>P</i> -1                                                        | <i>Cmc</i> 2 <sub>1</sub>                           | <i>Iba</i> 2                                        | <i>P</i> -1                                       |
| <i>a</i> (Å)                            | 10.7560(2)                                                         | 9.5644(3)                                           | 19.8430(3)                                          | 5.8986(2)                                         |
| <i>b</i> (Å)                            | 12.9728(3)                                                         | 26.5541(6)                                          | 28.1484(4)                                          | 12.8549(6)                                        |
| <i>c</i> (Å)                            | 12.9972(3)                                                         | 11.0137(3)                                          | 10.2974(1)                                          | 22.4765(10)                                       |
| α (°)                                   | 77.253(2)                                                          |                                                     |                                                     | 79.311(4)                                         |
| β (°)                                   | 76.411(2)                                                          |                                                     |                                                     | 83.904(4)                                         |
| γ (°)                                   | 73.096(2)                                                          |                                                     |                                                     | 79.925(4)                                         |
| <i>V</i> (Å <sup>3</sup> )              | 1663.86(7)                                                         | 2797.19(13)                                         | 5751.60(13)                                         | 1644.11(12)                                       |
| <i>Z</i>                                | 2                                                                  | 4                                                   | 8                                                   | 2                                                 |
| radiation, λ (Å)                        | Cu Kα (1.54178)                                                    | Cu Kα (1.54178)                                     | Cu Kα (1.54178)                                     | Cu Kα (1.54178)                                   |
| <i>T</i> (K)                            | 150(2)                                                             | 150(2)                                              | 150(2)                                              | 150(2)                                            |
| ρ <sub>calc</sub> (g cm <sup>-3</sup> ) | 1.321                                                              | 1.164                                               | 1.233                                               | 1.094                                             |
| μ (mm <sup>-1</sup> )                   | 2.425                                                              | 1.923                                               | 2.623                                               | 0.969                                             |
| reflections collected                   | 30746                                                              | 9673                                                | 28596                                               | 14726                                             |
| independent reflections                 | 6896                                                               | 3007                                                | 5313                                                | 6781                                              |
| parameters                              | 370                                                                | 210                                                 | 309                                                 | 344                                               |
| R(int)                                  | 0.0149                                                             | 0.0342                                              | 0.0303                                              | 0.0285                                            |
| R1/wR2, <sup>[a]</sup> I ≥ 2σI (%)      | 2.31/6.03                                                          | 5.08/13.59                                          | 2.26/5.80                                           | 3.80/9.32                                         |
| R1/wR2, <sup>[a]</sup> all data (%)     | 2.37/6.08                                                          | 5.20/13.74                                          | 2.36/5.89                                           | 4.76/9.91                                         |
| GOF                                     | 1.016                                                              | 1.062                                               | 1.040                                               | 1.020                                             |

<sup>[a]</sup> R1 =  $[\sum||F_o| - |F_c||]/\sum|F_o|$ ; wR2 =  $\{[\sum w[(F_o)^2 - (F_c)^2]^2]/[\sum w(F_o)^2]\}^{1/2}$ ; w =  $[\sigma^2(F_o)^2 + (AP)^2 + BP]^{-1}$ , where P =  $[(F_o)^2 + 2(F_c)^2]/3$  and the A and B values are 0.0328 and 0.77 for [7b][OTf], 0.0740 and 2.74 for 8a, 0.0349 and 2.14 for 8b, and 0.0522 and 0.19 for 9a.

## 2. Computational details

All geometry optimizations were performed using the Amsterdam Density Functional package (ADF2014.01).<sup>[1]</sup> An TZP Slater-type basis set of triple- $\zeta$  quality, extended with one polarization function, was used to describe all phosphorus arsenic, nitrogen, oxygen and chlorine atoms, while a DZ basis set was used for all remaining atoms. Geometry optimizations were performed using the Becke88 exchange functional with Perdew86 local correlation functional.<sup>[2,3]</sup> The Grimme3 empirical dispersion correction was applied to all calculations.<sup>[4]</sup> All structures were optimized using the gradient algorithm of Versluis and Ziegler.<sup>[5]</sup>

### Cartesian coordinates [ $\text{\AA}$ ] for the optimized computed geometry of 1a (planar).

| Atom  | <i>x</i>  | <i>y</i>  | <i>z</i>  |
|-------|-----------|-----------|-----------|
| 1. P  | 0.048714  | -0.006222 | -0.221172 |
| 2. N  | -1.704141 | 0.228290  | -0.289844 |
| 3. O  | -0.340528 | -1.781444 | -0.318433 |
| 4. O  | 0.125613  | 1.809858  | -0.050494 |
| 5. C  | -2.487393 | -0.933942 | -0.285199 |
| 6. C  | -3.887568 | -1.069332 | -0.180093 |
| 7. H  | -4.516386 | -0.202126 | -0.046233 |
| 8. C  | -4.457865 | -2.345533 | -0.186506 |
| 9. C  | -3.605970 | -3.480003 | -0.271332 |
| 10. H | -4.065693 | -4.465296 | -0.279745 |
| 11. C | -2.208048 | -3.396368 | -0.319913 |
| 12. C | -1.655033 | -2.085127 | -0.321756 |
| 13. C | -2.154929 | 1.555212  | -0.303073 |
| 14. C | -1.062355 | 2.444576  | -0.115463 |
| 15. C | -1.263091 | 3.852028  | -0.043843 |
| 16. H | -2.773921 | 5.368985  | -0.149831 |
| 17. C | -2.581283 | 4.300218  | -0.204590 |
| 18. C | -3.679437 | 3.435643  | -0.464852 |
| 19. H | -4.264209 | 1.391640  | -0.787810 |
| 20. C | -3.455132 | 2.056561  | -0.523479 |
| 21. C | -0.073419 | 4.802001  | 0.180443  |
| 22. C | -0.523854 | 6.282536  | 0.262494  |
| 23. H | 0.360870  | 6.918526  | 0.429353  |
| 24. H | -1.000216 | 6.616724  | -0.674189 |
| 25. H | -1.218996 | 6.450806  | 1.102123  |
| 26. C | 0.632062  | 4.434505  | 1.518538  |
| 27. H | -0.080366 | 4.516313  | 2.356339  |
| 28. H | 1.469849  | 5.127916  | 1.701608  |
| 29. H | 1.027420  | 3.409371  | 1.494527  |

|       |           |           |           |
|-------|-----------|-----------|-----------|
| 30. C | 0.917363  | 4.658298  | -1.012896 |
| 31. H | 0.403626  | 4.891224  | -1.960415 |
| 32. H | 1.758707  | 5.360526  | -0.887761 |
| 33. H | 1.320380  | 3.637857  | -1.075906 |
| 34. C | -5.082984 | 4.040271  | -0.682571 |
| 35. C | -5.047536 | 4.978158  | -1.924164 |
| 36. H | -6.048039 | 5.403097  | -2.109986 |
| 37. H | -4.343411 | 5.813036  | -1.782179 |
| 38. H | -4.730767 | 4.414653  | -2.816746 |
| 39. C | -6.159321 | 2.951688  | -0.928382 |
| 40. H | -5.945179 | 2.366927  | -1.837893 |
| 41. H | -7.140375 | 3.433740  | -1.069612 |
| 42. H | -6.247029 | 2.265896  | -0.069292 |
| 43. C | -5.492003 | 4.848587  | 0.582318  |
| 44. H | -4.809408 | 5.692914  | 0.765433  |
| 45. H | -6.509125 | 5.256008  | 0.459043  |
| 46. H | -5.476155 | 4.198591  | 1.472138  |
| 47. C | -1.293368 | -4.633393 | -0.352849 |
| 48. C | -0.395771 | -4.630235 | 0.919966  |
| 49. H | 0.239684  | -5.531355 | 0.931970  |
| 50. H | 0.254069  | -3.744674 | 0.947527  |
| 51. H | -1.024753 | -4.631537 | 1.825475  |
| 52. C | -2.105023 | -5.952680 | -0.369347 |
| 53. H | -2.722820 | -6.063142 | 0.537278  |
| 54. H | -1.405337 | -6.803529 | -0.399917 |
| 55. H | -2.752076 | -6.021310 | -1.259590 |
| 56. C | -0.415259 | -4.586773 | -1.637350 |
| 57. H | 0.230534  | -3.697937 | -1.648507 |
| 58. H | 0.224549  | -5.483551 | -1.685441 |
| 59. H | -1.057205 | -4.564877 | -2.533392 |
| 60. C | -5.985647 | -2.552128 | -0.101937 |
| 61. C | -6.755970 | -1.209321 | -0.049140 |
| 62. H | -7.838554 | -1.411592 | -0.003695 |
| 63. H | -6.491558 | -0.623709 | 0.846143  |
| 64. H | -6.569204 | -0.599811 | -0.948402 |
| 65. C | -6.459280 | -3.332359 | -1.362007 |
| 66. H | -6.173297 | -2.787459 | -2.276131 |
| 67. H | -7.555528 | -3.450445 | -1.347096 |
| 68. H | -6.012106 | -4.336983 | -1.411250 |
| 69. C | -6.324585 | -3.359932 | 1.183720  |
| 70. H | -5.970129 | -2.819268 | 2.076109  |
| 71. H | -7.414602 | -3.505290 | 1.266706  |
| 72. H | -5.848722 | -4.352734 | 1.176895  |

TOTAL BONDING ENERGY (kJ mol<sup>-1</sup>): -39837.60

**Cartesian coordinates [Å] for the optimized computed geometry of 1a (pyramidal).**

| Atom | x        | y         | z         |
|------|----------|-----------|-----------|
| 1. P | 0.048445 | 0.090935  | -0.163272 |
| 2. N | 0.012635 | -1.698565 | -0.097645 |
| 3. O | 1.486024 | 0.087967  | -1.075273 |



|       |           |           |           |
|-------|-----------|-----------|-----------|
| 4. O  | -1.376341 | 0.144718  | -1.098104 |
| 5. C  | 1.993639  | -1.203981 | -1.290076 |
| 6. C  | 3.184488  | -1.489912 | -1.985352 |
| 7. C  | 3.538091  | -2.855385 | -2.053314 |
| 8. H  | 4.451818  | -3.122169 | -2.578343 |
| 9. C  | 2.776760  | -3.892151 | -1.466452 |
| 10. C | 1.604594  | -3.552591 | -0.765920 |
| 11. H | 1.004929  | -4.309228 | -0.271876 |
| 12. C | 1.214102  | -2.210831 | -0.697709 |
| 13. C | 4.034429  | -0.369318 | -2.612637 |
| 14. C | 5.285688  | -0.928941 | -3.334638 |
| 15. H | 5.011017  | -1.609976 | -4.156934 |
| 16. H | 5.957240  | -1.455685 | -2.636656 |
| 17. H | 5.852310  | -0.090509 | -3.771357 |
| 18. C | 4.514886  | 0.593590  | -1.487887 |
| 19. H | 3.667479  | 1.078663  | -0.983849 |
| 20. H | 5.159728  | 1.378799  | -1.916514 |
| 21. H | 5.094720  | 0.035187  | -0.734509 |
| 22. C | 3.175879  | 0.401173  | -3.657609 |
| 23. H | 2.298821  | 0.871347  | -3.191258 |
| 24. H | 2.824298  | -0.290359 | -4.440873 |
| 25. H | 3.782202  | 1.191161  | -4.131275 |
| 26. C | 3.254530  | -5.355069 | -1.601296 |
| 27. C | 3.359564  | -5.720023 | -3.110293 |
| 28. H | 3.660309  | -6.774597 | -3.227594 |
| 29. H | 4.103009  | -5.095888 | -3.629870 |
| 30. H | 2.385597  | -5.572060 | -3.604300 |
| 31. C | 2.275046  | -6.355162 | -0.936798 |
| 32. H | 2.181981  | -6.176695 | 0.147080  |
| 33. H | 2.654495  | -7.381125 | -1.072724 |
| 34. H | 1.276200  | -6.305825 | -1.400300 |
| 35. C | 4.643621  | -5.504899 | -0.918190 |
| 36. H | 4.577902  | -5.217186 | 0.143653  |
| 37. H | 5.401031  | -4.865244 | -1.397350 |
| 38. H | 4.990351  | -6.549960 | -0.981878 |
| 39. C | -1.947866 | -1.123381 | -1.292912 |
| 40. C | -3.149926 | -1.361448 | -1.979485 |
| 41. C | -3.573552 | -2.713131 | -2.029605 |
| 42. H | -4.497504 | -2.935853 | -2.553270 |
| 43. C | -2.866280 | -3.771744 | -1.426003 |
| 44. C | -1.676985 | -3.475811 | -0.724615 |
| 45. H | -1.121820 | -4.257738 | -0.214004 |
| 46. C | -1.216639 | -2.160651 | -0.681590 |
| 47. C | -3.948062 | -0.212387 | -2.624592 |
| 48. C | -3.055496 | 0.499148  | -3.682692 |
| 49. H | -2.157364 | 0.936408  | -3.224457 |
| 50. H | -3.624948 | 1.307307  | -4.171421 |
| 51. H | -2.736632 | -0.222318 | -4.452869 |
| 52. C | -4.381937 | 0.790342  | -1.515336 |
| 53. H | -3.512027 | 1.241175  | -1.017948 |

|                                                         |           |           |           |
|---------------------------------------------------------|-----------|-----------|-----------|
| 54. H                                                   | -4.988506 | 0.272320  | -0.754318 |
| 55. H                                                   | -4.988296 | 1.598784  | -1.956795 |
| 56. C                                                   | -5.225661 | -0.723454 | -3.336737 |
| 57. H                                                   | -5.752164 | 0.134127  | -3.786599 |
| 58. H                                                   | -5.920822 | -1.206892 | -2.630761 |
| 59. H                                                   | -4.985270 | -1.429895 | -4.148156 |
| 60. C                                                   | -3.335676 | -5.241327 | -1.503816 |
| 61. C                                                   | -2.220510 | -6.090718 | -2.181973 |
| 62. H                                                   | -1.290043 | -6.082256 | -1.593909 |
| 63. H                                                   | -1.992448 | -5.689655 | -3.182705 |
| 64. H                                                   | -2.547363 | -7.139087 | -2.284009 |
| 65. C                                                   | -3.604065 | -5.773103 | -0.066472 |
| 66. H                                                   | -4.366171 | -5.152663 | 0.432352  |
| 67. H                                                   | -2.692918 | -5.753391 | 0.551590  |
| 68. H                                                   | -3.964845 | -6.814593 | -0.106333 |
| 69. C                                                   | -4.635278 | -5.401492 | -2.331096 |
| 70. H                                                   | -5.474045 | -4.846491 | -1.880451 |
| 71. H                                                   | -4.918809 | -6.466378 | -2.361057 |
| 72. H                                                   | -4.497249 | -5.063346 | -3.371008 |
| TOTAL BONDING ENERGY (kJ mol <sup>-1</sup> ): -39828.16 |           |           |           |

**Cartesian coordinates [Å] for the optimized computed geometry of 1b.**

| Atom  | x         | y         | z         |
|-------|-----------|-----------|-----------|
| 1. As | 0.109513  | -0.000995 | -0.025517 |
| 2. N  | -1.796976 | -0.061919 | -0.138202 |
| 3. O  | -0.238878 | 1.942651  | -0.224868 |
| 4. O  | -0.132828 | -1.964272 | 0.106839  |
| 5. C  | -1.535009 | 2.269114  | -0.238432 |
| 6. C  | -2.024257 | 3.612117  | -0.311347 |
| 7. C  | -3.408813 | 3.787624  | -0.231597 |
| 8. H  | -3.806884 | 4.797473  | -0.291942 |
| 9. C  | -4.327416 | 2.717471  | -0.040788 |
| 10. C | -3.836208 | 1.413508  | 0.019193  |
| 11. H | -4.504518 | 0.595428  | 0.249464  |
| 12. C | -2.450566 | 1.169890  | -0.139818 |
| 13. C | -1.044121 | 4.791091  | -0.458237 |
| 14. C | -1.783414 | 6.148915  | -0.566717 |
| 15. H | -2.451210 | 6.179875  | -1.443743 |
| 16. H | -1.038358 | 6.951901  | -0.687911 |
| 17. H | -2.366772 | 6.372893  | 0.341524  |
| 18. C | -0.202264 | 4.599685  | -1.753814 |
| 19. H | -0.868426 | 4.540566  | -2.630270 |
| 20. H | 0.398298  | 3.681155  | -1.709390 |
| 21. H | 0.479204  | 5.455993  | -1.888321 |
| 22. C | -0.117981 | 4.843164  | 0.792524  |
| 23. H | 0.487017  | 3.930262  | 0.877644  |
| 24. H | -0.725214 | 4.947805  | 1.706798  |
| 25. H | 0.561112  | 5.709281  | 0.720011  |
| 26. C | -5.831557 | 3.031729  | 0.100682  |
| 27. C | -6.057655 | 3.892492  | 1.377263  |

|       |           |           |           |
|-------|-----------|-----------|-----------|
| 28. H | -7.129298 | 4.121990  | 1.498346  |
| 29. H | -5.507101 | 4.845318  | 1.326801  |
| 30. H | -5.709329 | 3.346427  | 2.268736  |
| 31. C | -6.307862 | 3.813128  | -1.158091 |
| 32. H | -7.395491 | 3.987494  | -1.107221 |
| 33. H | -6.083394 | 3.238446  | -2.071509 |
| 34. H | -5.814620 | 4.793949  | -1.242603 |
| 35. C | -6.689144 | 1.745840  | 0.220975  |
| 36. H | -7.752899 | 2.022223  | 0.302150  |
| 37. H | -6.430155 | 1.166144  | 1.121946  |
| 38. H | -6.578235 | 1.102692  | -0.667254 |
| 39. C | -1.397239 | -2.373105 | -0.039053 |
| 40. C | -2.366386 | -1.332187 | -0.221866 |
| 41. C | -3.707998 | -1.659322 | -0.536160 |
| 42. H | -4.402716 | -0.879590 | -0.816158 |
| 43. C | -4.113115 | -2.993900 | -0.561657 |
| 44. C | -3.151145 | -4.008179 | -0.296304 |
| 45. H | -3.484232 | -5.042934 | -0.308170 |
| 46. C | -1.799086 | -3.746436 | -0.054940 |
| 47. C | -0.763034 | -4.863802 | 0.168194  |
| 48. C | -1.416810 | -6.268645 | 0.151883  |
| 49. H | -1.882341 | -6.492181 | -0.822056 |
| 50. H | -2.172197 | -6.376776 | 0.947736  |
| 51. H | -0.637346 | -7.027401 | 0.327913  |
| 52. C | -0.082303 | -4.666939 | 1.553824  |
| 53. H | 0.638032  | -5.481715 | 1.736557  |
| 54. H | -0.841950 | -4.684634 | 2.353001  |
| 55. H | 0.454835  | -3.710120 | 1.603523  |
| 56. C | 0.296328  | -4.811272 | -0.973104 |
| 57. H | -0.197645 | -4.931730 | -1.951700 |
| 58. H | 1.025802  | -5.628608 | -0.844229 |
| 59. H | 0.837960  | -3.855516 | -0.970548 |
| 60. C | -5.566343 | -3.399150 | -0.889441 |
| 61. C | -6.496730 | -2.169037 | -1.041569 |
| 62. H | -6.188139 | -1.524373 | -1.880892 |
| 63. H | -6.524810 | -1.569909 | -0.116319 |
| 64. H | -7.523711 | -2.511637 | -1.250245 |
| 65. C | -6.124816 | -4.282377 | 0.263277  |
| 66. H | -5.570064 | -5.227960 | 0.361615  |
| 67. H | -7.181703 | -4.532390 | 0.071503  |
| 68. H | -6.057908 | -3.744292 | 1.222662  |
| 69. C | -5.581049 | -4.195645 | -2.225387 |
| 70. H | -5.170904 | -3.577473 | -3.040120 |
| 71. H | -6.612152 | -4.487148 | -2.486104 |
| 72. H | -4.972794 | -5.111295 | -2.156394 |

**Cartesian coordinates [Å] for the optimized computed geometry of 2a.**

| <b>Atom</b> | <b>x</b> | <b>y</b>  | <b>z</b>  |
|-------------|----------|-----------|-----------|
| 1. P        | 0.005330 | 0.099222  | -0.197048 |
| 2. N        | 0.109048 | -1.677216 | -0.435153 |

|       |           |           |           |
|-------|-----------|-----------|-----------|
| 3. O  | 1.964363  | 0.022782  | -0.273801 |
| 4. O  | -1.890570 | -0.206960 | -0.350967 |
| 5. O  | -0.031730 | -0.049729 | 1.498204  |
| 6. C  | -0.026458 | 1.115288  | 2.375761  |
| 7. C  | 1.427383  | 1.612081  | 2.540438  |
| 8. H  | 2.066160  | 0.770497  | 2.846902  |
| 9. H  | 1.484004  | 2.412560  | 3.299859  |
| 10. H | 1.808716  | 1.995467  | 1.582317  |
| 11. C | -0.574465 | 0.566008  | 3.712040  |
| 12. H | -1.587318 | 0.166371  | 3.549561  |
| 13. H | -0.609253 | 1.357664  | 4.479971  |
| 14. H | 0.068265  | -0.256007 | 4.064332  |
| 15. C | -0.942474 | 2.250730  | 1.860226  |
| 16. H | -1.957777 | 1.865785  | 1.693580  |
| 17. H | -0.567535 | 2.660547  | 0.909894  |
| 18. H | -0.983317 | 3.065332  | 2.604968  |
| 19. C | 2.416449  | -1.233611 | -0.397626 |
| 20. C | 3.785225  | -1.616903 | -0.466305 |
| 21. C | 4.078849  | -2.986759 | -0.654035 |
| 22. H | 5.122482  | -3.296464 | -0.683407 |
| 23. C | 3.080890  | -3.970390 | -0.816838 |
| 24. C | 1.729347  | -3.568830 | -0.784098 |
| 25. H | 0.940118  | -4.280520 | -0.997989 |
| 26. C | 1.393941  | -2.228840 | -0.522847 |
| 27. C | 4.888427  | -0.544894 | -0.353036 |
| 28. C | 6.312499  | -1.153131 | -0.420715 |
| 29. H | 7.055066  | -0.341086 | -0.327770 |
| 30. H | 6.488335  | -1.664660 | -1.382413 |
| 31. H | 6.485738  | -1.867337 | 0.402150  |
| 32. C | 4.737591  | 0.463102  | -1.530747 |
| 33. H | 5.515150  | 1.246421  | -1.466431 |
| 34. H | 3.745684  | 0.936420  | -1.503790 |
| 35. H | 4.844112  | -0.068445 | -2.491674 |
| 36. C | 4.747069  | 0.200049  | 1.004959  |
| 37. H | 5.532103  | 0.972025  | 1.104858  |
| 38. H | 4.844066  | -0.518261 | 1.836402  |
| 39. H | 3.762539  | 0.678848  | 1.072933  |
| 40. C | 3.486886  | -5.450114 | -1.003781 |
| 41. C | 4.276456  | -5.614349 | -2.334164 |
| 42. H | 5.187932  | -4.995538 | -2.331719 |
| 43. H | 3.650711  | -5.288502 | -3.181118 |
| 44. H | 4.569828  | -6.668930 | -2.487733 |
| 45. C | 4.378447  | -5.896424 | 0.191875  |
| 46. H | 3.841119  | -5.729216 | 1.139708  |
| 47. H | 5.317355  | -5.322292 | 0.230445  |
| 48. H | 4.633309  | -6.968305 | 0.106867  |
| 49. C | 2.257379  | -6.394248 | -1.048656 |
| 50. H | 1.670494  | -6.325423 | -0.118535 |
| 51. H | 2.597225  | -7.438714 | -1.161776 |
| 52. H | 1.598478  | -6.160415 | -1.900413 |

|       |           |           |           |
|-------|-----------|-----------|-----------|
| 53. C | -2.188218 | -1.487266 | -0.046330 |
| 54. C | -3.470146 | -1.986243 | 0.302746  |
| 55. C | -3.569951 | -3.352067 | 0.656799  |
| 56. H | -4.548187 | -3.754208 | 0.915934  |
| 57. C | -2.451950 | -4.210335 | 0.714649  |
| 58. C | -1.187329 | -3.697555 | 0.359542  |
| 59. H | -0.300772 | -4.310964 | 0.462549  |
| 60. C | -1.057433 | -2.363083 | -0.059369 |
| 61. C | -4.688422 | -1.039822 | 0.307866  |
| 62. C | -6.001147 | -1.766994 | 0.694357  |
| 63. H | -5.945231 | -2.186535 | 1.713094  |
| 64. H | -6.235932 | -2.578299 | -0.015317 |
| 65. H | -6.834606 | -1.043225 | 0.670889  |
| 66. C | -4.873125 | -0.430774 | -1.112324 |
| 67. H | -5.738273 | 0.257011  | -1.124992 |
| 68. H | -5.048724 | -1.237529 | -1.843964 |
| 69. H | -3.971458 | 0.121062  | -1.414123 |
| 70. C | -4.442340 | 0.097642  | 1.340903  |
| 71. H | -4.283055 | -0.332727 | 2.343646  |
| 72. H | -5.310054 | 0.781823  | 1.376214  |
| 73. H | -3.546962 | 0.665517  | 1.059555  |
| 74. C | -2.629174 | -5.669318 | 1.195998  |
| 75. C | -3.118115 | -5.664599 | 2.674013  |
| 76. H | -3.229012 | -6.696294 | 3.054825  |
| 77. H | -4.089002 | -5.152145 | 2.767282  |
| 78. H | -2.391069 | -5.124912 | 3.302991  |
| 79. C | -1.306084 | -6.474326 | 1.129168  |
| 80. H | -0.916706 | -6.513296 | 0.099034  |
| 81. H | -1.486253 | -7.509904 | 1.466743  |
| 82. H | -0.534702 | -6.035816 | 1.782572  |
| 83. C | -3.673995 | -6.396049 | 0.300570  |
| 84. H | -3.347679 | -6.367603 | -0.752020 |
| 85. H | -4.661162 | -5.911238 | 0.361115  |
| 86. H | -3.787912 | -7.449822 | 0.613990  |

**Cartesian coordinates [ $\text{\AA}$ ] for the optimized computed geometry of 2b.**

| <b>Atom</b> | <b>x</b>  | <b>y</b>  | <b>z</b>  |
|-------------|-----------|-----------|-----------|
| 1. As       | -0.023323 | 0.241943  | -0.333513 |
| 2. N        | 0.090574  | -1.664856 | -0.574457 |
| 3. O        | 2.022751  | 0.070601  | -0.395900 |
| 4. O        | -2.013645 | -0.188977 | -0.511378 |
| 5. O        | -0.095848 | -0.002676 | 1.521142  |
| 6. C        | -0.040669 | 1.121341  | 2.431761  |
| 7. C        | 1.400207  | 1.683385  | 2.493056  |
| 8. H        | 2.097310  | 0.862867  | 2.717423  |
| 9. H        | 1.488636  | 2.463305  | 3.270680  |
| 10. H       | 1.688577  | 2.114457  | 1.521770  |
| 11. C       | -0.436732 | 0.512902  | 3.799233  |
| 12. H       | -1.451510 | 0.090878  | 3.729034  |
| 13. H       | -0.407386 | 1.274910  | 4.597125  |

|       |           |           |           |
|-------|-----------|-----------|-----------|
| 14. H | 0.258705  | -0.304057 | 4.049239  |
| 15. C | -1.049468 | 2.231747  | 2.043706  |
| 16. H | -2.052850 | 1.795251  | 1.935482  |
| 17. H | -0.769495 | 2.702976  | 1.087485  |
| 18. H | -1.078229 | 3.016020  | 2.821040  |
| 19. C | 2.421117  | -1.210214 | -0.480268 |
| 20. C | 3.785165  | -1.621653 | -0.483971 |
| 21. C | 4.067658  | -2.995985 | -0.639793 |
| 22. H | 5.106383  | -3.320728 | -0.619257 |
| 23. C | 3.062739  | -3.966192 | -0.833860 |
| 24. C | 1.719625  | -3.544505 | -0.854010 |
| 25. H | 0.927737  | -4.247522 | -1.088105 |
| 26. C | 1.383060  | -2.196459 | -0.617259 |
| 27. C | 4.905180  | -0.571136 | -0.325468 |
| 28. C | 6.316905  | -1.212416 | -0.299728 |
| 29. H | 7.070873  | -0.415329 | -0.176187 |
| 30. H | 6.538980  | -1.744772 | -1.240051 |
| 31. H | 6.424983  | -1.914819 | 0.544310  |
| 32. C | 4.848961  | 0.419720  | -1.525758 |
| 33. H | 5.639294  | 1.186297  | -1.426328 |
| 34. H | 3.868604  | 0.915438  | -1.565670 |
| 35. H | 5.001505  | -0.130506 | -2.469964 |
| 36. C | 4.708298  | 0.200663  | 1.011120  |
| 37. H | 5.518060  | 0.939991  | 1.151012  |
| 38. H | 4.720990  | -0.507610 | 1.856746  |
| 39. H | 3.743191  | 0.721746  | 1.009138  |
| 40. C | 3.457532  | -5.450622 | -1.007956 |
| 41. C | 4.258664  | -5.625172 | -2.330256 |
| 42. H | 5.174202  | -5.012369 | -2.320101 |
| 43. H | 3.643720  | -5.296952 | -3.184267 |
| 44. H | 4.545463  | -6.682445 | -2.478101 |
| 45. C | 4.334297  | -5.900975 | 0.196862  |
| 46. H | 3.792727  | -5.722334 | 1.140154  |
| 47. H | 5.281172  | -5.340677 | 0.239343  |
| 48. H | 4.575695  | -6.976568 | 0.118705  |
| 49. C | 2.220604  | -6.383672 | -1.060108 |
| 50. H | 1.626076  | -6.302876 | -0.136206 |
| 51. H | 2.551554  | -7.432168 | -1.163934 |
| 52. H | 1.571925  | -6.149540 | -1.919553 |
| 53. C | -2.233634 | -1.475711 | -0.174302 |
| 54. C | -3.496656 | -1.999214 | 0.217352  |
| 55. C | -3.561809 | -3.351608 | 0.620136  |
| 56. H | -4.526017 | -3.764396 | 0.912451  |
| 57. C | -2.424925 | -4.182384 | 0.688771  |
| 58. C | -1.180695 | -3.652051 | 0.296689  |
| 59. H | -0.278199 | -4.239680 | 0.412674  |
| 60. C | -1.077713 | -2.330435 | -0.173483 |
| 61. C | -4.737499 | -1.080186 | 0.230625  |
| 62. C | -6.022173 | -1.827594 | 0.670424  |
| 63. H | -5.930678 | -2.216744 | 1.698547  |

|       |           |           |           |
|-------|-----------|-----------|-----------|
| 64. H | -6.255743 | -2.663567 | -0.010558 |
| 65. H | -6.872941 | -1.124093 | 0.649058  |
| 66. C | -4.977919 | -0.511997 | -1.198043 |
| 67. H | -5.860655 | 0.153348  | -1.202644 |
| 68. H | -5.153150 | -1.341240 | -1.904423 |
| 69. H | -4.099303 | 0.054466  | -1.537727 |
| 70. C | -4.494223 | 0.087136  | 1.231397  |
| 71. H | -4.296747 | -0.317893 | 2.237881  |
| 72. H | -5.379466 | 0.747863  | 1.275855  |
| 73. H | -3.621712 | 0.671789  | 0.914589  |
| 74. C | -2.561287 | -5.624751 | 1.228278  |
| 75. C | -3.009697 | -5.572684 | 2.717882  |
| 76. H | -3.088202 | -6.591115 | 3.140587  |
| 77. H | -3.988477 | -5.077050 | 2.817873  |
| 78. H | -2.278237 | -4.994018 | 3.305349  |
| 79. C | -1.226356 | -6.408774 | 1.153028  |
| 80. H | -0.864724 | -6.474829 | 0.114481  |
| 81. H | -1.379239 | -7.435716 | 1.528665  |
| 82. H | -0.445761 | -5.936539 | 1.770879  |
| 83. C | -3.616318 | -6.403558 | 0.390434  |
| 84. H | -3.315631 | -6.414942 | -0.670112 |
| 85. H | -4.609469 | -5.932073 | 0.454812  |
| 86. H | -3.705796 | -7.444617 | 0.750687  |

**Cartesian coordinates [ $\text{\AA}$ ] for the optimized computed geometry of 3a.**

| Atom  | <i>x</i>  | <i>y</i>  | <i>z</i>  |
|-------|-----------|-----------|-----------|
| 1. P  | 0.112810  | 0.194695  | -0.256864 |
| 2. O  | -1.757168 | 0.060061  | -0.503655 |
| 3. O  | 1.991840  | -0.048892 | -0.031744 |
| 4. N  | 0.071521  | -1.610022 | -0.216897 |
| 5. N  | -0.110383 | 0.548815  | 1.575559  |
| 6. C  | -2.217504 | -1.207388 | -0.489719 |
| 7. C  | -3.577325 | -1.579441 | -0.586255 |
| 8. C  | -3.887115 | -2.959024 | -0.483309 |
| 9. H  | -4.931255 | -3.257594 | -0.511633 |
| 10. C | -2.896787 | -3.948554 | -0.360353 |
| 11. C | -1.539675 | -3.553844 | -0.341357 |
| 12. H | -0.765967 | -4.312138 | -0.345876 |
| 13. C | -1.196280 | -2.197962 | -0.342609 |
| 14. C | -4.657415 | -0.503118 | -0.818552 |
| 15. C | -4.349264 | 0.226728  | -2.158969 |
| 16. H | -5.118241 | 0.993045  | -2.363772 |
| 17. H | -4.342348 | -0.502682 | -2.986365 |
| 18. H | -3.364079 | 0.712607  | -2.115650 |
| 19. C | -4.659381 | 0.522451  | 0.351424  |
| 20. H | -5.428386 | 1.296601  | 0.175302  |
| 21. H | -3.681356 | 1.015600  | 0.440879  |
| 22. H | -4.893968 | 0.011340  | 1.300536  |
| 23. C | -6.078873 | -1.112991 | -0.920454 |
| 24. H | -6.807021 | -0.302148 | -1.095890 |

|       |           |           |           |
|-------|-----------|-----------|-----------|
| 25. H | -6.366553 | -1.628323 | 0.011354  |
| 26. H | -6.154026 | -1.824152 | -1.760083 |
| 27. C | -3.219669 | -5.452209 | -0.219739 |
| 28. C | -2.628158 | -6.231447 | -1.430102 |
| 29. H | -3.055947 | -5.842308 | -2.369159 |
| 30. H | -2.857205 | -7.309477 | -1.349607 |
| 31. H | -1.534480 | -6.115725 | -1.486002 |
| 32. C | -4.743628 | -5.725789 | -0.167741 |
| 33. H | -5.243364 | -5.394658 | -1.093558 |
| 34. H | -5.209929 | -5.214153 | 0.691211  |
| 35. H | -4.919715 | -6.810633 | -0.057022 |
| 36. C | -2.591591 | -5.984327 | 1.103775  |
| 37. H | -2.957746 | -5.391805 | 1.957972  |
| 38. H | -1.493940 | -5.901604 | 1.090652  |
| 39. H | -2.853572 | -7.046817 | 1.259205  |
| 40. C | 2.295204  | -1.279258 | 0.429284  |
| 41. C | 3.510653  | -1.645314 | 1.055943  |
| 42. C | 3.635013  | -2.978763 | 1.520180  |
| 43. H | 4.574497  | -3.280484 | 1.974621  |
| 44. C | 2.591918  | -3.916947 | 1.418354  |
| 45. C | 1.373393  | -3.514393 | 0.828834  |
| 46. H | 0.530911  | -4.192625 | 0.853713  |
| 47. C | 1.222526  | -2.220922 | 0.316206  |
| 48. C | 4.623788  | -0.596099 | 1.254466  |
| 49. C | 5.030463  | -0.002103 | -0.125968 |
| 50. H | 4.171476  | 0.490227  | -0.602792 |
| 51. H | 5.385084  | -0.808893 | -0.790286 |
| 52. H | 5.841525  | 0.736943  | 0.003971  |
| 53. C | 5.894026  | -1.205718 | 1.903095  |
| 54. H | 6.324791  | -2.005658 | 1.276263  |
| 55. H | 5.683531  | -1.610227 | 2.907428  |
| 56. H | 6.654062  | -0.413117 | 2.014016  |
| 57. C | 4.099616  | 0.535393  | 2.186132  |
| 58. H | 3.216931  | 1.024657  | 1.755712  |
| 59. H | 4.879963  | 1.303001  | 2.335549  |
| 60. H | 3.823647  | 0.124554  | 3.171657  |
| 61. C | 2.723074  | -5.380456 | 1.903555  |
| 62. C | 2.404700  | -6.338680 | 0.717036  |
| 63. H | 1.361188  | -6.231896 | 0.382839  |
| 64. H | 2.562864  | -7.390787 | 1.014986  |
| 65. H | 3.058038  | -6.103443 | -0.138960 |
| 66. C | 4.151374  | -5.708025 | 2.409417  |
| 67. H | 4.194538  | -6.763090 | 2.732294  |
| 68. H | 4.425852  | -5.080172 | 3.272959  |
| 69. H | 4.899250  | -5.561779 | 1.612845  |
| 70. C | 1.726528  | -5.656394 | 3.065844  |
| 71. H | 0.696096  | -5.385893 | 2.787550  |
| 72. H | 2.006336  | -5.062392 | 3.950033  |
| 73. H | 1.744671  | -6.726283 | 3.342338  |
| 74. C | 0.607627  | 1.604605  | 2.142703  |



|       |           |           |          |
|-------|-----------|-----------|----------|
| 75. C | 0.782550  | 1.730575  | 3.551594 |
| 76. H | 0.317319  | 1.003668  | 4.216663 |
| 77. C | 1.547443  | 2.771979  | 4.091873 |
| 78. H | 1.672158  | 2.826699  | 5.176124 |
| 79. C | 2.149376  | 3.738453  | 3.267728 |
| 80. H | 2.757549  | 4.537582  | 3.694358 |
| 81. C | 1.933572  | 3.659027  | 1.879514 |
| 82. H | 2.369608  | 4.408998  | 1.215393 |
| 83. C | 1.174094  | 2.625917  | 1.323919 |
| 84. H | 1.031651  | 2.583428  | 0.246100 |
| 85. C | -0.474114 | -0.565062 | 2.402742 |
| 86. C | -1.820737 | -0.976318 | 2.454949 |
| 87. H | -2.571931 | -0.363443 | 1.965587 |
| 88. C | -2.171674 | -2.186762 | 3.072658 |
| 89. H | -3.207477 | -2.527353 | 3.031510 |
| 90. C | -1.191230 | -2.960399 | 3.713432 |
| 91. H | -1.456955 | -3.908679 | 4.183961 |
| 92. C | 0.140345  | -2.507099 | 3.742169 |
| 93. H | 0.912693  | -3.095987 | 4.235201 |
| 94. C | 0.502690  | -1.330251 | 3.079650 |
| 95. H | 1.549234  | -1.025769 | 3.032996 |

**Cartesian coordinates [ $\text{\AA}$ ] for the optimized computed geometry of 3b.**

| <b>Atom</b> | <b>x</b>  | <b>y</b>  | <b>z</b>  |
|-------------|-----------|-----------|-----------|
| 1. As       | 0.091818  | 0.326401  | -0.393782 |
| 2. O        | -1.894283 | 0.077825  | -0.623181 |
| 3. O        | 2.060424  | -0.011049 | -0.083281 |
| 4. N        | 0.050893  | -1.602052 | -0.318835 |
| 5. N        | -0.163561 | 0.732197  | 1.621761  |
| 6. C        | -2.278232 | -1.211879 | -0.551945 |
| 7. C        | -3.632225 | -1.630000 | -0.568167 |
| 8. C        | -3.903275 | -3.012844 | -0.431081 |
| 9. H        | -4.939494 | -3.336345 | -0.393895 |
| 10. C       | -2.882731 | -3.976165 | -0.359847 |
| 11. C       | -1.541166 | -3.543447 | -0.413259 |
| 12. H       | -0.748865 | -4.280491 | -0.464232 |
| 13. C       | -1.222921 | -2.178648 | -0.420633 |
| 14. C       | -4.758885 | -0.590028 | -0.750711 |
| 15. C       | -4.568073 | 0.110861  | -2.128001 |
| 16. H       | -5.369381 | 0.852720  | -2.295908 |
| 17. H       | -4.602908 | -0.640962 | -2.934287 |
| 18. H       | -3.595207 | 0.620901  | -2.168045 |
| 19. C       | -4.718510 | 0.465800  | 0.391820  |
| 20. H       | -5.519857 | 1.212370  | 0.243718  |
| 21. H       | -3.752131 | 0.987979  | 0.409476  |
| 22. H       | -4.878894 | -0.025492 | 1.366234  |
| 23. C       | -6.165627 | -1.242390 | -0.738506 |
| 24. H       | -6.926538 | -0.456440 | -0.885849 |
| 25. H       | -6.373468 | -1.736366 | 0.225683  |
| 26. H       | -6.279655 | -1.979635 | -1.550915 |

|       |           |           |           |
|-------|-----------|-----------|-----------|
| 27. C | -3.156382 | -5.484485 | -0.171674 |
| 28. C | -2.576767 | -6.284454 | -1.373067 |
| 29. H | -3.047698 | -5.946247 | -2.311098 |
| 30. H | -2.765357 | -7.365533 | -1.245367 |
| 31. H | -1.489634 | -6.135504 | -1.468297 |
| 32. C | -4.669621 | -5.799931 | -0.066709 |
| 33. H | -5.204381 | -5.509416 | -0.985993 |
| 34. H | -5.126307 | -5.277711 | 0.790564  |
| 35. H | -4.810545 | -6.884825 | 0.081482  |
| 36. C | -2.474980 | -5.957808 | 1.147520  |
| 37. H | -2.836497 | -5.353824 | 1.995140  |
| 38. H | -1.381802 | -5.839448 | 1.099640  |
| 39. H | -2.696645 | -7.022954 | 1.340995  |
| 40. C | 2.288160  | -1.255754 | 0.380514  |
| 41. C | 3.482967  | -1.646029 | 1.039916  |
| 42. C | 3.577321  | -2.975442 | 1.516634  |
| 43. H | 4.501819  | -3.288636 | 1.992908  |
| 44. C | 2.522524  | -3.897492 | 1.397396  |
| 45. C | 1.326962  | -3.476073 | 0.782064  |
| 46. H | 0.473926  | -4.140105 | 0.797139  |
| 47. C | 1.197328  | -2.185141 | 0.252443  |
| 48. C | 4.617163  | -0.619793 | 1.251026  |
| 49. C | 5.080576  | -0.064983 | -0.128482 |
| 50. H | 4.251732  | 0.446892  | -0.636907 |
| 51. H | 5.425426  | -0.895782 | -0.767923 |
| 52. H | 5.912033  | 0.649389  | 0.010413  |
| 53. C | 5.854198  | -1.249580 | 1.944783  |
| 54. H | 6.285252  | -2.066819 | 1.340934  |
| 55. H | 5.605545  | -1.636070 | 2.947736  |
| 56. H | 6.628166  | -0.472494 | 2.067928  |
| 57. C | 4.105837  | 0.544268  | 2.149587  |
| 58. H | 3.238478  | 1.043586  | 1.700015  |
| 59. H | 4.901180  | 1.298069  | 2.290436  |
| 60. H | 3.813225  | 0.163599  | 3.142285  |
| 61. C | 2.622765  | -5.366255 | 1.874730  |
| 62. C | 2.339528  | -6.308270 | 0.665814  |
| 63. H | 1.309779  | -6.186353 | 0.295307  |
| 64. H | 2.476642  | -7.365390 | 0.956802  |
| 65. H | 3.025593  | -6.069839 | -0.163474 |
| 66. C | 4.029213  | -5.711231 | 2.427799  |
| 67. H | 4.049187  | -6.767052 | 2.750318  |
| 68. H | 4.282080  | -5.086771 | 3.300672  |
| 69. H | 4.804955  | -5.573188 | 1.656398  |
| 70. C | 1.582051  | -5.650839 | 2.995067  |
| 71. H | 0.565493  | -5.365807 | 2.683469  |
| 72. H | 1.831938  | -5.076773 | 3.901210  |
| 73. H | 1.578581  | -6.725866 | 3.251686  |
| 74. C | 0.637637  | 1.733164  | 2.169787  |
| 75. C | 0.881508  | 1.838112  | 3.572787  |
| 76. H | 0.415085  | 1.123288  | 4.250069  |

|       |           |           |          |
|-------|-----------|-----------|----------|
| 77. C | 1.704864  | 2.844402  | 4.089986 |
| 78. H | 1.875908  | 2.882706  | 5.168903 |
| 79. C | 2.307722  | 3.797935  | 3.250234 |
| 80. H | 2.961091  | 4.570450  | 3.658644 |
| 81. C | 2.030420  | 3.742402  | 1.871947 |
| 82. H | 2.466860  | 4.482092  | 1.196838 |
| 83. C | 1.209288  | 2.743907  | 1.341307 |
| 84. H | 1.019258  | 2.728443  | 0.268714 |
| 85. C | -0.438918 | -0.437245 | 2.394046 |
| 86. C | -1.751957 | -0.951854 | 2.403993 |
| 87. H | -2.538932 | -0.375933 | 1.924884 |
| 88. C | -2.022378 | -2.210572 | 2.962732 |
| 89. H | -3.030574 | -2.622308 | 2.884545 |
| 90. C | -0.998646 | -2.939365 | 3.588434 |
| 91. H | -1.202465 | -3.922669 | 4.015913 |
| 92. C | 0.297785  | -2.393472 | 3.655244 |
| 93. H | 1.108421  | -2.950339 | 4.124740 |
| 94. C | 0.581659  | -1.166848 | 3.051110 |
| 95. H | 1.606278  | -0.797466 | 3.025916 |

**Cartesian coordinates [Å] for the optimized computed geometry of 4a.**

| Atom  | <i>x</i>  | <i>y</i>  | <i>z</i>  |
|-------|-----------|-----------|-----------|
| 1. P  | 0.011815  | 0.017117  | 0.007277  |
| 2. H  | 1.325849  | 0.028934  | -0.513247 |
| 3. N  | -1.740406 | 0.017306  | -0.023976 |
| 4. O  | -0.032800 | 1.674455  | -0.404228 |
| 5. O  | -0.032437 | -1.619957 | -0.486319 |
| 6. O  | 0.182750  | -0.024679 | 1.616237  |
| 7. C  | 1.497002  | -0.044904 | 2.330344  |
| 8. C  | 2.285952  | -1.309933 | 1.946695  |
| 9. H  | 2.610928  | -1.294142 | 0.896711  |
| 10. H | 1.663528  | -2.200880 | 2.108968  |
| 11. H | 3.184778  | -1.388213 | 2.579742  |
| 12. C | 1.076266  | -0.097525 | 3.809653  |
| 13. H | 0.476068  | -0.999599 | 4.000272  |
| 14. H | 0.468284  | 0.783701  | 4.061916  |
| 15. H | 1.965669  | -0.115628 | 4.457827  |
| 16. C | 2.272928  | 1.251375  | 2.032380  |
| 17. H | 2.591915  | 1.311034  | 0.982112  |
| 18. H | 3.174328  | 1.294961  | 2.665100  |
| 19. H | 1.642855  | 2.122862  | 2.258471  |
| 20. C | -1.291992 | 2.247614  | -0.308035 |
| 21. C | -1.574441 | 3.616594  | -0.452317 |
| 22. C | -2.936809 | 3.979175  | -0.354917 |
| 23. H | -3.197330 | 5.030294  | -0.447219 |
| 24. C | -3.977023 | 3.046536  | -0.142666 |
| 25. C | -3.654272 | 1.682021  | -0.013910 |
| 26. H | -4.429262 | 0.946172  | 0.153889  |
| 27. C | -2.310540 | 1.287111  | -0.097687 |
| 28. C | -0.450205 | 4.636521  | -0.716254 |

|       |           |           |           |
|-------|-----------|-----------|-----------|
| 29. C | -0.992493 | 6.084614  | -0.805082 |
| 30. H | -1.476729 | 6.394259  | 0.135727  |
| 31. H | -1.709372 | 6.201701  | -1.634443 |
| 32. H | -0.152382 | 6.773555  | -0.992378 |
| 33. C | 0.584252  | 4.576425  | 0.445944  |
| 34. H | 0.082502  | 4.760533  | 1.410103  |
| 35. H | 1.360806  | 5.346178  | 0.299275  |
| 36. H | 1.073680  | 3.594948  | 0.487042  |
| 37. C | 0.239841  | 4.291357  | -2.068169 |
| 38. H | 1.034087  | 5.025898  | -2.283901 |
| 39. H | -0.498472 | 4.320935  | -2.886477 |
| 40. H | 0.689873  | 3.288760  | -2.044056 |
| 41. C | -5.436340 | 3.547313  | -0.050968 |
| 42. C | -6.445714 | 2.383583  | 0.121518  |
| 43. H | -6.405530 | 1.685708  | -0.731358 |
| 44. H | -7.468721 | 2.791394  | 0.171975  |
| 45. H | -6.266524 | 1.825320  | 1.055271  |
| 46. C | -5.573258 | 4.494604  | 1.175460  |
| 47. H | -4.924883 | 5.379336  | 1.077409  |
| 48. H | -5.285027 | 3.963722  | 2.097291  |
| 49. H | -6.615137 | 4.842516  | 1.277051  |
| 50. C | -5.800647 | 4.311271  | -1.356444 |
| 51. H | -5.649117 | 3.659804  | -2.232415 |
| 52. H | -5.179291 | 5.210273  | -1.488948 |
| 53. H | -6.856245 | 4.629998  | -1.329430 |
| 54. C | -1.284918 | -2.204470 | -0.375725 |
| 55. C | -1.563685 | -3.567749 | -0.547122 |
| 56. C | -2.921973 | -3.948906 | -0.399960 |
| 57. H | -3.171495 | -4.998258 | -0.516320 |
| 58. C | -3.952716 | -3.035139 | -0.106191 |
| 59. C | -3.632838 | -1.667198 | 0.041790  |
| 60. H | -4.408804 | -0.949866 | 0.283516  |
| 61. C | -2.304498 | -1.254922 | -0.104593 |
| 62. C | -0.445917 | -4.571361 | -0.891472 |
| 63. C | -0.981011 | -6.020697 | -1.001884 |
| 64. H | -0.144104 | -6.695392 | -1.246635 |
| 65. H | -1.732289 | -6.119815 | -1.802090 |
| 66. H | -1.420941 | -6.363849 | -0.051022 |
| 67. C | 0.639983  | -4.539560 | 0.223947  |
| 68. H | 1.406594  | -5.307751 | 0.026107  |
| 69. H | 0.181231  | -4.743830 | 1.205130  |
| 70. H | 1.133297  | -3.560254 | 0.264175  |
| 71. C | 0.182356  | -4.178374 | -2.260628 |
| 72. H | 0.976950  | -4.895159 | -2.529760 |
| 73. H | 0.619923  | -3.170422 | -2.226044 |
| 74. H | -0.588873 | -4.195208 | -3.048345 |
| 75. C | -5.426767 | -3.466740 | 0.065064  |
| 76. C | -5.626425 | -4.985168 | -0.166782 |
| 77. H | -5.329808 | -5.280413 | -1.186748 |
| 78. H | -6.692850 | -5.236367 | -0.042514 |

|       |           |           |           |
|-------|-----------|-----------|-----------|
| 79. H | -5.056115 | -5.584795 | 0.561441  |
| 80. C | -6.306692 | -2.699829 | -0.965675 |
| 81. H | -5.939584 | -2.884504 | -1.988412 |
| 82. H | -6.288439 | -1.612946 | -0.789946 |
| 83. H | -7.355195 | -3.035574 | -0.897842 |
| 84. C | -5.892724 | -3.131583 | 1.512656  |
| 85. H | -5.851837 | -2.049643 | 1.713523  |
| 86. H | -5.244841 | -3.637399 | 2.246965  |
| 87. H | -6.932471 | -3.466617 | 1.666129  |

**Cartesian coordinates [ $\text{\AA}$ ] for the optimized computed geometry of 5a.**

| Atom  | <i>x</i>  | <i>y</i>  | <i>z</i>  |
|-------|-----------|-----------|-----------|
| 1. P  | -0.160005 | 0.157747  | -0.129634 |
| 2. N  | 0.370190  | -1.381763 | 0.450654  |
| 3. O  | -1.594096 | -0.056160 | 0.901159  |
| 4. O  | 1.346335  | 0.201419  | -1.079821 |
| 5. O  | -1.039354 | 0.488539  | -1.434211 |
| 6. C  | -1.641420 | -1.253377 | 1.563081  |
| 7. C  | -2.666803 | -1.682165 | 2.422099  |
| 8. C  | -2.517437 | -2.978968 | 2.977023  |
| 9. H  | -3.286660 | -3.333056 | 3.655746  |
| 10. C | -1.432528 | -3.826821 | 2.682904  |
| 11. C | -0.419513 | -3.357075 | 1.816175  |
| 12. H | 0.407948  | -4.000194 | 1.530816  |
| 13. C | -0.514158 | -2.063865 | 1.302621  |
| 14. C | -3.851330 | -0.758466 | 2.762720  |
| 15. C | -4.618459 | -0.393317 | 1.459513  |
| 16. H | -4.963423 | -1.309878 | 0.953899  |
| 17. H | -3.974023 | 0.169450  | 0.770719  |
| 18. H | -5.497510 | 0.228160  | 1.702015  |
| 19. C | -3.303828 | 0.534197  | 3.435624  |
| 20. H | -2.641549 | 1.085455  | 2.752949  |
| 21. H | -2.741678 | 0.277055  | 4.348522  |
| 22. H | -4.139377 | 1.198297  | 3.715939  |
| 23. C | -4.848327 | -1.426166 | 3.742258  |
| 24. H | -5.294923 | -2.336477 | 3.309202  |
| 25. H | -5.667803 | -0.720844 | 3.957147  |
| 26. H | -4.368655 | -1.682167 | 4.701343  |
| 27. C | -1.296335 | -5.247670 | 3.274153  |
| 28. C | -2.450806 | -5.596351 | 4.245708  |
| 29. H | -2.479178 | -4.906581 | 5.104999  |
| 30. H | -2.300726 | -6.615225 | 4.639241  |
| 31. H | -3.428180 | -5.576402 | 3.736814  |
| 32. C | -1.307850 | -6.286537 | 2.114921  |
| 33. H | -0.470707 | -6.126323 | 1.417337  |
| 34. H | -2.246293 | -6.205448 | 1.542758  |
| 35. H | -1.224671 | -7.310714 | 2.516584  |
| 36. C | 0.044622  | -5.348612 | 4.059022  |
| 37. H | 0.914195  | -5.186664 | 3.403375  |
| 38. H | 0.147643  | -6.347373 | 4.515976  |

|       |           |           |           |
|-------|-----------|-----------|-----------|
| 39. H | 0.074689  | -4.588847 | 4.856937  |
| 40. C | 2.280668  | -0.702916 | -0.640551 |
| 41. C | 3.647573  | -0.720136 | -0.985653 |
| 42. C | 4.456119  | -1.620583 | -0.255413 |
| 43. H | 5.518214  | -1.659587 | -0.486629 |
| 44. C | 3.964343  | -2.459737 | 0.768836  |
| 45. C | 2.582724  | -2.463408 | 1.036280  |
| 46. H | 2.170983  | -3.054241 | 1.845526  |
| 47. C | 1.752994  | -1.615338 | 0.296814  |
| 48. C | 4.202038  | 0.186805  | -2.102195 |
| 49. C | 4.071853  | 1.682669  | -1.700847 |
| 50. H | 4.451282  | 2.322794  | -2.516030 |
| 51. H | 4.667557  | 1.890139  | -0.797075 |
| 52. H | 3.021934  | 1.949377  | -1.513666 |
| 53. C | 3.390190  | -0.071827 | -3.405138 |
| 54. H | 3.821426  | 0.504275  | -4.241246 |
| 55. H | 2.343275  | 0.234251  | -3.277426 |
| 56. H | 3.415608  | -1.143269 | -3.661562 |
| 57. C | 5.694419  | -0.107115 | -2.397519 |
| 58. H | 6.034254  | 0.541064  | -3.221921 |
| 59. H | 5.844664  | -1.153905 | -2.708410 |
| 60. H | 6.333984  | 0.104274  | -1.524827 |
| 61. C | 4.942965  | -3.361851 | 1.553408  |
| 62. C | 5.580524  | -4.389253 | 0.573410  |
| 63. H | 4.791367  | -4.983431 | 0.084210  |
| 64. H | 6.255564  | -5.073158 | 1.115875  |
| 65. H | 6.163980  | -3.886451 | -0.213998 |
| 66. C | 6.055370  | -2.489285 | 2.201951  |
| 67. H | 5.609519  | -1.767607 | 2.904242  |
| 68. H | 6.625191  | -1.926144 | 1.446926  |
| 69. H | 6.765626  | -3.126413 | 2.756449  |
| 70. C | 4.232088  | -4.146883 | 2.685402  |
| 71. H | 3.472297  | -4.837047 | 2.283747  |
| 72. H | 3.751932  | -3.467481 | 3.408780  |
| 73. H | 4.973789  | -4.752257 | 3.232038  |
| 74. C | -1.538076 | -0.580425 | -2.380772 |
| 75. C | -0.374625 | -1.440605 | -2.906075 |
| 76. H | 0.077454  | -2.056299 | -2.115262 |
| 77. H | 0.406112  | -0.809922 | -3.347175 |
| 78. H | -0.763780 | -2.118834 | -3.683536 |
| 79. C | -2.157954 | 0.257963  | -3.510210 |
| 80. H | -1.391663 | 0.902049  | -3.965873 |
| 81. H | -2.964200 | 0.892927  | -3.113994 |
| 82. H | -2.574423 | -0.402888 | -4.285538 |
| 83. C | -2.601959 | -1.439033 | -1.673874 |
| 84. H | -2.171758 | -2.074977 | -0.885598 |
| 85. H | -3.077793 | -2.100575 | -2.416519 |
| 86. H | -3.372444 | -0.799771 | -1.225310 |
| 87. C | 0.313317  | 1.674221  | 0.818096  |
| 88. H | 0.824618  | 2.382947  | 0.152527  |

|        |           |           |          |
|--------|-----------|-----------|----------|
| 89. H  | -0.582277 | 2.140354  | 1.251173 |
| 90. C  | 1.263189  | 1.149859  | 1.898750 |
| 91. C  | 2.656327  | 1.198512  | 1.693872 |
| 92. H  | 3.050648  | 1.737704  | 0.835008 |
| 93. C  | 3.533606  | 0.528336  | 2.558887 |
| 94. H  | 4.606217  | 0.556626  | 2.364654 |
| 95. C  | 3.026132  | -0.200111 | 3.645098 |
| 96. H  | 3.703310  | -0.735993 | 4.311224 |
| 97. C  | 1.641135  | -0.227484 | 3.879959 |
| 98. H  | 1.239169  | -0.786050 | 4.726753 |
| 99. C  | 0.764024  | 0.450086  | 3.018402 |
| 100. H | -0.309819 | 0.401673  | 3.198019 |

**Cartesian coordinates [Å] for the optimized computed geometry of 6a.**

| Atom  | <i>x</i>  | <i>y</i>  | <i>z</i>  |
|-------|-----------|-----------|-----------|
| 1. P  | 0.080870  | 0.005333  | 0.146345  |
| 2. N  | -1.882498 | -0.040702 | -0.340681 |
| 3. H  | -2.495474 | -0.060494 | 0.496239  |
| 4. O  | 0.248597  | 1.328493  | -0.807837 |
| 5. O  | 0.299935  | -1.350601 | -0.750866 |
| 6. C  | -0.900372 | 1.842880  | -1.460381 |
| 7. C  | -0.886249 | 2.975900  | -2.291300 |
| 8. C  | -2.150509 | 3.364633  | -2.800219 |
| 9. H  | -2.179609 | 4.226438  | -3.458562 |
| 10. C | -3.364977 | 2.711944  | -2.500235 |
| 11. C | -3.326472 | 1.598966  | -1.632230 |
| 12. H | -4.237987 | 1.071375  | -1.359580 |
| 13. C | -2.091883 | 1.181830  | -1.141900 |
| 14. C | 0.412336  | 3.742083  | -2.609575 |
| 15. C | 0.991003  | 4.320638  | -1.283424 |
| 16. H | 1.890121  | 4.918015  | -1.503365 |
| 17. H | 1.275483  | 3.529021  | -0.575826 |
| 18. H | 0.250152  | 4.975779  | -0.797248 |
| 19. C | 1.428176  | 2.772068  | -3.281724 |
| 20. H | 2.333669  | 3.328261  | -3.572278 |
| 21. H | 0.988874  | 2.326620  | -4.189281 |
| 22. H | 1.733758  | 1.960734  | -2.606543 |
| 23. C | 0.155082  | 4.922795  | -3.578532 |
| 24. H | 1.110612  | 5.432750  | -3.778963 |
| 25. H | -0.528294 | 5.670710  | -3.144605 |
| 26. H | -0.243393 | 4.580771  | -4.547798 |
| 27. C | -4.717150 | 3.138440  | -3.109637 |
| 28. C | -5.280944 | 1.944765  | -3.936877 |
| 29. H | -6.217441 | 2.240820  | -4.434789 |
| 30. H | -5.503377 | 1.073245  | -3.301084 |
| 31. H | -4.557156 | 1.634873  | -4.707811 |
| 32. C | -5.702296 | 3.511659  | -1.965288 |
| 33. H | -5.288001 | 4.325195  | -1.348870 |
| 34. H | -5.918054 | 2.655198  | -1.306280 |
| 35. H | -6.659215 | 3.850435  | -2.392357 |

|       |           |           |           |
|-------|-----------|-----------|-----------|
| 36. C | -4.573205 | 4.358994  | -4.051236 |
| 37. H | -4.207367 | 5.248832  | -3.514877 |
| 38. H | -5.560455 | 4.611428  | -4.467602 |
| 39. H | -3.905111 | 4.145394  | -4.901340 |
| 40. C | -0.817016 | -1.895425 | -1.432573 |
| 41. C | -0.749023 | -3.035153 | -2.259114 |
| 42. C | -1.984246 | -3.459035 | -2.794379 |
| 43. H | -1.978514 | -4.329450 | -3.444251 |
| 44. C | -3.227818 | -2.831531 | -2.538971 |
| 45. C | -3.243891 | -1.713607 | -1.685491 |
| 46. H | -4.171965 | -1.202440 | -1.446181 |
| 47. C | -2.031107 | -1.265596 | -1.154674 |
| 48. C | 0.578922  | -3.763704 | -2.539934 |
| 49. C | 1.581594  | -2.766703 | -3.190925 |
| 50. H | 2.508752  | -3.297206 | -3.458245 |
| 51. H | 1.847842  | -1.945081 | -2.511622 |
| 52. H | 1.151334  | -2.336900 | -4.109830 |
| 53. C | 1.140794  | -4.319833 | -1.197762 |
| 54. H | 2.062151  | -4.890851 | -1.392711 |
| 55. H | 0.408038  | -4.994905 | -0.727519 |
| 56. H | 1.384507  | -3.517877 | -0.486712 |
| 57. C | 0.379864  | -4.954750 | -3.510167 |
| 58. H | 1.354418  | -5.434705 | -3.687520 |
| 59. H | -0.006810 | -4.628264 | -4.489145 |
| 60. H | -0.288651 | -5.722517 | -3.089210 |
| 61. C | -4.509618 | -3.380500 | -3.199255 |
| 62. C | -4.770931 | -4.819101 | -2.665088 |
| 63. H | -3.946541 | -5.504293 | -2.916283 |
| 64. H | -5.693779 | -5.223761 | -3.110994 |
| 65. H | -4.886810 | -4.810015 | -1.569198 |
| 66. C | -5.746474 | -2.501689 | -2.887569 |
| 67. H | -5.975441 | -2.477704 | -1.810125 |
| 68. H | -6.627910 | -2.922282 | -3.394989 |
| 69. H | -5.615956 | -1.473379 | -3.261391 |
| 70. C | -4.311903 | -3.406096 | -4.743889 |
| 71. H | -3.511380 | -4.096855 | -5.048592 |
| 72. H | -4.060527 | -2.400059 | -5.117565 |
| 73. H | -5.240604 | -3.738742 | -5.234316 |

**Cartesian coordinates [Å] for the optimized computed geometry of 6b.**

| <b>Atom</b> | <b>x</b>  | <b>y</b>  | <b>z</b>  |
|-------------|-----------|-----------|-----------|
| 1. As       | 0.166944  | 0.020729  | 0.281418  |
| 2. N        | -1.866256 | -0.039702 | -0.336193 |
| 3. H        | -2.525587 | -0.067653 | 0.464656  |
| 4. O        | 0.312490  | 1.427780  | -0.843394 |
| 5. O        | 0.368365  | -1.474910 | -0.708419 |
| 6. C        | -0.871210 | 1.873716  | -1.455990 |
| 7. C        | -0.902986 | 3.009152  | -2.294938 |
| 8. C        | -2.175797 | 3.370632  | -2.794762 |
| 9. H        | -2.227054 | 4.229053  | -3.455670 |



|       |           |           |           |
|-------|-----------|-----------|-----------|
| 10. C | -3.375523 | 2.697937  | -2.481272 |
| 11. C | -3.302484 | 1.592308  | -1.611191 |
| 12. H | -4.202035 | 1.050611  | -1.325793 |
| 13. C | -2.054069 | 1.189960  | -1.134244 |
| 14. C | 0.370907  | 3.812350  | -2.624632 |
| 15. C | 0.944347  | 4.409014  | -1.304562 |
| 16. H | 1.818719  | 5.038548  | -1.533458 |
| 17. H | 1.264520  | 3.625977  | -0.603019 |
| 18. H | 0.185899  | 5.036890  | -0.809532 |
| 19. C | 1.409086  | 2.876240  | -3.309250 |
| 20. H | 2.298588  | 3.458202  | -3.597279 |
| 21. H | 0.977078  | 2.429707  | -4.219471 |
| 22. H | 1.736225  | 2.065131  | -2.644310 |
| 23. C | 0.071388  | 4.987332  | -3.589338 |
| 24. H | 1.010904  | 5.521313  | -3.800310 |
| 25. H | -0.625856 | 5.716969  | -3.147420 |
| 26. H | -0.328911 | 4.636391  | -4.554375 |
| 27. C | -4.739685 | 3.090052  | -3.087777 |
| 28. C | -5.270657 | 1.882747  | -3.916676 |
| 29. H | -6.206970 | 2.157516  | -4.427067 |
| 30. H | -5.483696 | 1.011986  | -3.276956 |
| 31. H | -4.531641 | 1.582144  | -4.676672 |
| 32. C | -5.737019 | 3.435252  | -1.945710 |
| 33. H | -5.352453 | 4.267914  | -1.335542 |
| 34. H | -5.922196 | 2.576517  | -1.280325 |
| 35. H | -6.705905 | 3.735378  | -2.374667 |
| 36. C | -4.627570 | 4.315599  | -4.028087 |
| 37. H | -4.273848 | 5.210893  | -3.491921 |
| 38. H | -5.623131 | 4.550089  | -4.435713 |
| 39. H | -3.962334 | 4.116737  | -4.883966 |
| 40. C | -0.766078 | -1.933122 | -1.398088 |
| 41. C | -0.726441 | -3.076480 | -2.233937 |
| 42. C | -1.958394 | -3.467578 | -2.793676 |
| 43. H | -1.962673 | -4.336988 | -3.444734 |
| 44. C | -3.190276 | -2.809584 | -2.561569 |
| 45. C | -3.188139 | -1.692841 | -1.710135 |
| 46. H | -4.106527 | -1.154392 | -1.494043 |
| 47. C | -1.974458 | -1.268237 | -1.155214 |
| 48. C | 0.584089  | -3.843882 | -2.497599 |
| 49. C | 1.625344  | -2.876889 | -3.132780 |
| 50. H | 2.541500  | -3.433324 | -3.385103 |
| 51. H | 1.901673  | -2.061526 | -2.450136 |
| 52. H | 1.221222  | -2.436642 | -4.058744 |
| 53. C | 1.111177  | -4.425737 | -1.152222 |
| 54. H | 2.012739  | -5.029635 | -1.339823 |
| 55. H | 0.348690  | -5.075687 | -0.693354 |
| 56. H | 1.375170  | -3.635529 | -0.435684 |
| 57. C | 0.364839  | -5.025906 | -3.475458 |
| 58. H | 1.327603  | -5.534231 | -3.639155 |
| 59. H | 0.003527  | -4.685075 | -4.459459 |

|       |           |           |           |
|-------|-----------|-----------|-----------|
| 60. H | -0.333114 | -5.774651 | -3.067145 |
| 61. C | -4.473098 | -3.322436 | -3.249024 |
| 62. C | -4.779629 | -4.757551 | -2.731440 |
| 63. H | -3.967407 | -5.460837 | -2.970954 |
| 64. H | -5.702456 | -5.136505 | -3.199021 |
| 65. H | -4.917841 | -4.753191 | -1.638622 |
| 66. C | -5.694230 | -2.417341 | -2.953821 |
| 67. H | -5.938803 | -2.389159 | -1.879258 |
| 68. H | -6.577855 | -2.818528 | -3.474433 |
| 69. H | -5.534744 | -1.392090 | -3.324839 |
| 70. C | -4.247218 | -3.342782 | -4.788961 |
| 71. H | -3.451020 | -4.043615 | -5.082165 |
| 72. H | -3.973837 | -2.339387 | -5.152677 |
| 73. H | -5.171439 | -3.659632 | -5.297512 |

**Cartesian coordinates [ $\text{\AA}$ ] for the optimized computed geometry of 7a.**

| <b>Atom</b> | <b>x</b>  | <b>y</b>  | <b>z</b>  |
|-------------|-----------|-----------|-----------|
| 1. P        | -0.068576 | 0.066597  | 0.031413  |
| 2. N        | 0.015590  | -1.910743 | -0.175187 |
| 3. C        | -0.056346 | -2.649937 | 1.135578  |
| 4. H        | 0.738380  | -2.266804 | 1.789024  |
| 5. H        | 0.118776  | -3.718315 | 0.957345  |
| 6. H        | -1.047247 | -2.492421 | 1.578795  |
| 7. O        | -0.674791 | 0.132183  | -1.514041 |
| 8. O        | 1.550362  | 0.160722  | -0.139403 |
| 9. C        | -1.423021 | -1.023817 | -1.854393 |
| 10. C       | -2.408348 | -1.059123 | -2.859763 |
| 11. C       | -2.998963 | -2.323896 | -3.070942 |
| 12. H       | -3.759197 | -2.401149 | -3.843268 |
| 13. C       | -2.679450 | -3.493576 | -2.341997 |
| 14. C       | -1.701370 | -3.402770 | -1.331057 |
| 15. H       | -1.431702 | -4.267137 | -0.729262 |
| 16. C       | -1.095639 | -2.165303 | -1.112200 |
| 17. C       | -2.795874 | 0.192277  | -3.667418 |
| 18. C       | -3.314284 | 1.288431  | -2.691738 |
| 19. H       | -2.529541 | 1.628183  | -2.001837 |
| 20. H       | -4.163704 | 0.907366  | -2.102948 |
| 21. H       | -3.657827 | 2.162059  | -3.267072 |
| 22. C       | -3.918460 | -0.115273 | -4.688704 |
| 23. H       | -4.841614 | -0.454302 | -4.193040 |
| 24. H       | -3.605540 | -0.865082 | -5.432207 |
| 25. H       | -4.162864 | 0.805718  | -5.238821 |
| 26. C       | -1.547085 | 0.694543  | -4.448364 |
| 27. H       | -0.735800 | 1.005435  | -3.775002 |
| 28. H       | -1.824687 | 1.560482  | -5.069021 |
| 29. H       | -1.167255 | -0.100116 | -5.109677 |
| 30. C       | -3.409840 | -4.811332 | -2.668200 |
| 31. C       | -2.898031 | -5.991149 | -1.806539 |
| 32. H       | -1.825931 | -6.186104 | -1.975192 |
| 33. H       | -3.441898 | -6.906160 | -2.086514 |

|       |           |           |           |
|-------|-----------|-----------|-----------|
| 34. H | -3.077953 | -5.824129 | -0.731959 |
| 35. C | -4.930521 | -4.624895 | -2.393800 |
| 36. H | -5.370204 | -3.842214 | -3.030832 |
| 37. H | -5.101593 | -4.347125 | -1.341394 |
| 38. H | -5.466716 | -5.564876 | -2.598896 |
| 39. C | -3.173486 | -5.160104 | -4.167159 |
| 40. H | -3.602091 | -4.401873 | -4.840002 |
| 41. H | -3.649598 | -6.123842 | -4.406275 |
| 42. H | -2.095761 | -5.239292 | -4.381352 |
| 43. C | 2.125258  | -0.936530 | -0.842885 |
| 44. C | 3.391097  | -0.910555 | -1.446800 |
| 45. C | 3.772551  | -2.111717 | -2.093740 |
| 46. H | 4.738193  | -2.128986 | -2.587881 |
| 47. C | 2.969271  | -3.270972 | -2.150824 |
| 48. C | 1.717905  | -3.251640 | -1.497661 |
| 49. H | 1.050464  | -4.110754 | -1.532043 |
| 50. C | 1.324685  | -2.085359 | -0.853945 |
| 51. C | 4.289139  | 0.339187  | -1.396632 |
| 52. C | 4.613801  | 0.659780  | 0.093299  |
| 53. H | 5.295331  | 1.523445  | 0.144492  |
| 54. H | 5.109776  | -0.201157 | 0.569786  |
| 55. H | 3.711505  | 0.908574  | 0.669669  |
| 56. C | 5.625517  | 0.112777  | -2.146419 |
| 57. H | 5.466530  | -0.097953 | -3.216215 |
| 58. H | 6.217776  | -0.700756 | -1.698033 |
| 59. H | 6.229655  | 1.030460  | -2.080341 |
| 60. C | 3.549187  | 1.533118  | -2.068465 |
| 61. H | 3.276763  | 1.280792  | -3.105735 |
| 62. H | 4.211316  | 2.412654  | -2.088534 |
| 63. H | 2.637101  | 1.813074  | -1.523931 |
| 64. C | 3.389569  | -4.543678 | -2.910140 |
| 65. C | 4.745349  | -4.370750 | -3.636103 |
| 66. H | 4.990524  | -5.301033 | -4.171625 |
| 67. H | 5.568377  | -4.175575 | -2.929728 |
| 68. H | 4.706124  | -3.561422 | -4.383048 |
| 69. C | 3.516376  | -5.713902 | -1.891805 |
| 70. H | 2.556938  | -5.933386 | -1.396608 |
| 71. H | 4.258192  | -5.470531 | -1.114518 |
| 72. H | 3.841803  | -6.628698 | -2.410618 |
| 73. C | 2.302428  | -4.878165 | -3.973845 |
| 74. H | 1.327102  | -5.103737 | -3.515539 |
| 75. H | 2.608710  | -5.762276 | -4.552773 |
| 76. H | 2.168634  | -4.034517 | -4.668119 |

**Cartesian coordinates [ $\text{\AA}$ ] for the optimized computed geometry of 7b.**

| Atom  | <i>x</i>  | <i>y</i>  | <i>z</i>  |
|-------|-----------|-----------|-----------|
| 1. As | -0.114184 | 0.171201  | 0.265606  |
| 2. N  | -0.008239 | -1.907524 | -0.042620 |
| 3. C  | -0.068760 | -2.713413 | 1.226688  |
| 4. H  | 0.727599  | -2.360586 | 1.895988  |

|       |           |           |           |
|-------|-----------|-----------|-----------|
| 5. H  | 0.117446  | -3.770421 | 0.995772  |
| 6. H  | -1.059525 | -2.593244 | 1.683084  |
| 7. O  | -0.712333 | 0.183752  | -1.460031 |
| 8. O  | 1.663314  | 0.190769  | 0.038333  |
| 9. C  | -1.412011 | -0.996780 | -1.773475 |
| 10. C | -2.346281 | -1.074521 | -2.832088 |
| 11. C | -2.907601 | -2.348142 | -3.058585 |
| 12. H | -3.621234 | -2.446569 | -3.871704 |
| 13. C | -2.614262 | -3.502662 | -2.296017 |
| 14. C | -1.694638 | -3.379629 | -1.238085 |
| 15. H | -1.446755 | -4.232817 | -0.611695 |
| 16. C | -1.108721 | -2.132271 | -1.003125 |
| 17. C | -2.702735 | 0.153019  | -3.691711 |
| 18. C | -3.281568 | 1.270529  | -2.776366 |
| 19. H | -2.534784 | 1.640606  | -2.061244 |
| 20. H | -4.153938 | 0.894918  | -2.217856 |
| 21. H | -3.608466 | 2.122006  | -3.393529 |
| 22. C | -3.767688 | -0.189837 | -4.763193 |
| 23. H | -4.712135 | -0.530318 | -4.308735 |
| 24. H | -3.407445 | -0.951019 | -5.473716 |
| 25. H | -3.993161 | 0.717007  | -5.345439 |
| 26. C | -1.418837 | 0.644827  | -4.423080 |
| 27. H | -0.642366 | 0.972962  | -3.717608 |
| 28. H | -1.669097 | 1.494728  | -5.077491 |
| 29. H | -1.004566 | -0.163778 | -5.046361 |
| 30. C | -3.301524 | -4.838102 | -2.645833 |
| 31. C | -2.824252 | -5.997217 | -1.737294 |
| 32. H | -1.740762 | -6.176902 | -1.838193 |
| 33. H | -3.336136 | -6.925307 | -2.035404 |
| 34. H | -3.070854 | -5.817999 | -0.677613 |
| 35. C | -4.840177 | -4.675834 | -2.471669 |
| 36. H | -5.252504 | -3.917109 | -3.154434 |
| 37. H | -5.081874 | -4.375530 | -1.439327 |
| 38. H | -5.345904 | -5.630673 | -2.685721 |
| 39. C | -2.965909 | -5.204039 | -4.122343 |
| 40. H | -3.358907 | -4.459958 | -4.831640 |
| 41. H | -3.415400 | -6.176766 | -4.377706 |
| 42. H | -1.876064 | -5.273474 | -4.266865 |
| 43. C | 2.124634  | -0.904757 | -0.721472 |
| 44. C | 3.360030  | -0.897328 | -1.400501 |
| 45. C | 3.695982  | -2.090195 | -2.083013 |
| 46. H | 4.636112  | -2.111438 | -2.623970 |
| 47. C | 2.874007  | -3.235825 | -2.123590 |
| 48. C | 1.651254  | -3.199545 | -1.424265 |
| 49. H | 0.959295  | -4.038447 | -1.466401 |
| 50. C | 1.299366  | -2.042102 | -0.738599 |
| 51. C | 4.268588  | 0.347145  | -1.409161 |
| 52. C | 4.704896  | 0.667744  | 0.051443  |
| 53. H | 5.383247  | 1.535120  | 0.052299  |
| 54. H | 5.240804  | -0.191571 | 0.484766  |

|       |          |           |           |
|-------|----------|-----------|-----------|
| 55. H | 3.847788 | 0.907457  | 0.696227  |
| 56. C | 5.547222 | 0.116884  | -2.254126 |
| 57. H | 5.311332 | -0.080713 | -3.312043 |
| 58. H | 6.162073 | -0.706162 | -1.856618 |
| 59. H | 6.162923 | 1.028352  | -2.220967 |
| 60. C | 3.488969 | 1.543396  | -2.031041 |
| 61. H | 3.132182 | 1.284115  | -3.040721 |
| 62. H | 4.155585 | 2.416312  | -2.112194 |
| 63. H | 2.625345 | 1.835428  | -1.418240 |
| 64. C | 3.219171 | -4.492150 | -2.946517 |
| 65. C | 4.607394 | -4.386018 | -3.622007 |
| 66. H | 4.808609 | -5.311787 | -4.182778 |
| 67. H | 5.413647 | -4.268391 | -2.880453 |
| 68. H | 4.651254 | -3.552790 | -4.341789 |
| 69. C | 3.220915 | -5.733584 | -2.007410 |
| 70. H | 2.228732 | -5.921910 | -1.566846 |
| 71. H | 3.943394 | -5.595065 | -1.187180 |
| 72. H | 3.506660 | -6.632823 | -2.575179 |
| 73. C | 2.138583 | -4.662087 | -4.057550 |
| 74. H | 1.133126 | -4.814701 | -3.633709 |
| 75. H | 2.377932 | -5.536802 | -4.682661 |
| 76. H | 2.105437 | -3.768697 | -4.702045 |

**Cartesian coordinates [Å] for the optimized computed geometry of 8a.**

| <b>Atom</b> | <b>x</b>  | <b>y</b>  | <b>z</b>  |
|-------------|-----------|-----------|-----------|
| 1. P        | 0.052630  | 0.142926  | 0.174566  |
| 2. O        | 1.306267  | 0.467865  | -0.941565 |
| 3. O        | -1.421222 | -0.435469 | 0.817850  |
| 4. N        | 0.691141  | -1.481586 | 0.330429  |
| 5. C        | 2.334748  | -0.473557 | -0.928520 |
| 6. C        | 3.580233  | -0.331818 | -1.573262 |
| 7. C        | 4.458772  | -1.435200 | -1.456433 |
| 8. H        | 5.429171  | -1.371538 | -1.935487 |
| 9. C        | 4.141768  | -2.618445 | -0.742454 |
| 10. C       | 2.886702  | -2.715089 | -0.105218 |
| 11. H       | 2.621355  | -3.601058 | 0.449756  |
| 12. C       | 1.986144  | -1.636734 | -0.199909 |
| 13. C       | 3.942300  | 0.961495  | -2.346032 |
| 14. C       | 2.927544  | 1.161934  | -3.524390 |
| 15. H       | 3.201643  | 2.058156  | -4.104267 |
| 16. H       | 1.901727  | 1.288648  | -3.154197 |
| 17. H       | 2.951749  | 0.287971  | -4.195212 |
| 18. C       | 5.378188  | 0.897586  | -2.952903 |
| 19. H       | 5.586447  | 1.841357  | -3.480099 |
| 20. H       | 5.475720  | 0.078558  | -3.682738 |
| 21. H       | 6.144212  | 0.775599  | -2.171525 |
| 22. C       | 5.182450  | -3.774882 | -0.689429 |
| 23. C       | 6.518682  | -3.245489 | -0.065283 |
| 24. H       | 7.245339  | -4.068713 | 0.028526  |
| 25. H       | 6.332115  | -2.822967 | 0.934534  |

|        |           |           |           |
|--------|-----------|-----------|-----------|
| 26. H  | 6.975504  | -2.461055 | -0.685679 |
| 27. C  | 5.444955  | -4.293339 | -2.145398 |
| 28. H  | 4.504955  | -4.648457 | -2.596280 |
| 29. H  | 6.166517  | -5.126291 | -2.128055 |
| 30. H  | 5.853471  | -3.500543 | -2.789125 |
| 31. C  | -1.317719 | -1.679099 | 1.440184  |
| 32. C  | -2.309302 | -2.276544 | 2.244879  |
| 33. C  | -1.994661 | -3.561847 | 2.749144  |
| 34. H  | -2.725116 | -4.057380 | 3.379144  |
| 35. C  | -0.776310 | -4.235451 | 2.477837  |
| 36. C  | 0.187970  | -3.599398 | 1.667242  |
| 37. H  | 1.124391  | -4.087039 | 1.446554  |
| 38. C  | -0.087240 | -2.318705 | 1.152310  |
| 39. C  | -3.648481 | -1.552847 | 2.539057  |
| 40. C  | -4.407217 | -1.309876 | 1.188342  |
| 41. H  | -3.828179 | -0.668936 | 0.510826  |
| 42. H  | -5.375501 | -0.822289 | 1.385928  |
| 43. H  | -4.595614 | -2.271508 | 0.684724  |
| 44. C  | -4.577231 | -2.395615 | 3.468279  |
| 45. H  | -5.509276 | -1.836493 | 3.645044  |
| 46. H  | -4.109612 | -2.583058 | 4.447926  |
| 47. H  | -4.848257 | -3.359139 | 3.008890  |
| 48. C  | -0.525923 | -5.642029 | 3.094267  |
| 49. C  | 0.824357  | -6.266799 | 2.621624  |
| 50. H  | 1.687059  | -5.661139 | 2.939527  |
| 51. H  | 0.851994  | -6.387430 | 1.527389  |
| 52. H  | 0.938516  | -7.265705 | 3.070768  |
| 53. C  | -1.679619 | -6.614039 | 2.670203  |
| 54. H  | -1.741354 | -6.674486 | 1.572427  |
| 55. H  | -2.655621 | -6.277767 | 3.049830  |
| 56. H  | -1.490692 | -7.623167 | 3.069749  |
| 57. H  | -0.715179 | 1.092899  | -0.528466 |
| 58. Cl | 0.778403  | 1.240529  | 1.865334  |
| 59. C  | 3.885068  | 2.179421  | -1.360145 |
| 60. H  | 4.174583  | 3.101594  | -1.889964 |
| 61. H  | 2.877665  | 2.316421  | -0.945862 |
| 62. H  | 4.584822  | 2.020043  | -0.523752 |
| 63. C  | 4.692067  | -4.979586 | 0.171171  |
| 64. H  | 3.768276  | -5.418838 | -0.236335 |
| 65. H  | 5.462823  | -5.766408 | 0.166781  |
| 66. H  | 4.519397  | -4.685464 | 1.217857  |
| 67. C  | -3.355010 | -0.189633 | 3.255699  |
| 68. H  | -2.756685 | 0.478711  | 2.623284  |
| 69. H  | -4.302926 | 0.314981  | 3.501209  |
| 70. H  | -2.800470 | -0.368553 | 4.190401  |
| 71. C  | -0.484628 | -5.516688 | 4.656037  |
| 72. H  | 0.313954  | -4.821802 | 4.959447  |
| 73. H  | -1.436965 | -5.136769 | 5.054956  |
| 74. H  | -0.289436 | -6.501071 | 5.111352  |

**Cartesian coordinates [ $\text{\AA}$ ] for the optimized computed geometry of 9a.**

| Atom  | $x$       | $y$       | $z$       |
|-------|-----------|-----------|-----------|
| 1. P  | -0.061245 | 0.036164  | -0.063862 |
| 2. N  | -0.375083 | -2.403458 | 0.572652  |
| 3. O  | 1.110420  | -0.823854 | -0.957067 |
| 4. O  | 0.608216  | -0.045939 | 1.513651  |
| 5. O  | 0.692758  | 1.471336  | -0.443477 |
| 6. C  | 0.714543  | -2.031082 | -1.522042 |
| 7. C  | 1.069320  | -2.374006 | -2.844326 |
| 8. C  | 0.681327  | -3.659628 | -3.295419 |
| 9. H  | 0.961439  | -3.951357 | -4.302401 |
| 10. C | -0.054230 | -4.569594 | -2.511851 |
| 11. C | -0.433018 | -4.170288 | -1.212336 |
| 12. H | -1.017100 | -4.833382 | -0.573979 |
| 13. C | -0.047468 | -2.919564 | -0.721415 |
| 14. C | 1.837008  | -1.385018 | -3.748596 |
| 15. C | 1.032589  | -0.055743 | -3.876967 |
| 16. H | 0.005134  | -0.266143 | -4.217377 |
| 17. H | 1.518669  | 0.599683  | -4.619644 |
| 18. H | 0.989871  | 0.482671  | -2.922289 |
| 19. C | 3.239629  | -1.109704 | -3.133389 |
| 20. H | 3.803852  | -2.052864 | -3.046826 |
| 21. H | 3.156614  | -0.659318 | -2.134975 |
| 22. H | 3.803986  | -0.419271 | -3.783039 |
| 23. C | 2.038125  | -1.952275 | -5.177791 |
| 24. H | 2.640398  | -2.875398 | -5.173053 |
| 25. H | 2.579179  | -1.207816 | -5.784462 |
| 26. H | 1.073712  | -2.151911 | -5.674169 |
| 27. C | -0.436811 | -5.981054 | -3.009607 |
| 28. C | -1.985311 | -6.130587 | -2.999822 |
| 29. H | -2.398845 | -6.017228 | -1.985342 |
| 30. H | -2.275595 | -7.126341 | -3.375506 |
| 31. H | -2.444674 | -5.362071 | -3.642346 |
| 32. C | 0.203532  | -7.038359 | -2.062559 |
| 33. H | -0.187007 | -6.952998 | -1.036373 |
| 34. H | 1.296223  | -6.900162 | -2.023754 |
| 35. H | -0.012433 | -8.057767 | -2.424795 |
| 36. C | 0.067223  | -6.255075 | -4.448333 |
| 37. H | -0.229693 | -7.273165 | -4.750698 |
| 38. H | 1.166044  | -6.195807 | -4.510145 |
| 39. H | -0.372709 | -5.550531 | -5.172578 |
| 40. C | 1.168921  | -1.209752 | 2.002756  |
| 41. C | 2.201729  | -1.159353 | 2.979794  |
| 42. C | 2.767333  | -2.388791 | 3.365715  |
| 43. H | 3.566819  | -2.375729 | 4.102768  |
| 44. C | 2.378304  | -3.641443 | 2.829967  |
| 45. C | 1.335080  | -3.651889 | 1.892836  |
| 46. H | 0.988815  | -4.573011 | 1.425298  |
| 47. C | 0.723678  | -2.450038 | 1.508415  |
| 48. C | 2.673823  | 0.189646  | 3.562944  |

|       |           |           |           |
|-------|-----------|-----------|-----------|
| 49. C | 3.779141  | -0.000993 | 4.633349  |
| 50. H | 4.067017  | 0.986572  | 5.029867  |
| 51. H | 4.684370  | -0.464532 | 4.207263  |
| 52. H | 3.424456  | -0.610525 | 5.481200  |
| 53. C | 1.469394  | 0.900943  | 4.249730  |
| 54. H | 1.801894  | 1.851061  | 4.701060  |
| 55. H | 1.059014  | 0.259072  | 5.047530  |
| 56. H | 0.667130  | 1.117093  | 3.532283  |
| 57. C | 3.257079  | 1.075624  | 2.422364  |
| 58. H | 3.622576  | 2.028428  | 2.842267  |
| 59. H | 2.507337  | 1.292703  | 1.651121  |
| 60. H | 4.103116  | 0.556732  | 1.941878  |
| 61. C | 3.110493  | -4.923083 | 3.278706  |
| 62. C | 2.947520  | -5.099560 | 4.816203  |
| 63. H | 3.449337  | -6.023581 | 5.149707  |
| 64. H | 1.878929  | -5.161437 | 5.079312  |
| 65. H | 3.385440  | -4.255411 | 5.371395  |
| 66. C | 4.618256  | -4.799798 | 2.914695  |
| 67. H | 5.155342  | -5.722695 | 3.191217  |
| 68. H | 5.094443  | -3.957983 | 3.441388  |
| 69. H | 4.733462  | -4.631873 | 1.831677  |
| 70. C | 2.546357  | -6.187131 | 2.582330  |
| 71. H | 3.100450  | -7.074868 | 2.929164  |
| 72. H | 2.658435  | -6.129230 | 1.487416  |
| 73. H | 1.482252  | -6.340810 | 2.826866  |
| 74. C | -1.669427 | -2.794298 | 1.155652  |
| 75. H | -2.457972 | -2.633201 | 0.405766  |
| 76. H | -1.854720 | -2.147444 | 2.026714  |
| 77. H | -1.687519 | -3.847710 | 1.496177  |
| 78. C | -0.077897 | 2.735853  | -0.336846 |
| 79. C | 0.935465  | 3.808978  | -0.773913 |
| 80. H | 1.266446  | 3.614959  | -1.805614 |
| 81. H | 1.816986  | 3.783493  | -0.115743 |
| 82. H | 0.479483  | 4.810297  | -0.726007 |
| 83. C | -1.286877 | 2.704259  | -1.296651 |
| 84. H | -0.948934 | 2.466600  | -2.317044 |
| 85. H | -1.782068 | 3.689438  | -1.309204 |
| 86. H | -2.025295 | 1.949943  | -0.986359 |
| 87. C | -0.513973 | 2.958428  | 1.126249  |
| 88. H | 0.361174  | 2.904783  | 1.790096  |
| 89. H | -1.240749 | 2.194651  | 1.446114  |
| 90. H | -0.984992 | 3.949355  | 1.235539  |



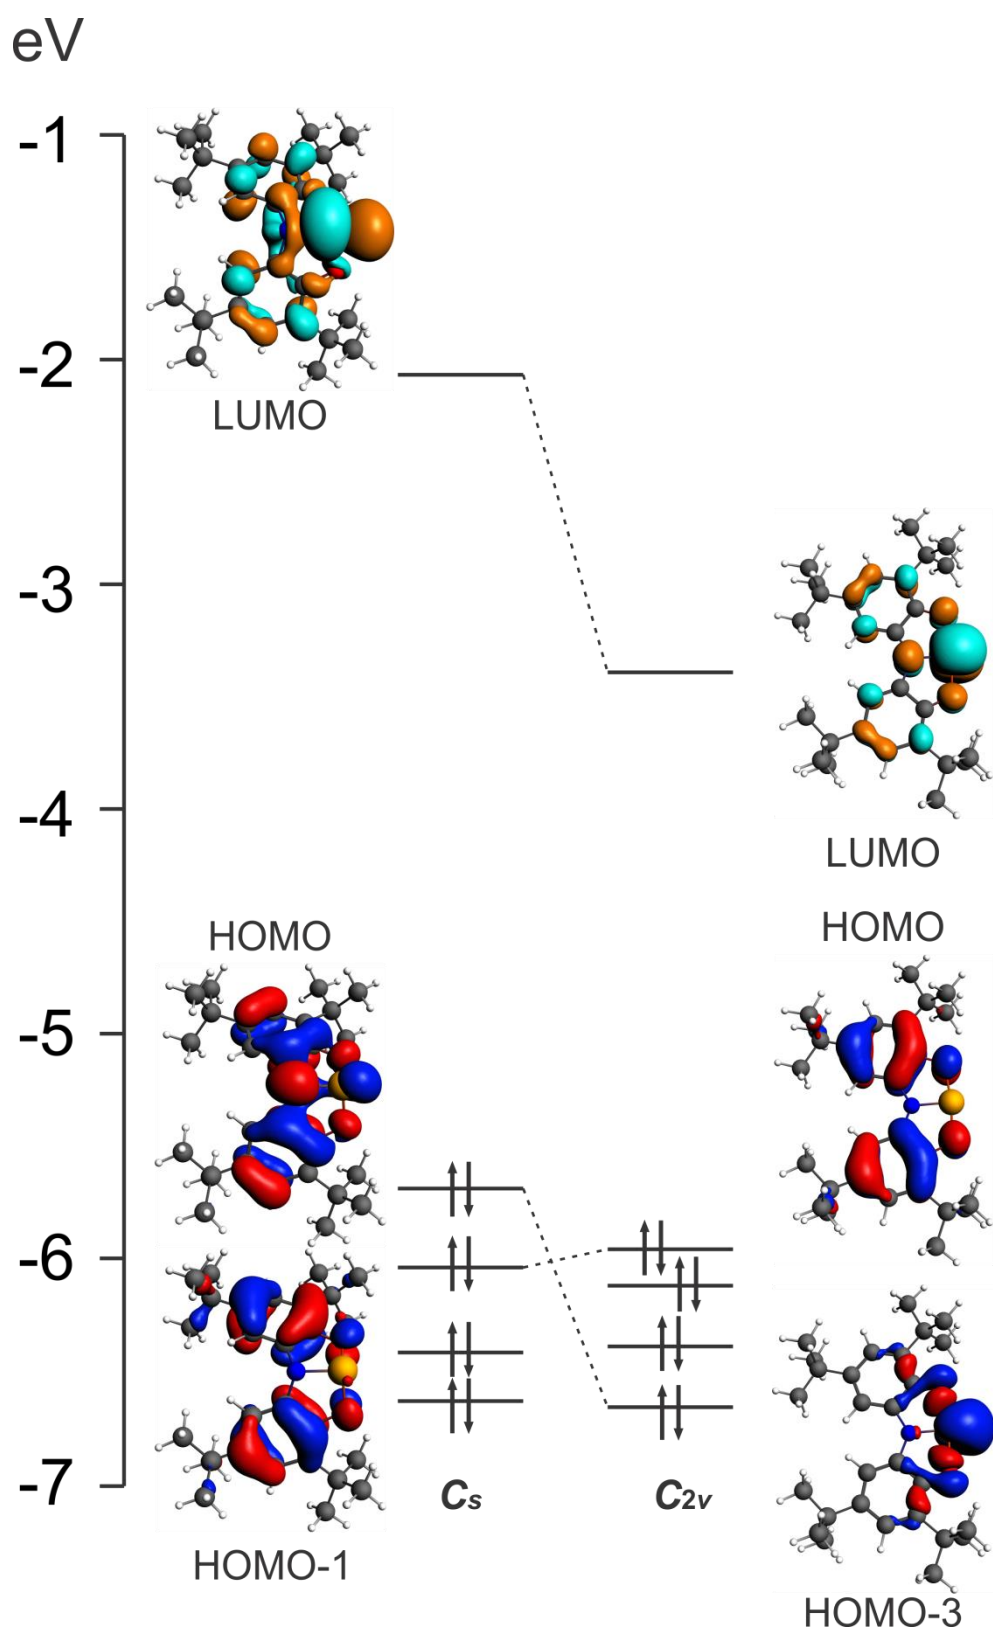

**Figure S1.** Relative frontier orbital energies and selected Kohn-Sham molecular orbital representations (contour values 0.03 au) for selected orbitals of **1a** in pyramidal (left) and planar (right) configurations.

## 2. NMR data

### NMR spectra for 1b

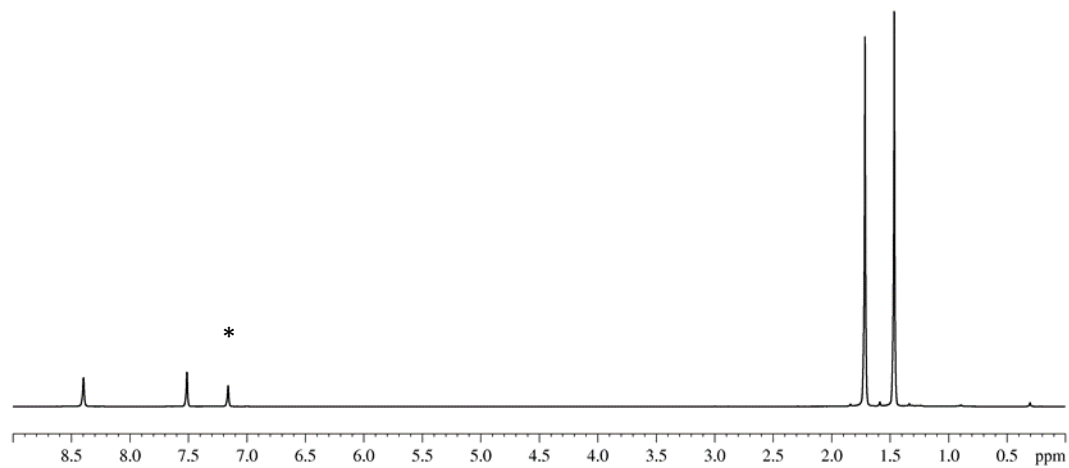

**Figure S2:** <sup>1</sup>H NMR spectrum of **1b** in C<sub>6</sub>D<sub>6</sub> at room temperature (\* denotes NMR solvent residue).

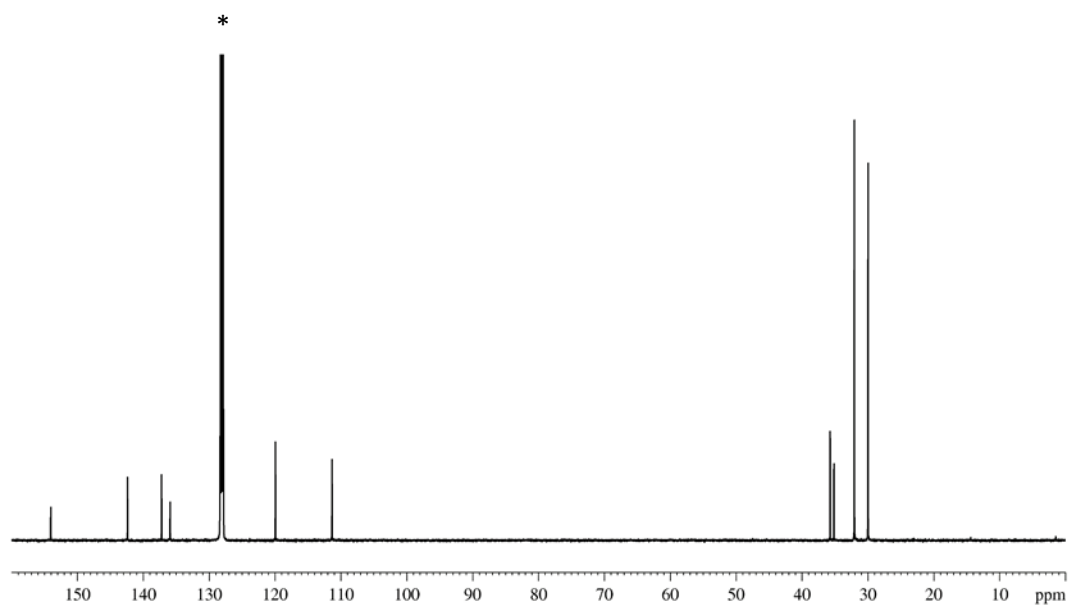

**Figure S3:** <sup>13</sup>C{<sup>1</sup>H} NMR spectrum of **1b** in C<sub>6</sub>D<sub>6</sub> at room temperature (\* denotes NMR solvent residue).

**NMR spectra for [K(18-crown-6)][2a]**

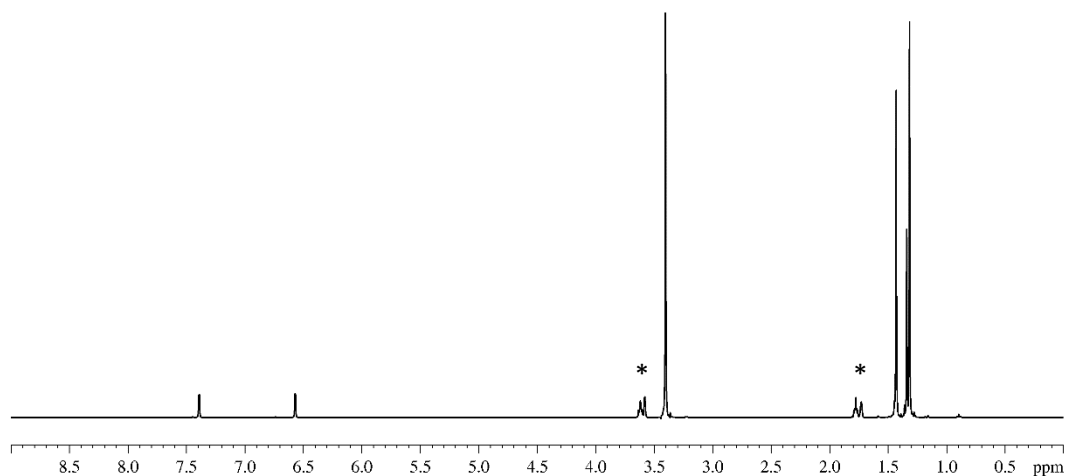

**Figure S4:** <sup>1</sup>H NMR spectrum of [K(18-crown-6)][2a] in d<sub>8</sub>-THF at room temperature (\* denotes residual THF and NMR solvent residue).

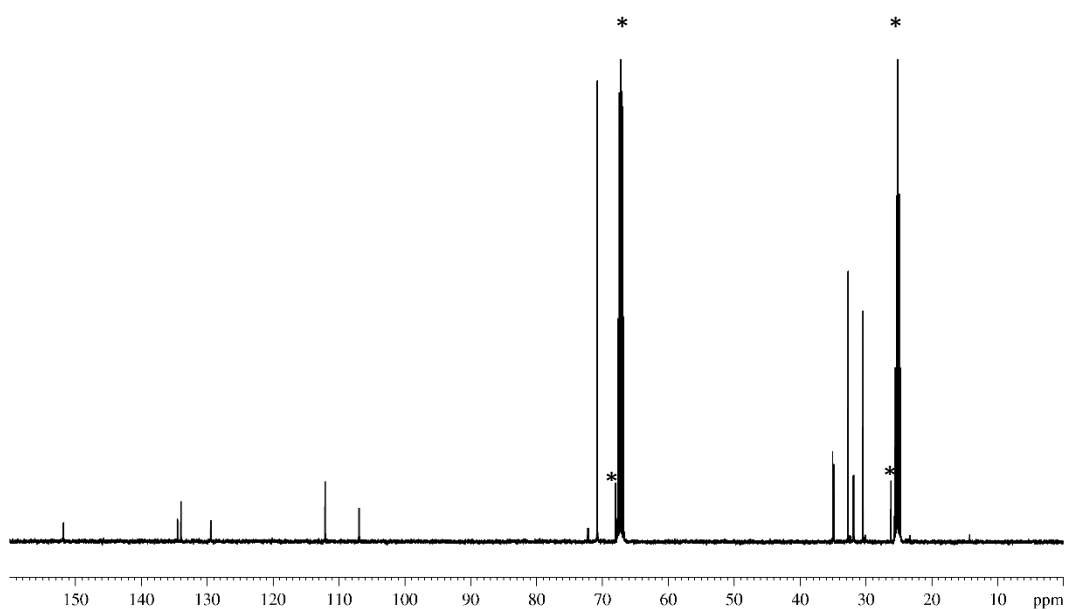

**Figure S5:** <sup>13</sup>C{<sup>1</sup>H} NMR spectrum of [K(18-crown-6)][2a] in d<sub>8</sub>-THF at room temperature (\* denotes residual THF and NMR solvent residue).

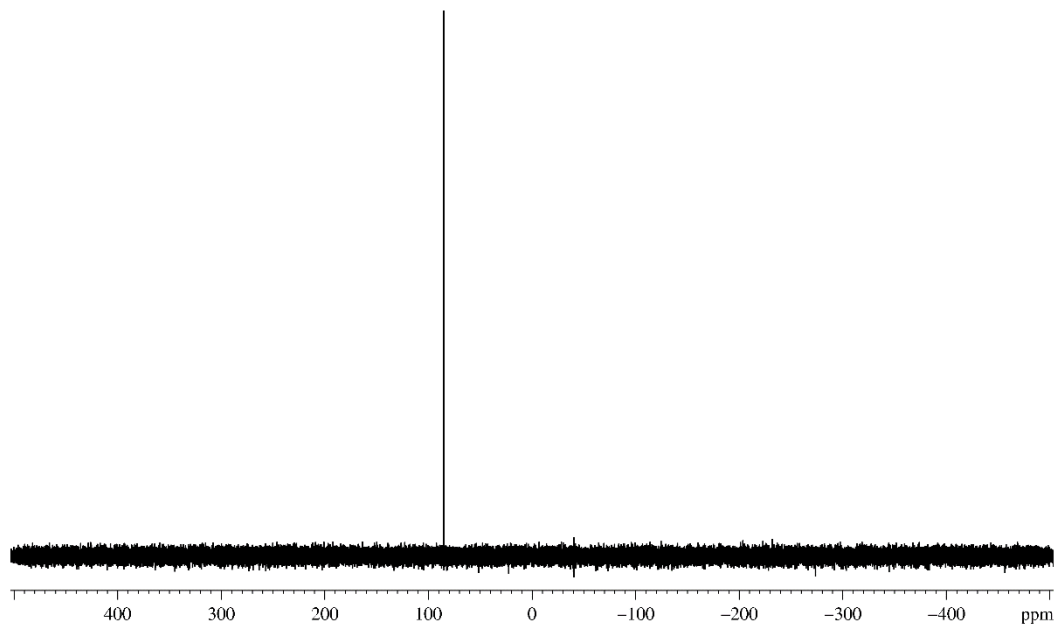

**Figure S6:**  $^{31}\text{P}$  NMR spectrum of  $[\text{K}(18\text{-crown-6})][\mathbf{2a}]$  in  $d_8\text{-THF}$  at room temperature.

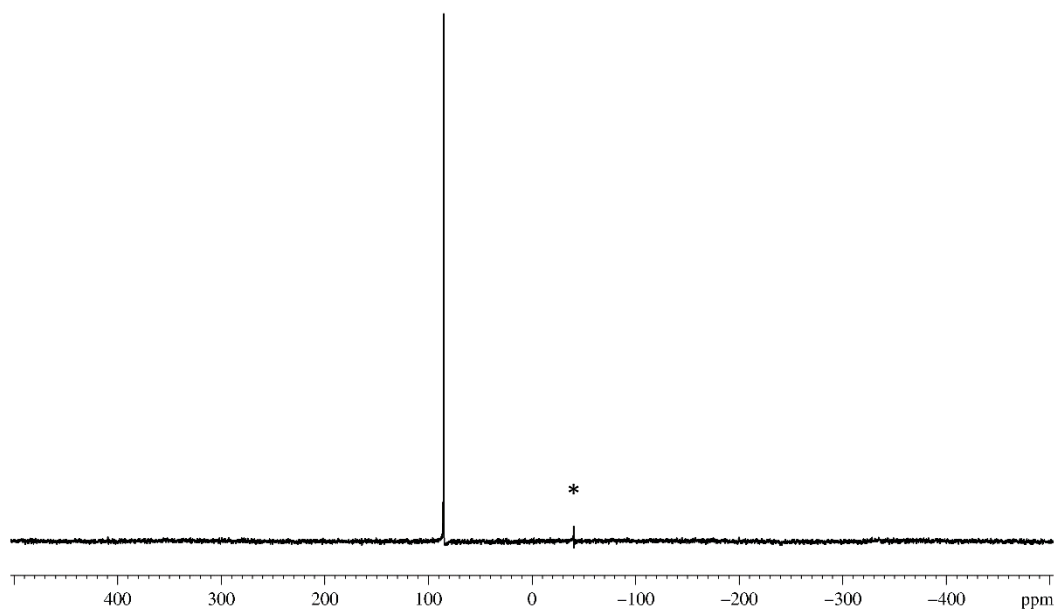

**Figure S7:**  $^{31}\text{P}\{^1\text{H}\}$  NMR spectrum of  $[\text{K}(18\text{-crown-6})][\mathbf{2a}]$  in  $d_8\text{-THF}$  at room temperature

(\* Denotes trace amount of  $(t\text{BuO})\text{HP}(\text{ONO})$ ).

**NMR spectra for [K(18-crown-6)][2b]**

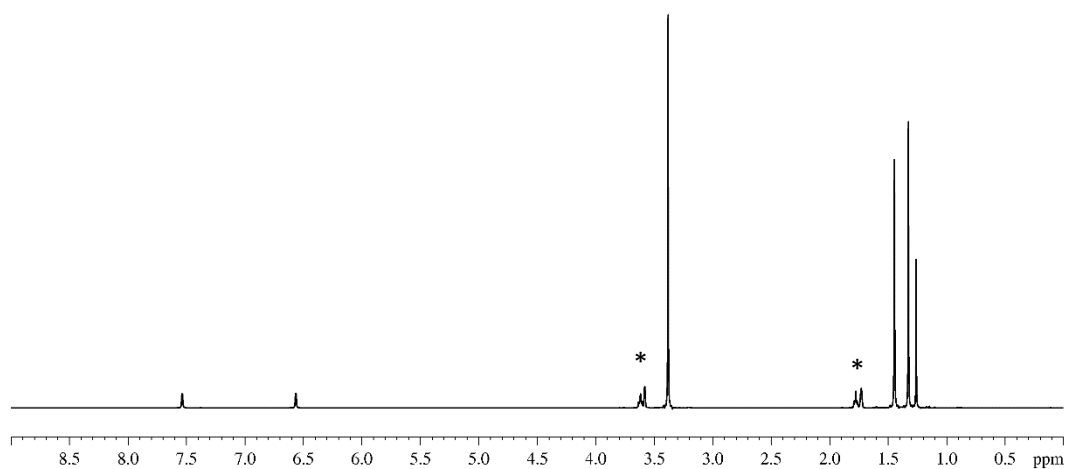

**Figure S8:**  $^1\text{H}$  NMR spectrum of [K(18-crown-6)][**2b**] in  $d_8$ -THF at room temperature (\* denotes residual THF and NMR solvent residue).

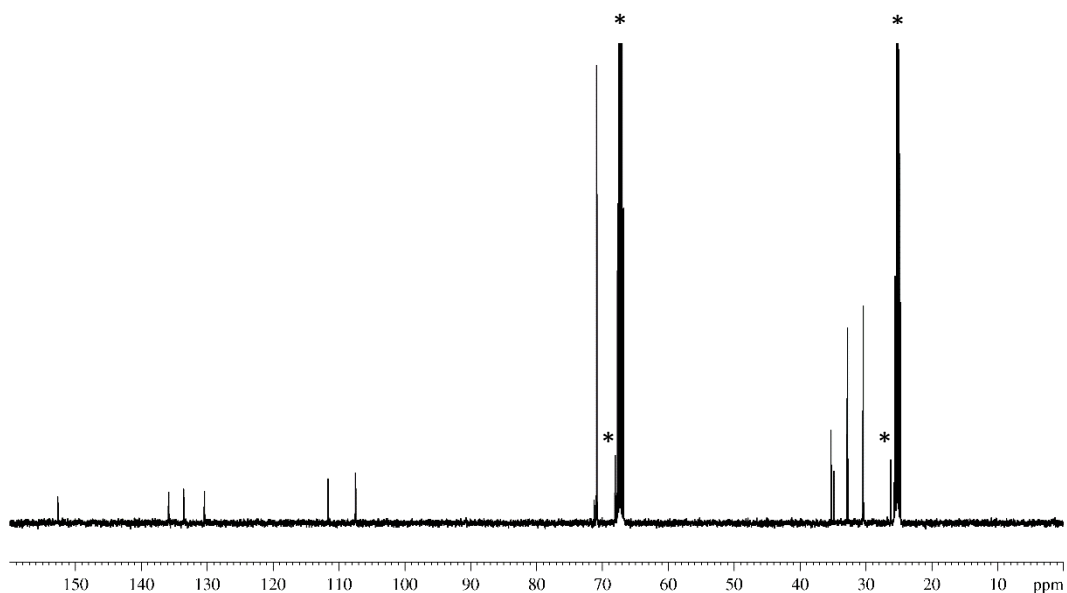

**Figure S9:**  $^{13}\text{C}\{^1\text{H}\}$  NMR spectrum of [K(18-crown-6)][**2b**] in  $d_8$ -THF at room temperature (\* denotes residual THF and NMR solvent residue).

### NMR spectra for [K(18-crown-6)][3a]

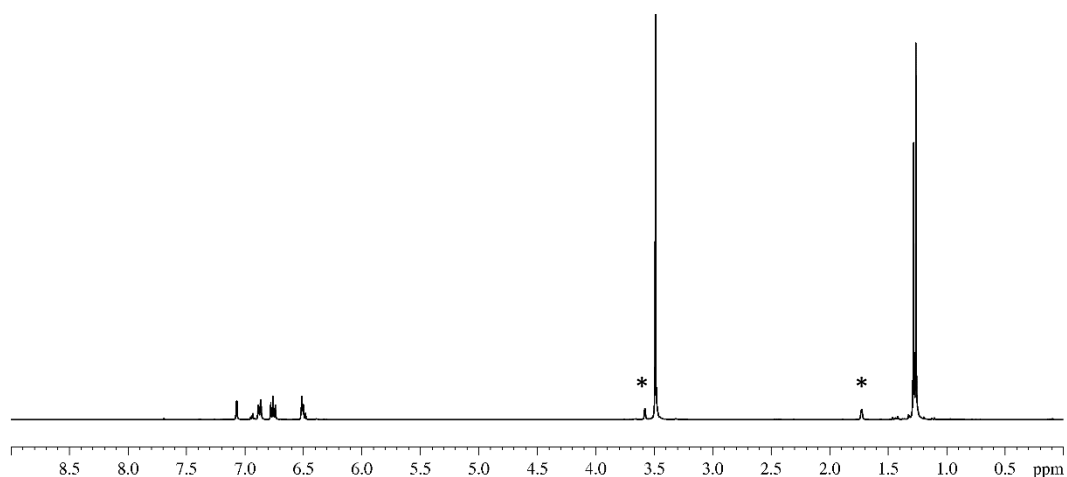

**Figure S10:**  $^1\text{H}$  NMR spectrum of *in situ* synthesised [K(18-crown-6)][**3a**] in  $d_8$ -THF at room temperature (\* denotes NMR solvent residue).

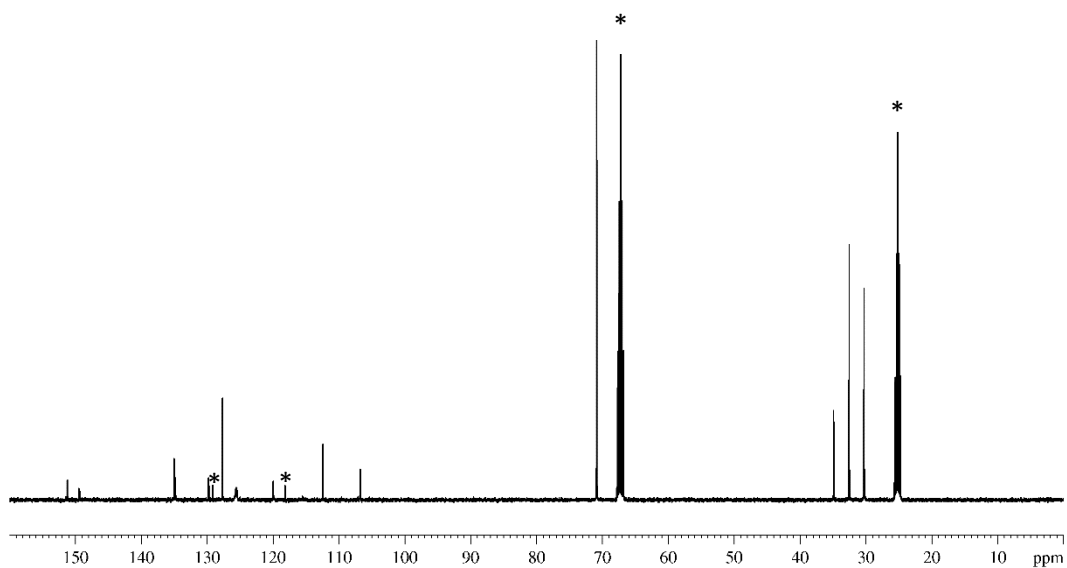

**Figure S11:**  $^{13}\text{C}\{^1\text{H}\}$  NMR spectrum of *in situ* synthesised [K(18-crown-6)][**3a**] in  $d_8$ -THF at room temperature (\* denotes NMR solvent residue and slight  $[\text{NPh}_2]^-$  impurity).

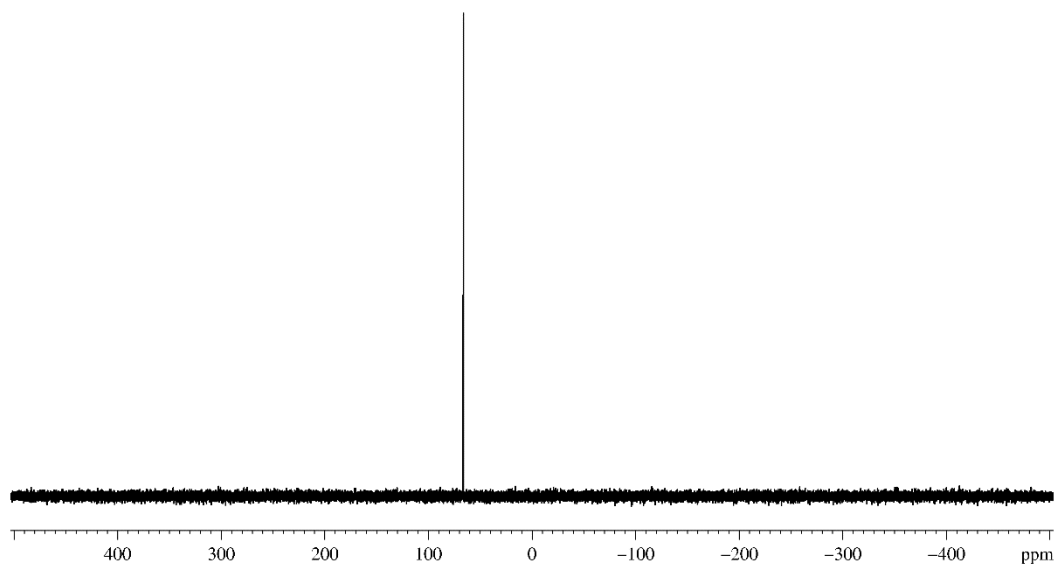

**Figure S12:**  $^{31}\text{P}$  NMR spectrum of *in situ* synthesised [K(18-crown-6)][**3a**] in  $d_8$ -THF at room temperature.

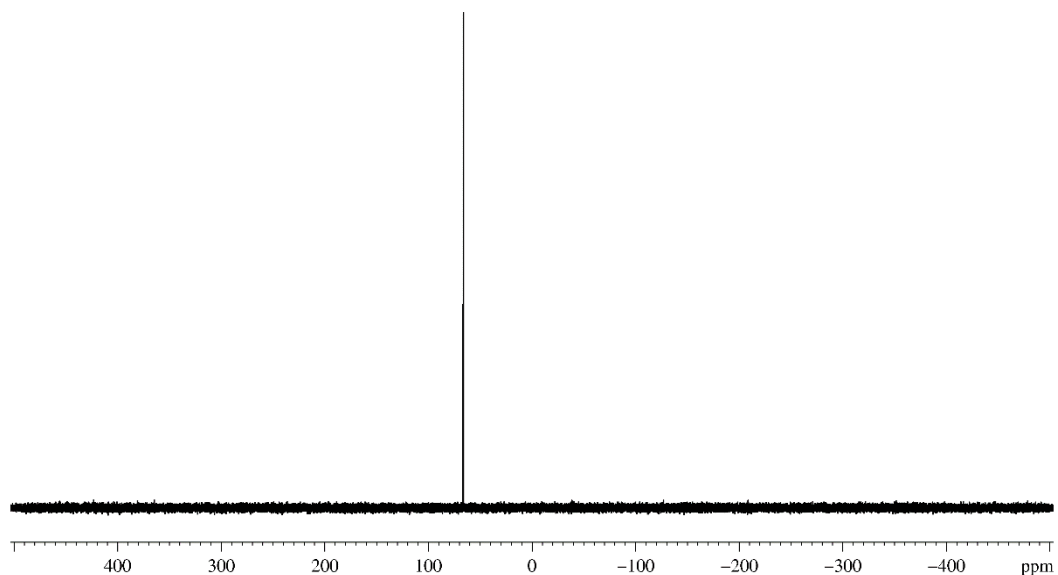

**Figure S13:**  $^{31}\text{P}\{^1\text{H}\}$  NMR spectrum of *in situ* synthesised [K(18-crown-6)][**3a**] in  $d_8$ -THF at room temperature.

**NMR spectra for [K(2,2,2-crypt)][3b]**

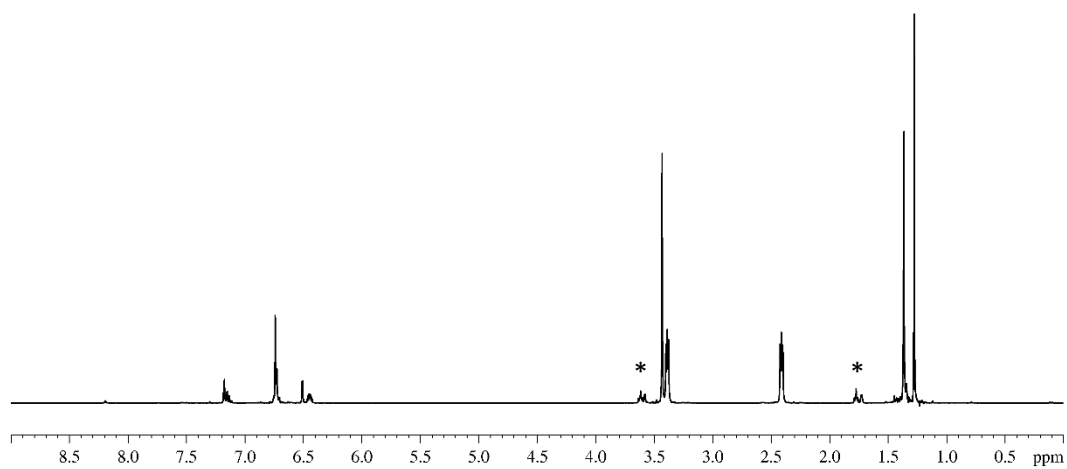

**Figure S14:**  $^1\text{H}$  NMR spectrum of [K(2,2,2-crypt)][**3b**] in  $d_8$ -THF at room temperature (\* denotes residual THF and NMR solvent residue).

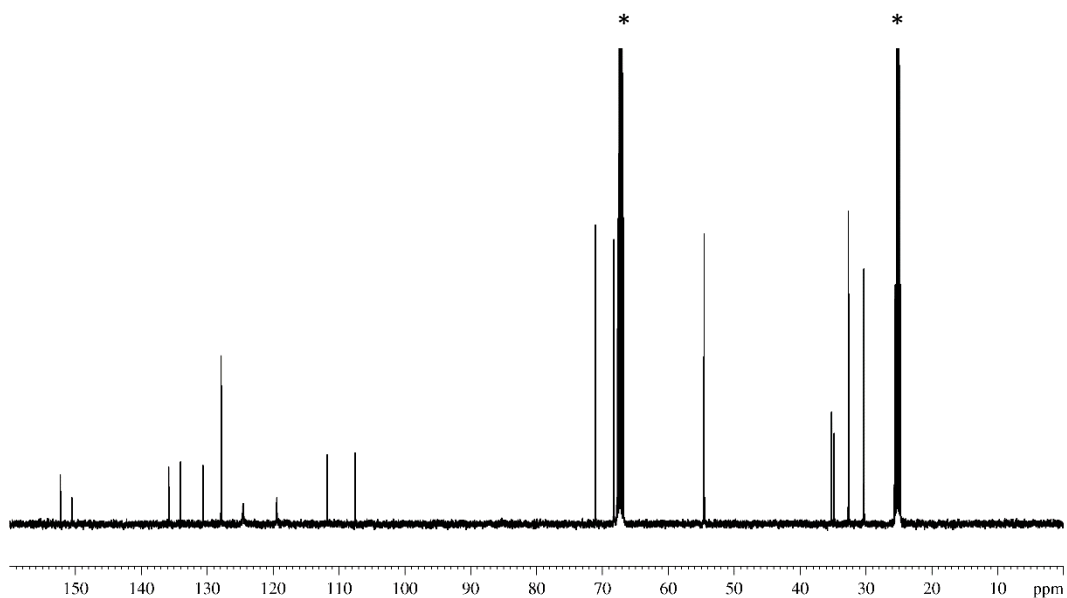

**Figure S15:**  $^{13}\text{C}\{^1\text{H}\}$  NMR spectrum of [K(2,2,2-crypt)][**3b**] in  $d_8$ -THF at room temperature (\* NMR solvent residue).



## NMR spectra for 4a

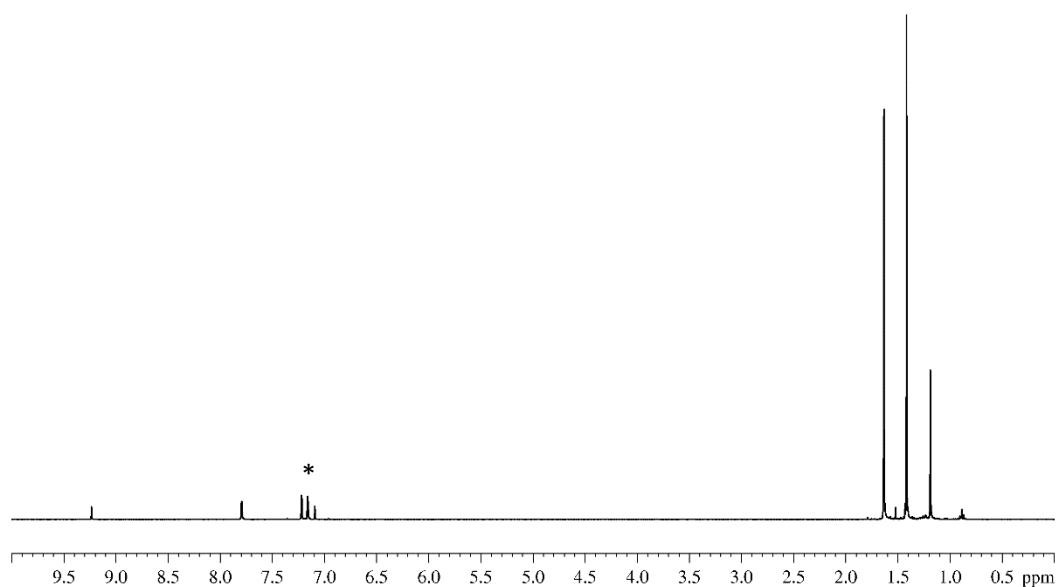

**Figure S16:**  $^1\text{H}$  NMR spectrum of **4a** in  $\text{C}_6\text{D}_6$  at room temperature (\* denotes NMR solvent residue).

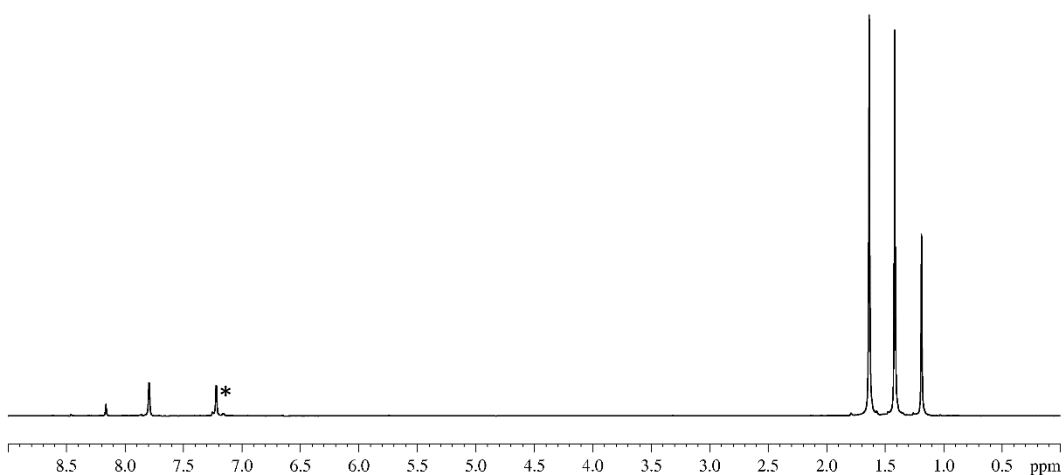

**Figure S17:**  $^1\text{H}\{^{31}\text{P}\}$  NMR spectrum of **4a** in  $\text{C}_6\text{D}_6$  at room temperature (\* denotes NMR solvent residue).

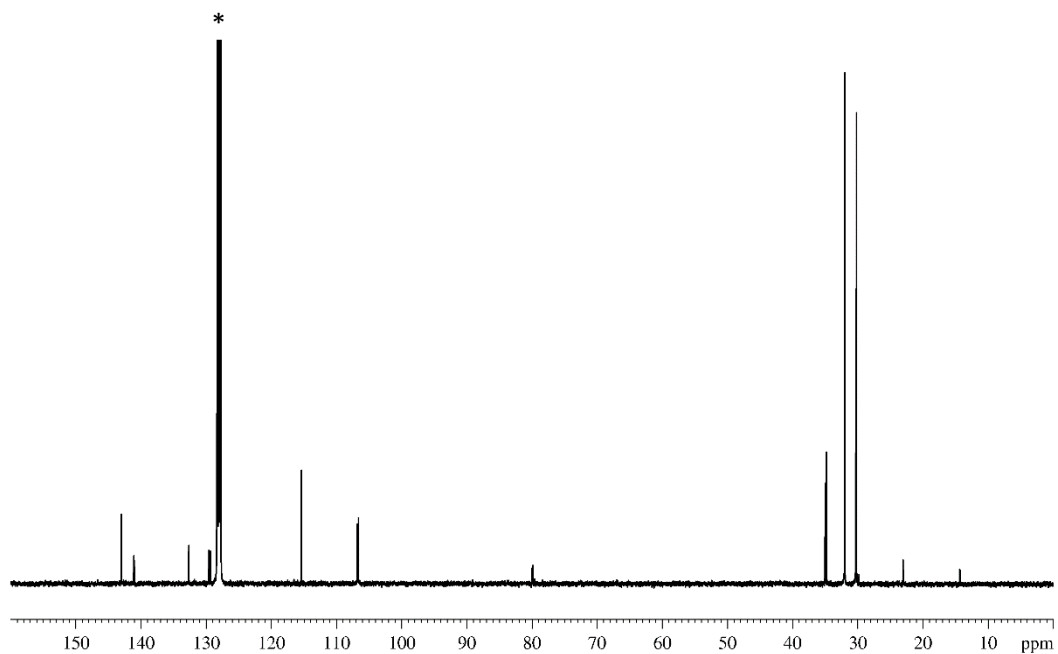

**Figure S18:**  $^{13}\text{C}\{^1\text{H}\}$  NMR spectrum of **4a** in  $\text{C}_6\text{D}_6$  at room temperature (\* denotes NMR solvent residue).

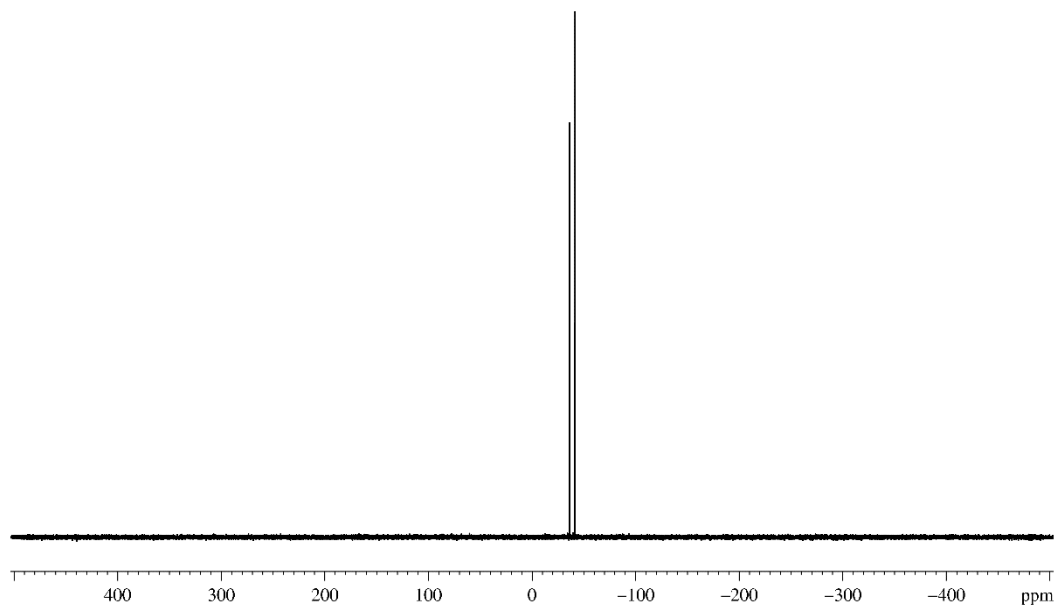

**Figure S19:**  $^{31}\text{P}$  NMR spectrum of **4a** in  $\text{C}_6\text{D}_6$  at room temperature.

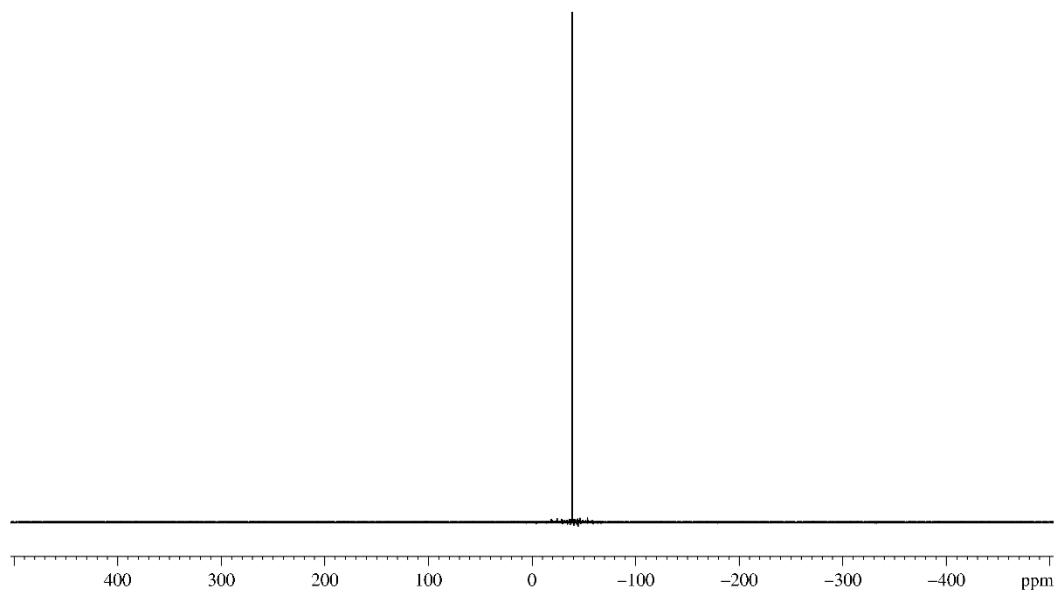

**Figure S20:**  $^{31}\text{P}\{^1\text{H}\}$  NMR spectrum of **4a** in  $\text{C}_6\text{D}_6$  at room temperature.

**NMR spectra for 5a**

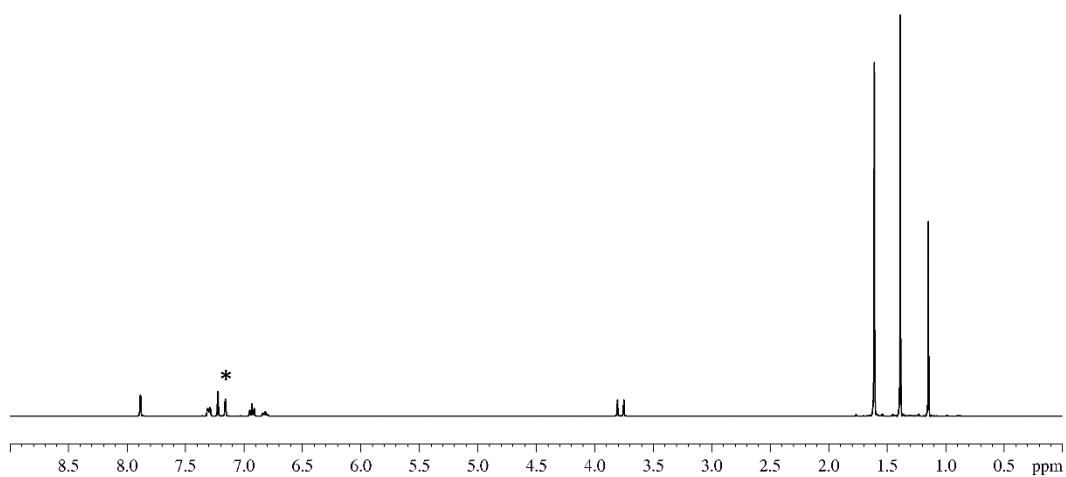

**Figure S21:**  $^1\text{H}$  NMR spectrum of **5a** in  $\text{C}_6\text{D}_6$  at room temperature (\* denotes NMR solvent residue).

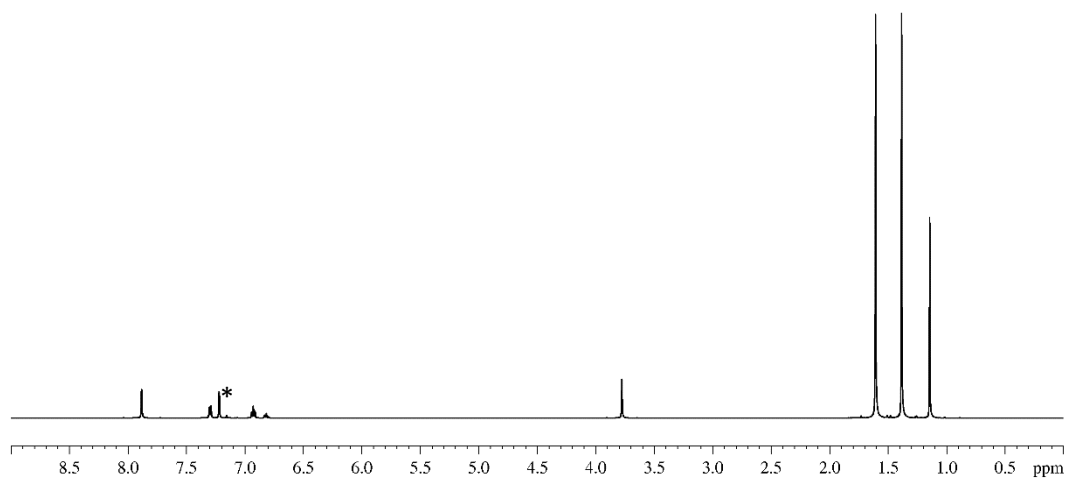

**Figure S22:**  $^1\text{H}\{^{31}\text{P}\}$  NMR spectrum of **5a** in  $\text{C}_6\text{D}_6$  at room temperature (\* denotes NMR solvent residue).

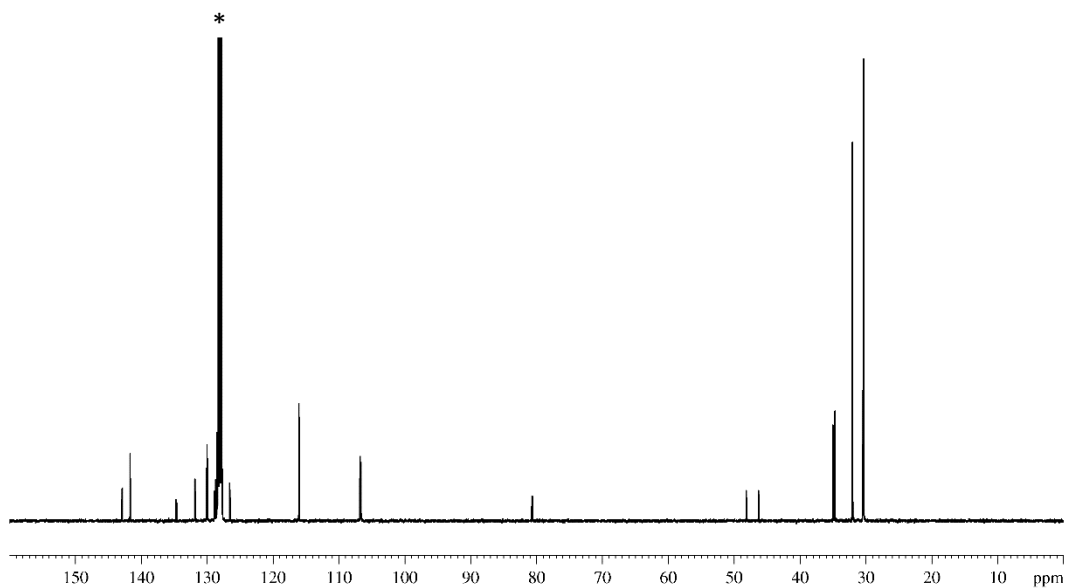

**Figure S23:**  $^{13}\text{C}\{^1\text{H}\}$  NMR spectrum of **5a** in  $\text{C}_6\text{D}_6$  at room temperature (\* denotes NMR solvent residue).

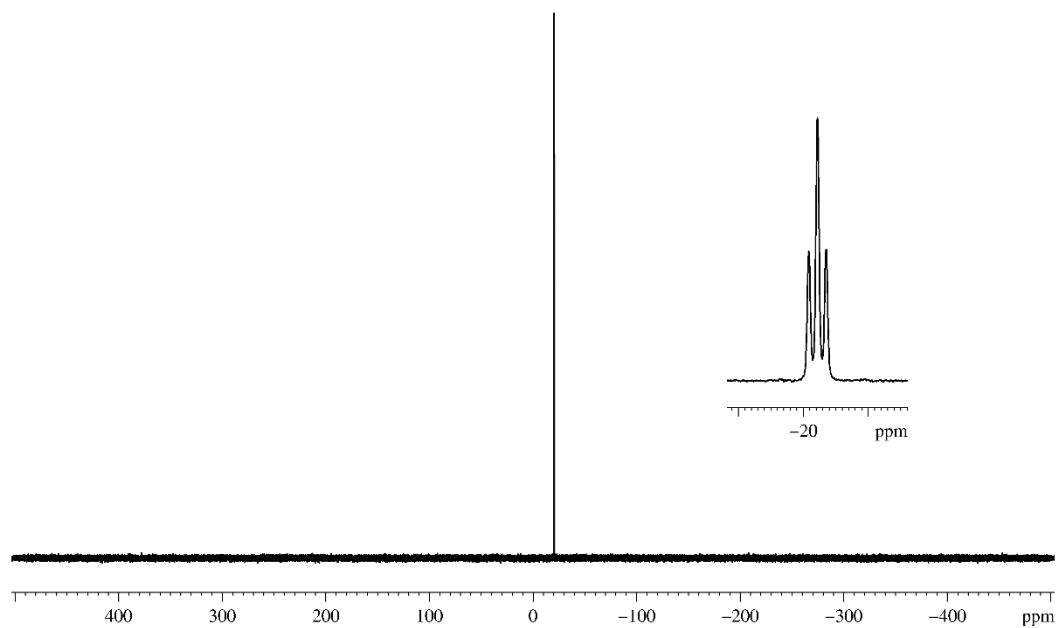

**Figure S24:**  $^{31}\text{P}$  NMR spectrum of **5a** in  $\text{C}_6\text{D}_6$  at room temperature with inset showing the triplet multiplicity.

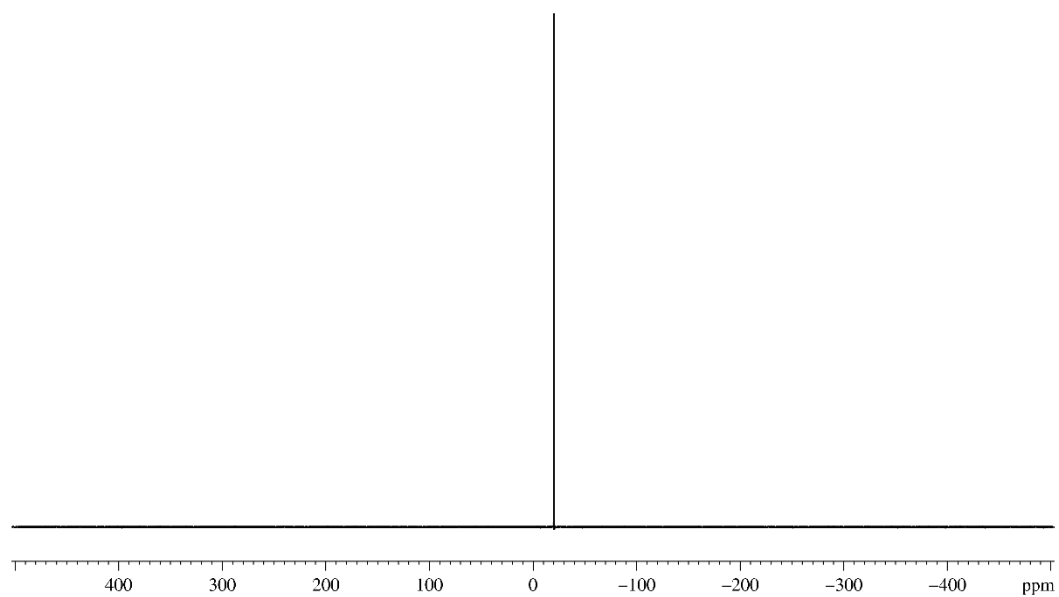

**Figure S25:**  $^{31}\text{P}\{^1\text{H}\}$  NMR spectrum of **5a** in  $\text{C}_6\text{D}_6$  at room temperature.

## NMR spectra for [6a][OTf]

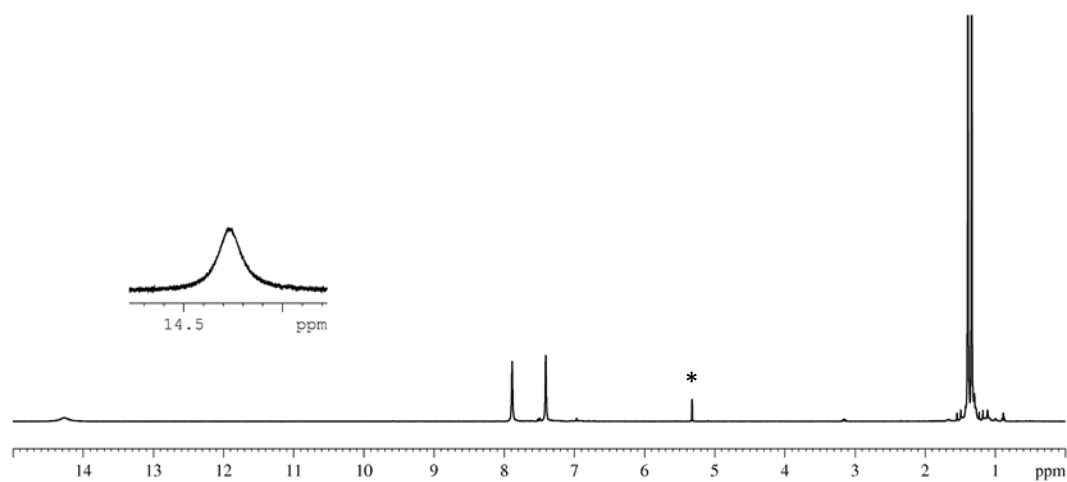

**Figure S26:**  $^1\text{H}$  NMR spectrum of [6a][OTf] in  $\text{CD}_2\text{Cl}_2$  at room temperature (\* denotes NMR solvent residue).

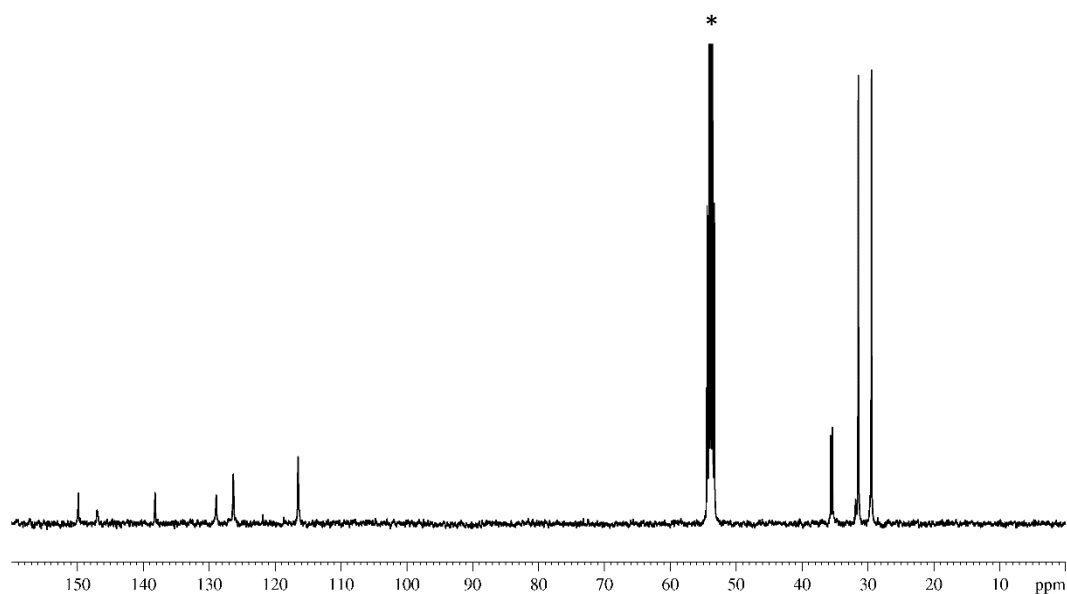

**Figure S27:**  $^{13}\text{C}\{^1\text{H}\}$  NMR spectrum of [6a][OTf] in  $\text{CD}_2\text{Cl}_2$  at room temperature (\* denotes NMR solvent residue).

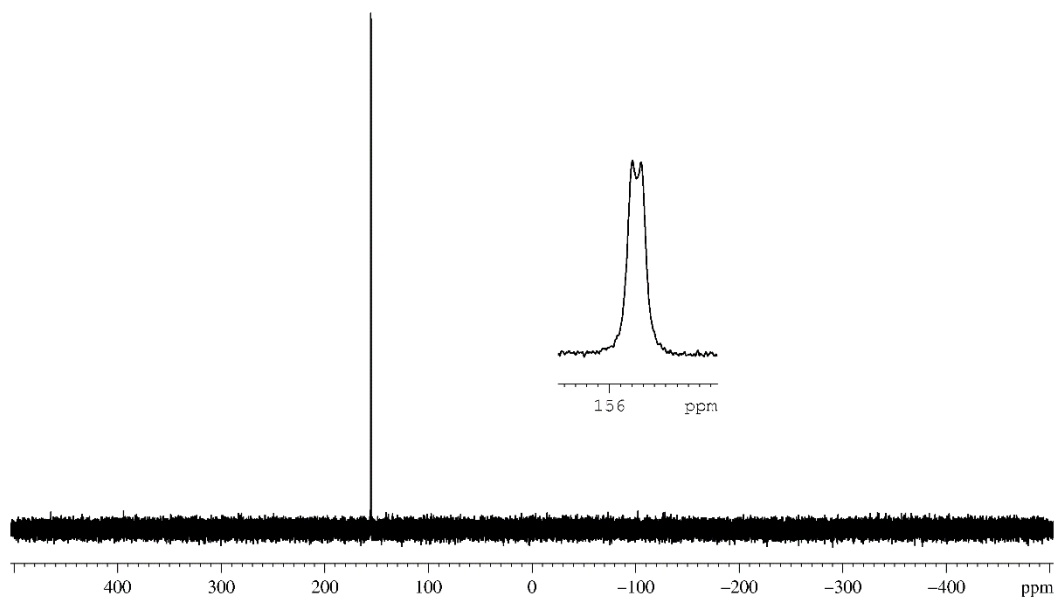

**Figure S28:**  $^{31}\text{P}$  NMR spectrum of **[6a][OTf]** in  $\text{CD}_2\text{Cl}_2$  at room temperature with inset showing the doublet multiplicity.

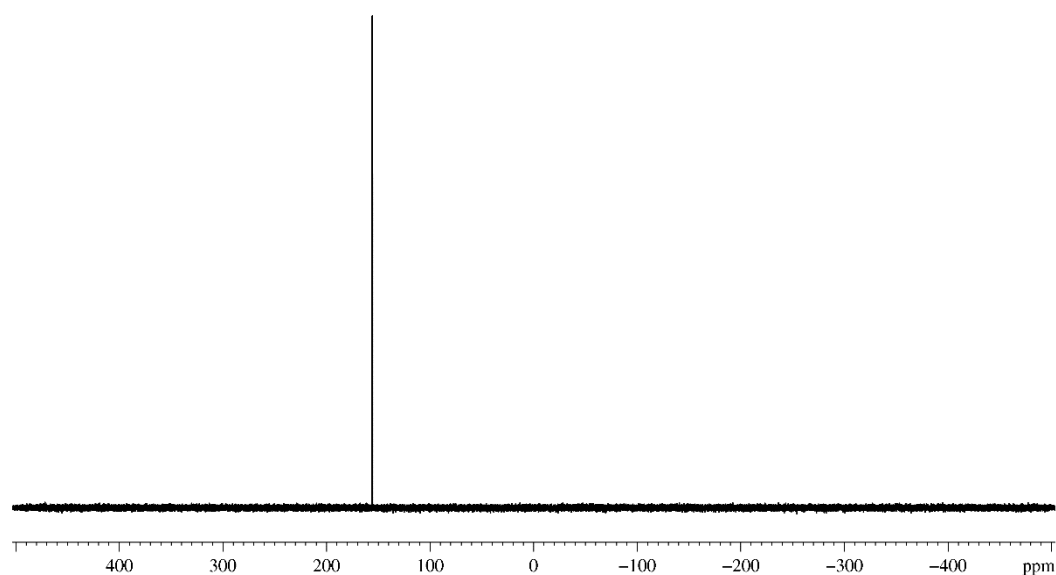

**Figure S29:**  $^{31}\text{P}\{^1\text{H}\}$  NMR spectrum of **[6a][OTf]** in  $\text{CD}_2\text{Cl}_2$  at room temperature.

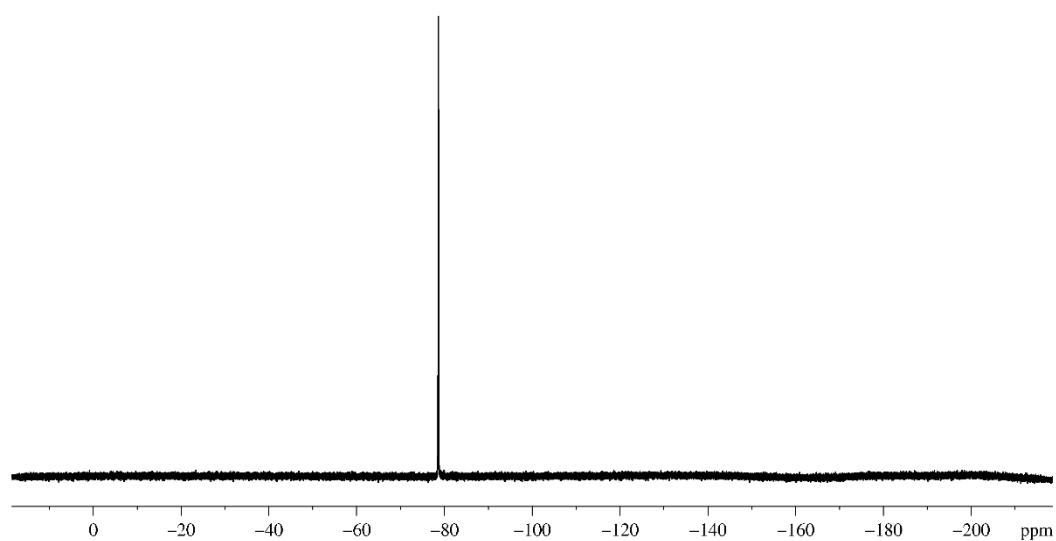

**Figure S30:**  $^{19}\text{F}$  NMR spectrum of **6a** in  $\text{CD}_2\text{Cl}_2$  at room temperature.

**NMR spectra for [6b][OTf]**

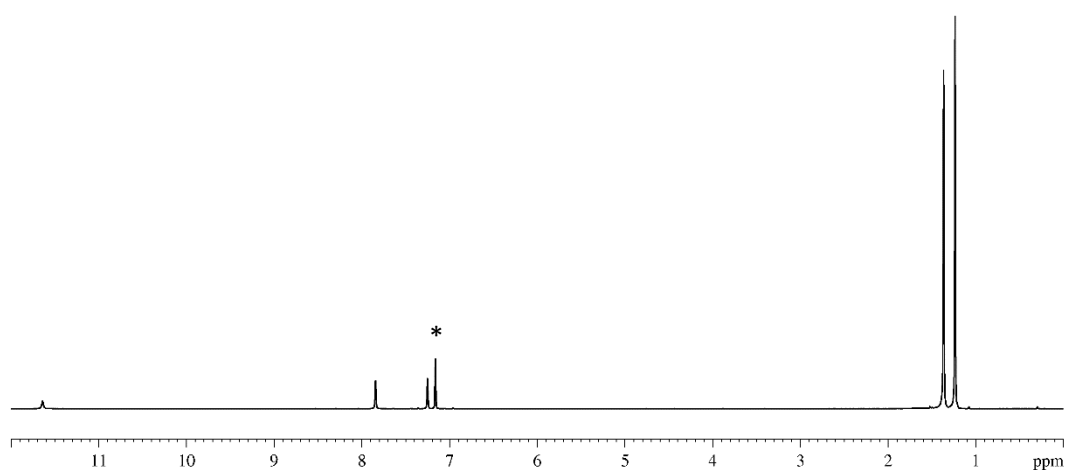

**Figure S31:**  $^1\text{H}$  NMR spectrum of **[6b][OTf]** in  $\text{C}_6\text{D}_6$  at room temperature (\* denotes NMR solvent residue).



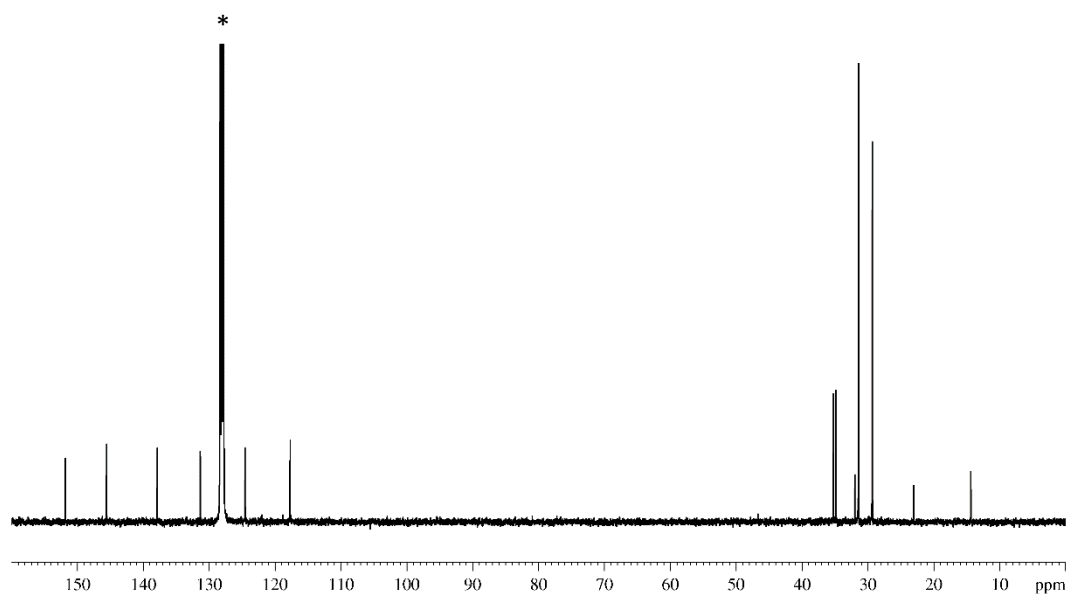

**Figure S32:**  $^{13}\text{C}\{^1\text{H}\}$  NMR spectrum of **[6b]**[OTf] in  $\text{C}_6\text{D}_6$  at room temperature (\* denotes NMR solvent residue).

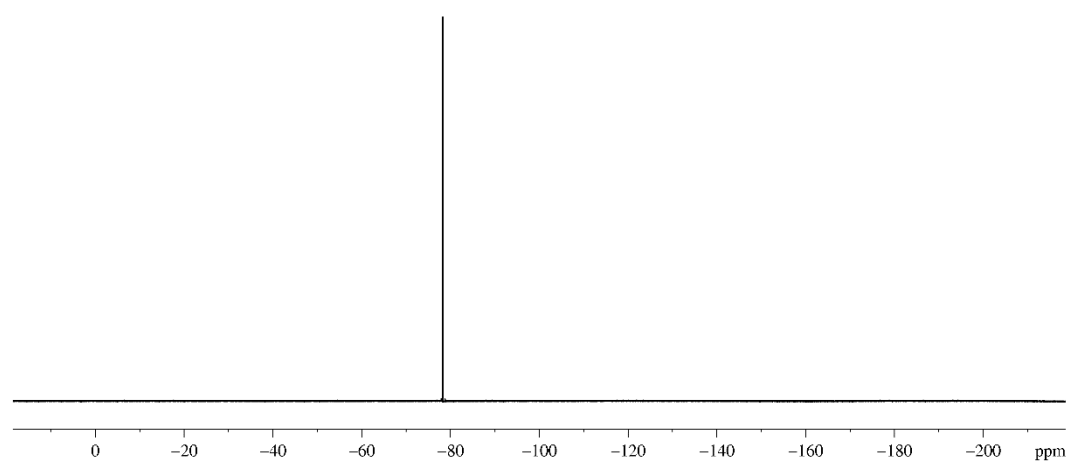

**Figure S33:**  $^{19}\text{F}$  NMR spectrum of **[6b]**[OTf] in  $\text{C}_6\text{D}_6$  at room temperature.

**NMR spectra for [7a][OTf]**

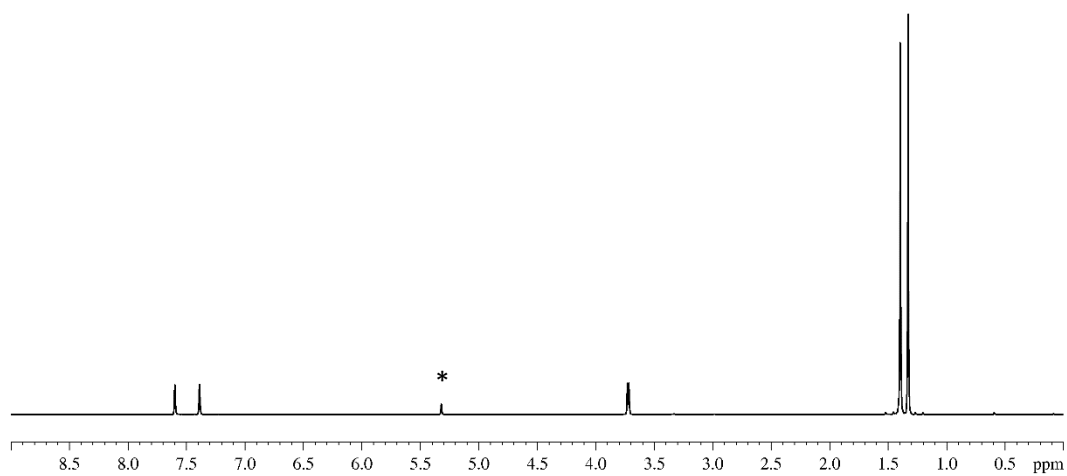

**Figure S34:**  $^1\text{H}$  NMR spectrum of [7a][OTf] in  $\text{CD}_2\text{Cl}_2$  at room temperature (\* denotes NMR solvent residue).

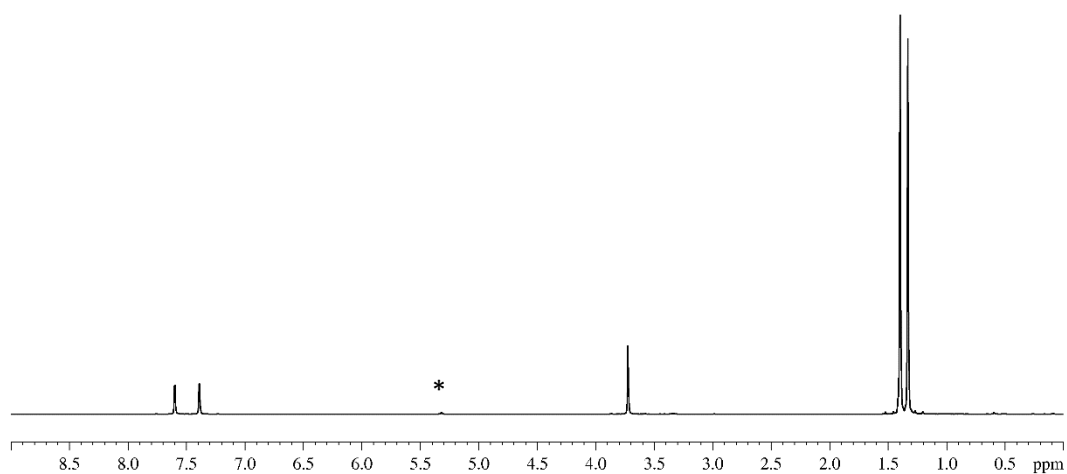

**Figure S35:**  $^1\text{H}\{^{31}\text{P}\}$  NMR spectrum of [7a][OTf] in  $\text{CD}_2\text{Cl}_2$  at room temperature (\* denotes NMR solvent residue).

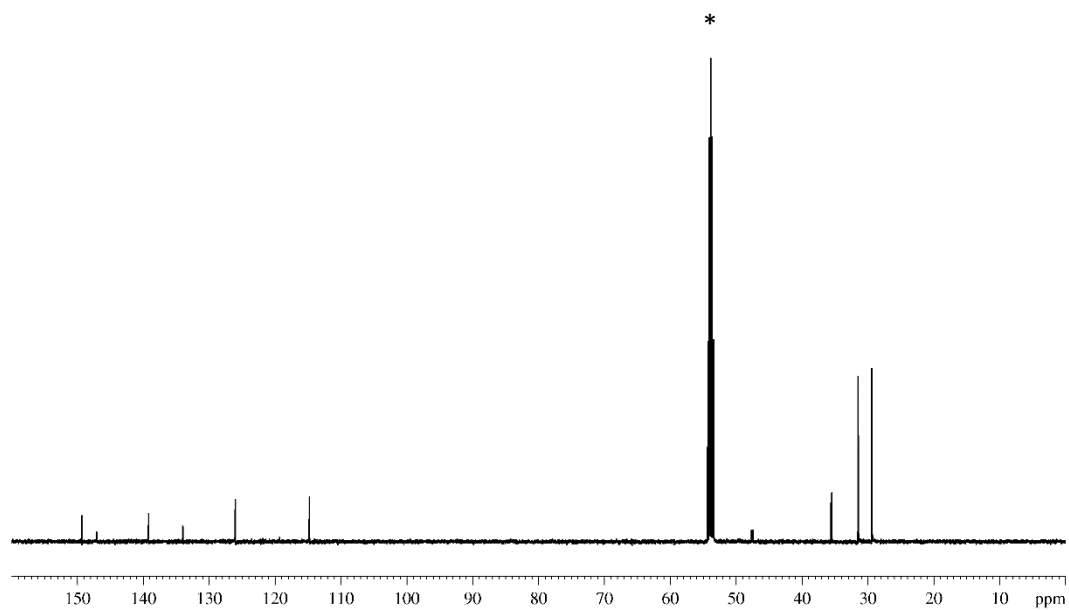

**Figure S36:**  $^{13}\text{C}\{^1\text{H}\}$  NMR spectrum of [7a][OTf] in  $\text{CD}_2\text{Cl}_2$  at room temperature (\* denotes NMR solvent residue).

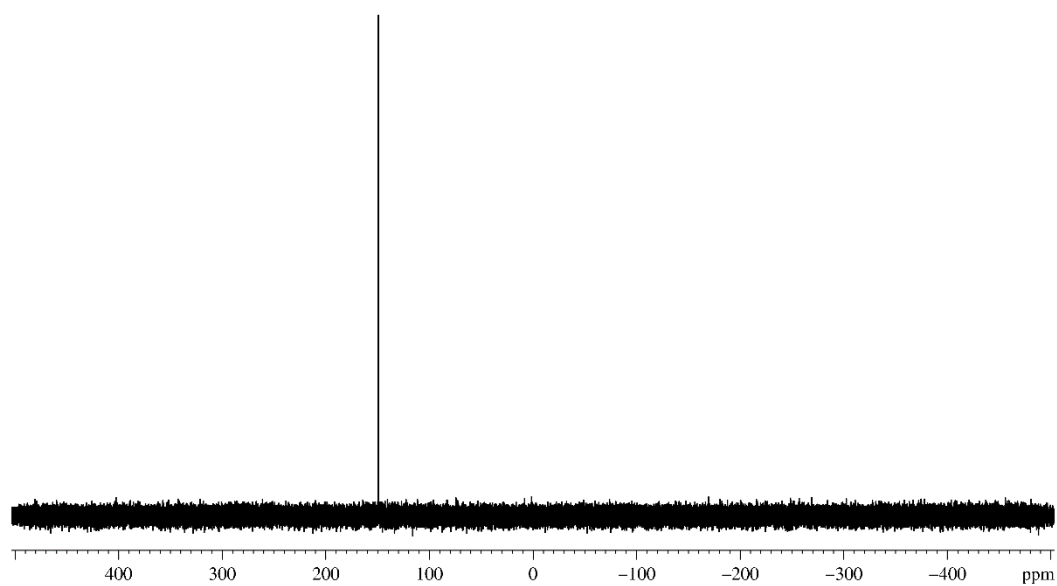

**Figure S37:**  $^{31}\text{P}$  NMR spectrum of [7a][OTf] in  $\text{CD}_2\text{Cl}_2$  at room temperature.

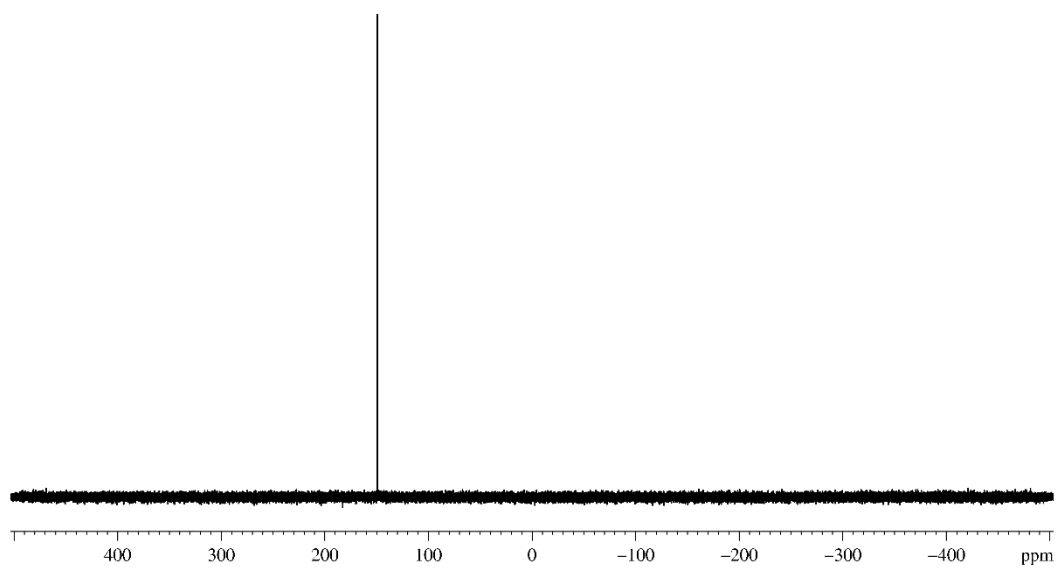

**Figure S38:**  $^{31}\text{P}\{^1\text{H}\}$  NMR spectrum of **[7a][OTf]** in  $\text{CD}_2\text{Cl}_2$  at room temperature.

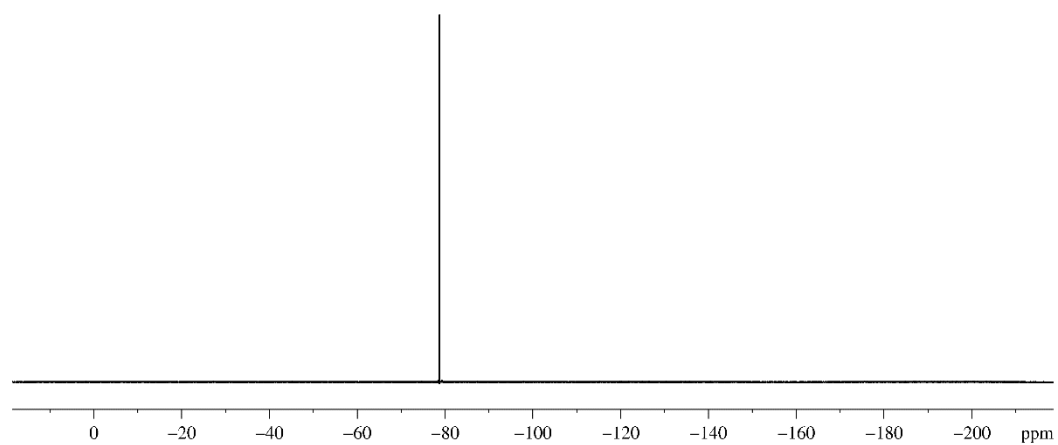

**Figure S39:**  $^{19}\text{F}$  NMR spectrum of **[7a][OTf]** in  $\text{CD}_2\text{Cl}_2$  at room temperature.

**NMR spectra for [7b][OTf]**

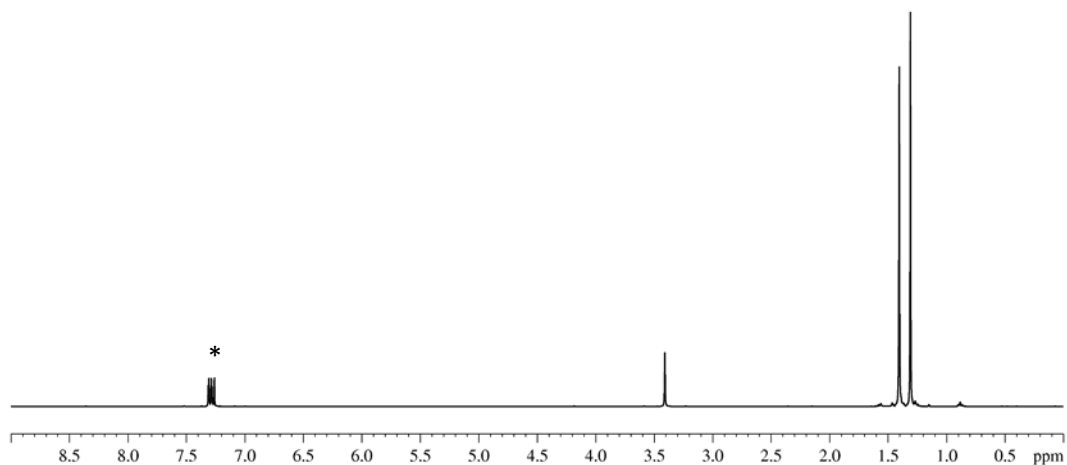

**Figure S40:** <sup>1</sup>H NMR spectrum of [7b][OTf] in CDCl<sub>3</sub> at room temperature (\* denotes NMR solvent residue).

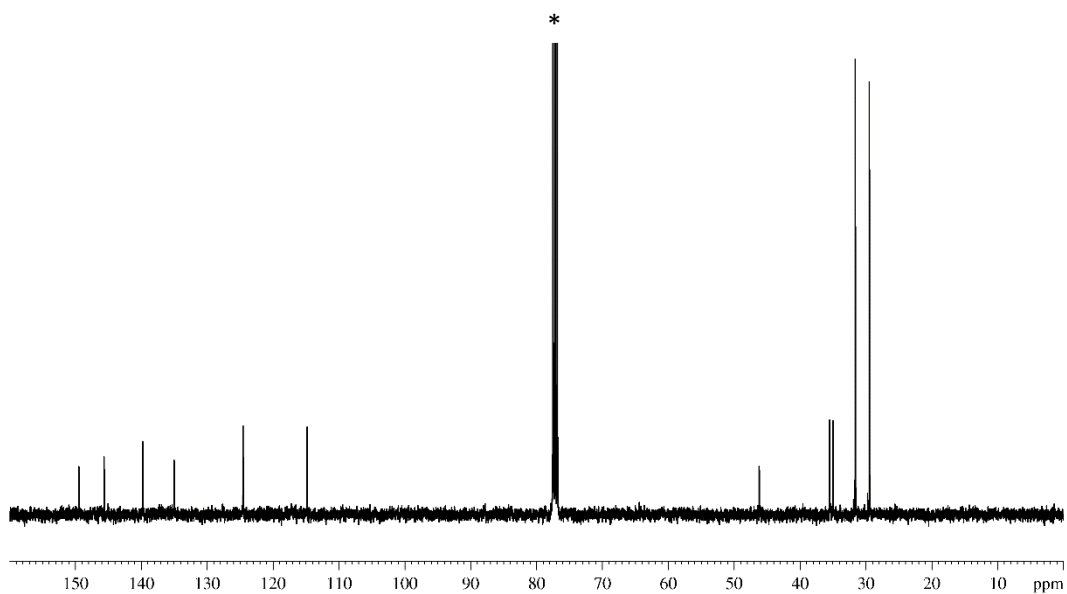

**Figure S41:** <sup>13</sup>C{<sup>1</sup>H} NMR spectrum of [7b][OTf] in CDCl<sub>3</sub> at room temperature (\* denotes NMR solvent residue).

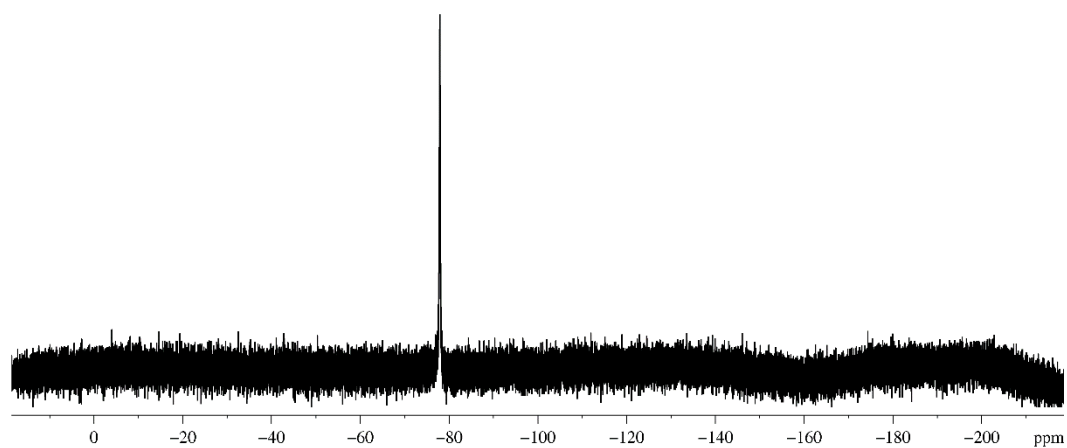

**Figure S42:**  $^{19}\text{F}$  NMR spectrum of **[7b]**[OTf] in  $\text{CDCl}_3$  at room temperature.

**NMR spectra for 8a**

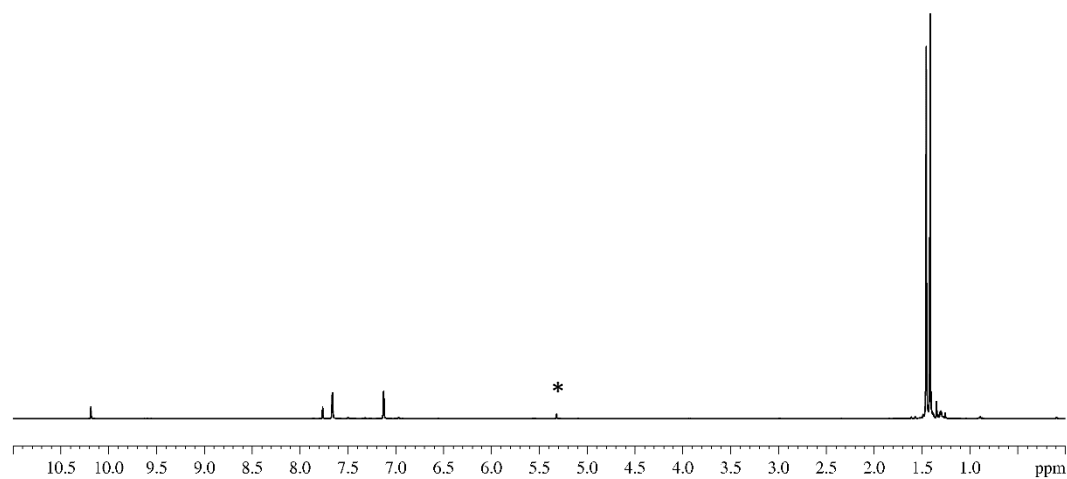

**Figure S43:**  $^1\text{H}$  NMR spectrum of **8a** in  $\text{CD}_2\text{Cl}_2$  at room temperature (\* denotes NMR solvent residue).

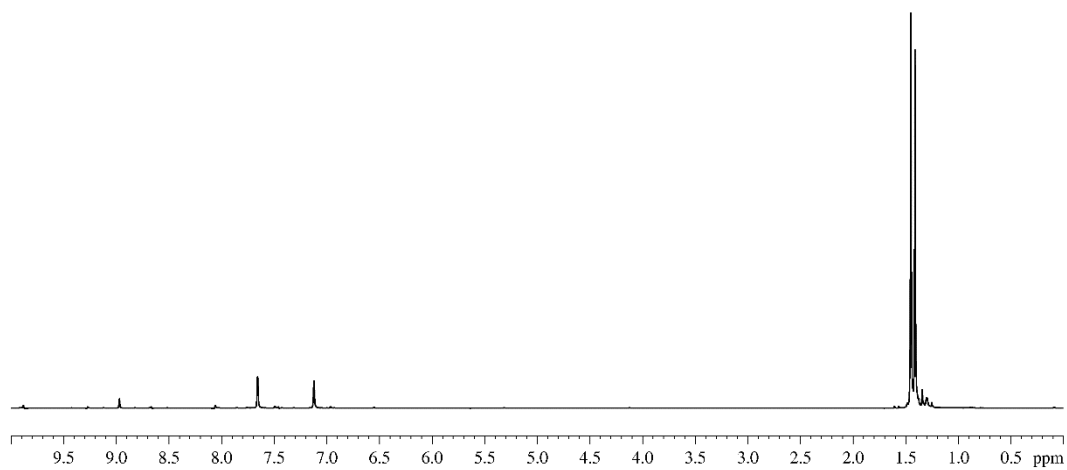

**Figure S44:**  $^1\text{H}\{^{31}\text{P}\}$  NMR spectrum of **8a** in  $\text{CD}_2\text{Cl}_2$  at room temperature.

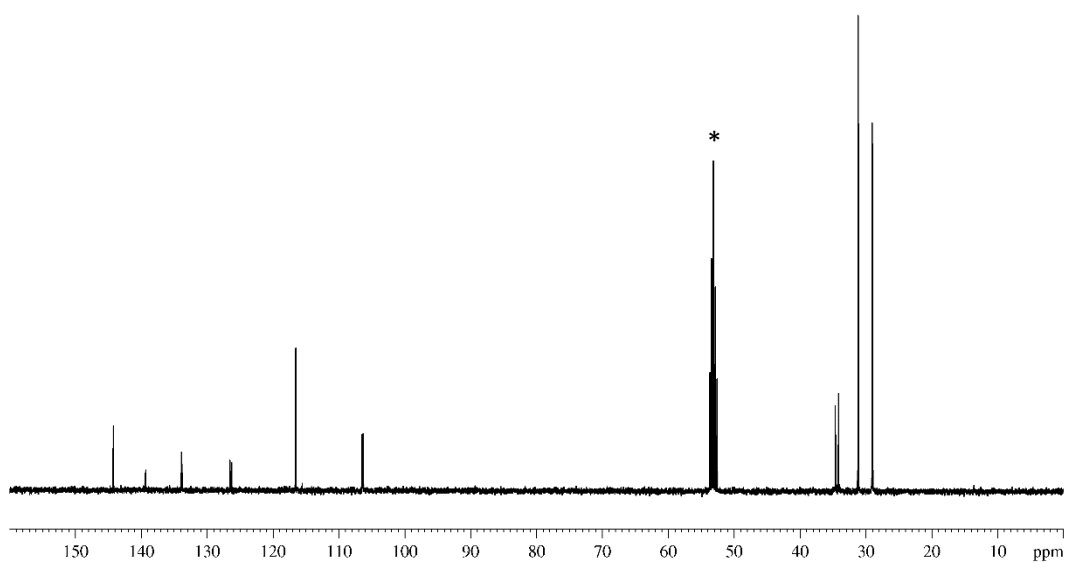

**Figure S45:**  $^{13}\text{C}\{^1\text{H}\}$  NMR spectrum of **8a** in  $\text{CD}_2\text{Cl}_2$  at room (\* denotes NMR solvent residue).

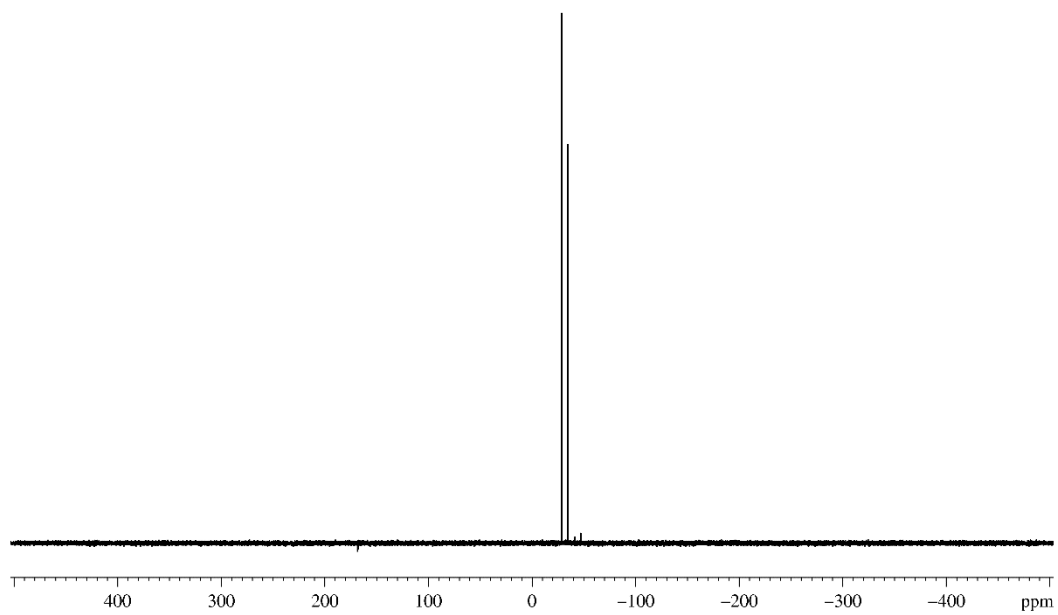

**Figure S46:**  $^{31}\text{P}$  NMR spectrum of **8a** in  $\text{CD}_2\text{Cl}_2$  at room temperature.

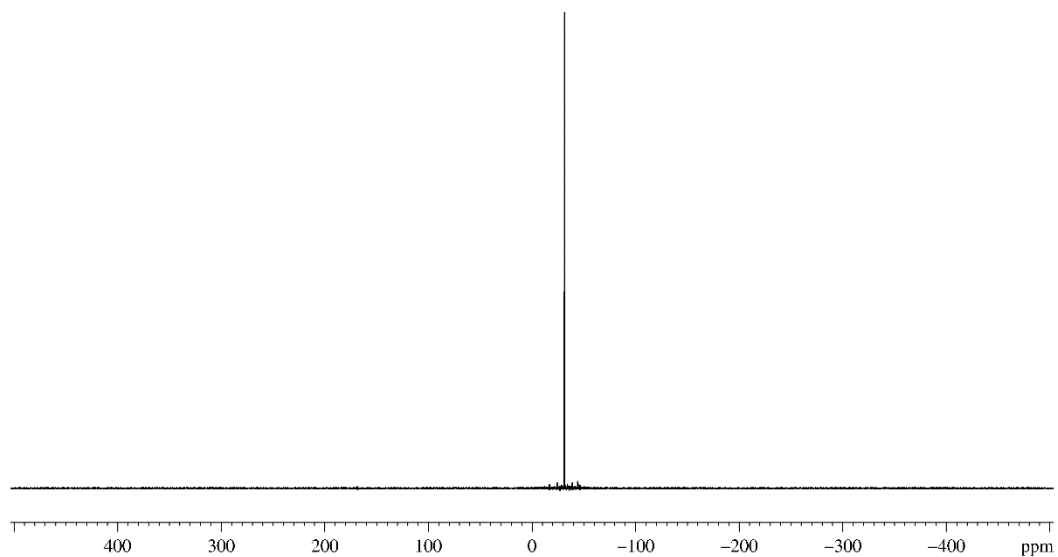

**Figure S47:**  $^{31}\text{P}\{^1\text{H}\}$  NMR spectrum of **8a** in  $\text{CD}_2\text{Cl}_2$  at room temperature.



## NMR spectra for 8b

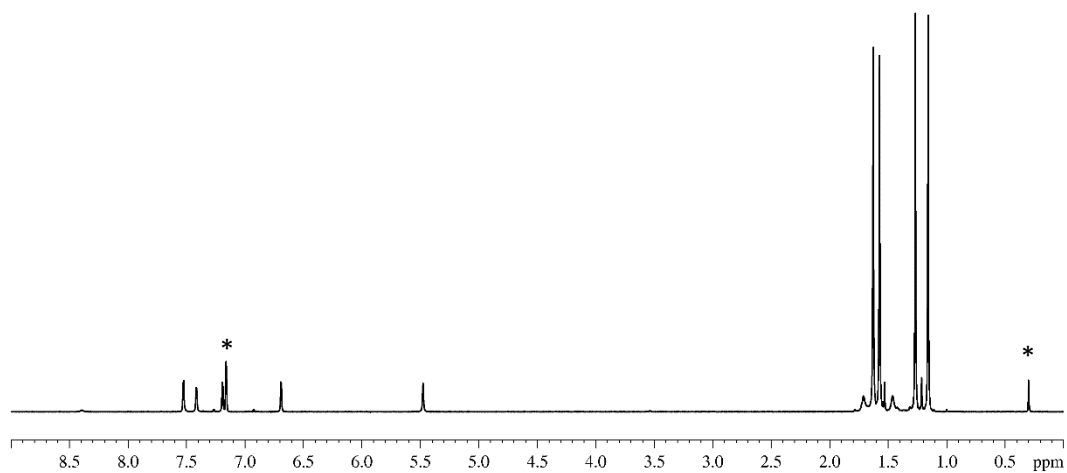

**Figure S48:**  $^1\text{H}$  NMR spectrum of **8b** in  $\text{C}_6\text{D}_6$  at room temperature (\* denotes NMR solvent residue and silicone grease impurity).

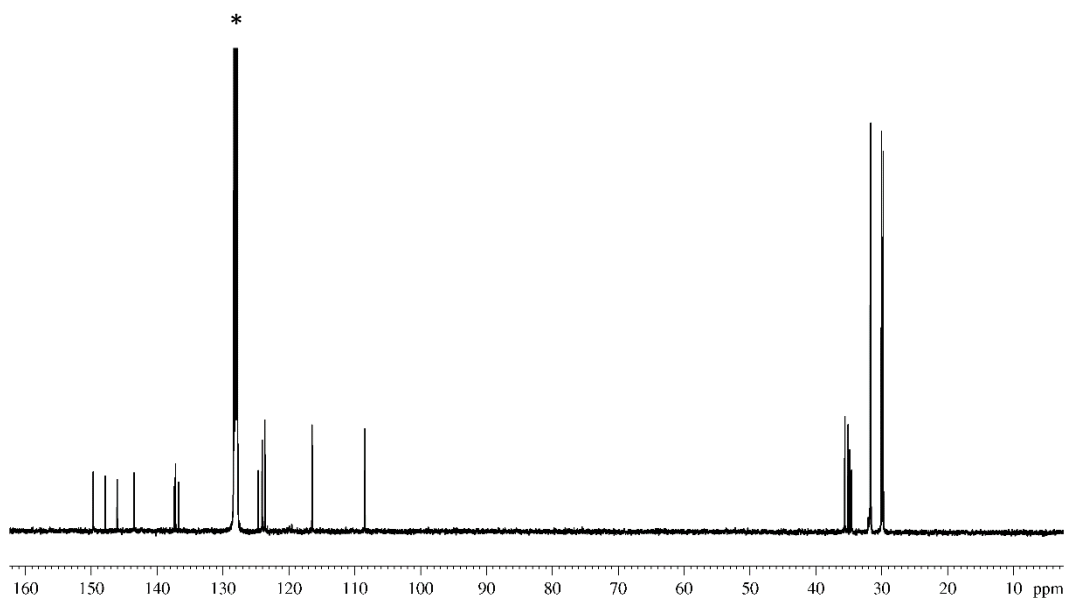

**Figure S49:**  $^{13}\text{C}\{^1\text{H}\}$  NMR spectrum of **8b** in  $\text{C}_6\text{D}_6$  at room temperature (\* denotes NMR solvent residue).

**NMR spectra for 9a**

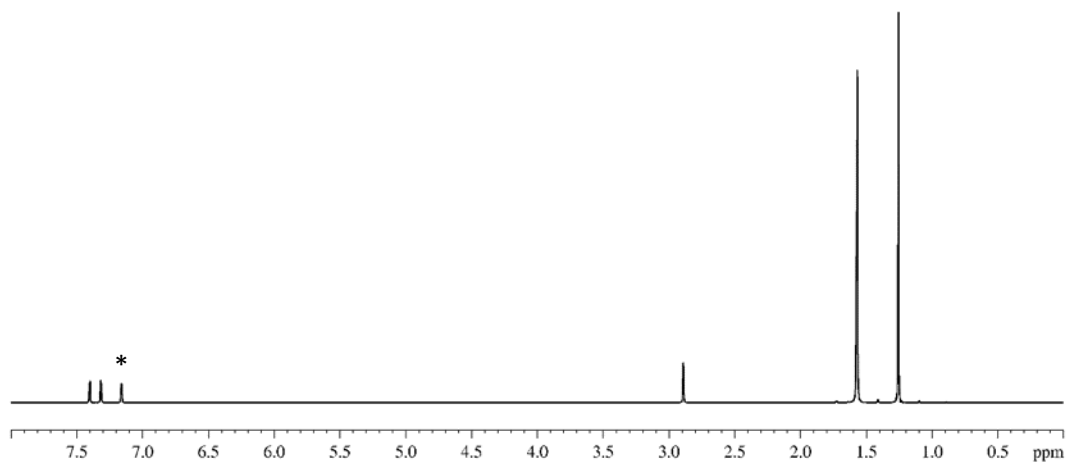

**Figure S50:**  $^1\text{H}$  NMR spectrum of **9a** in  $\text{C}_6\text{D}_6$  at room temperature (\* denotes NMR solvent residue).

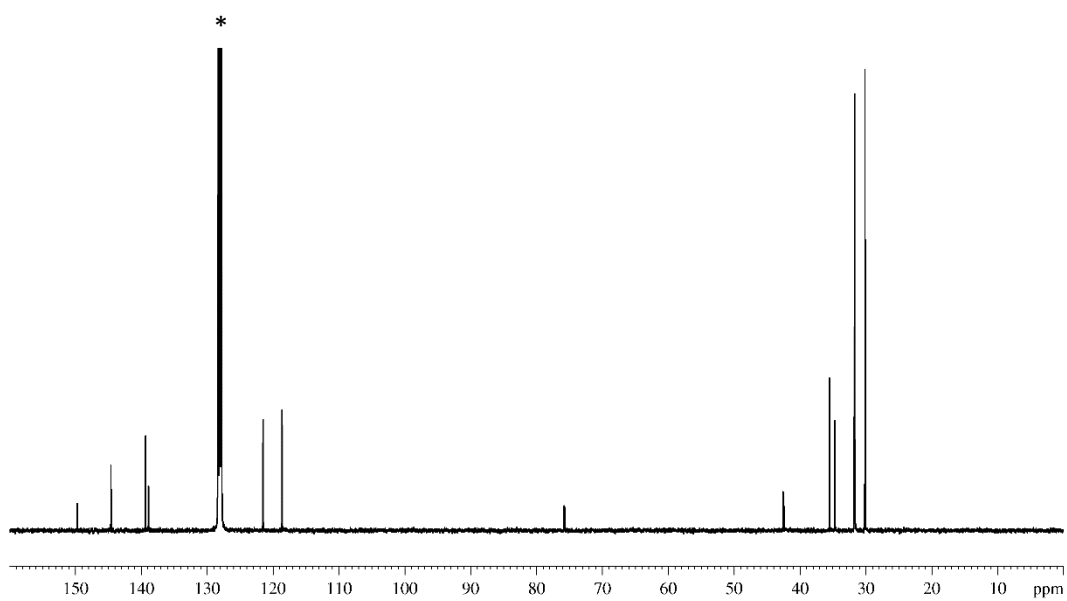

**Figure S51:**  $^{13}\text{C}\{^1\text{H}\}$  NMR spectrum of **9a** in  $\text{C}_6\text{D}_6$  at room temperature (\* denotes NMR solvent residue).

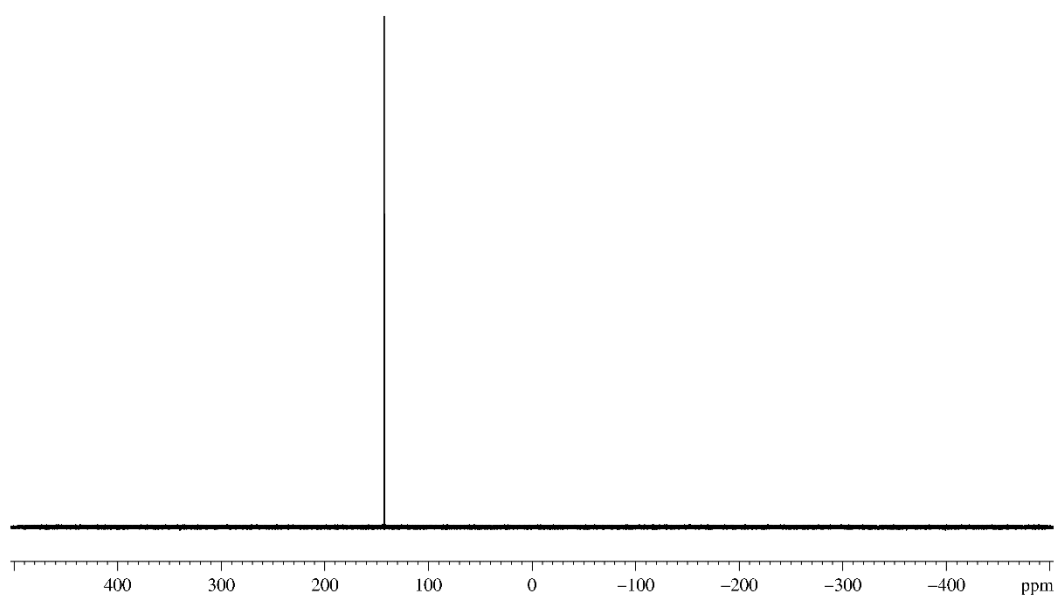

**Figure S52:**  $^{31}\text{P}$  NMR spectrum of **9a** in  $\text{C}_6\text{D}_6$  at room temperature.

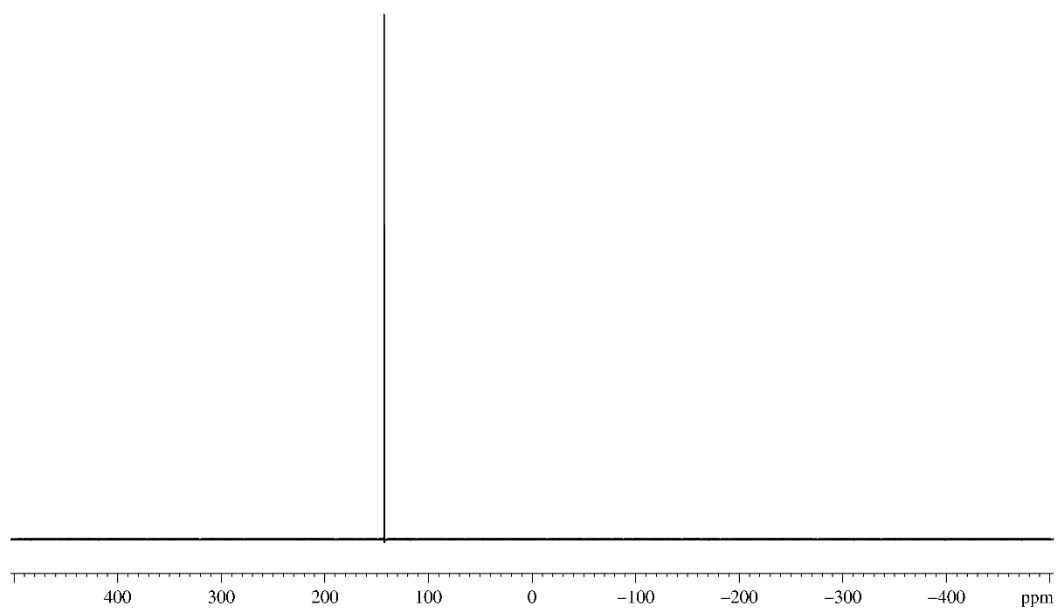

**Figure S53:**  $^{31}\text{P}\{^1\text{H}\}$  NMR spectrum of **9a** in  $\text{C}_6\text{D}_6$  at room temperature.

## NMR Spectra for 9b

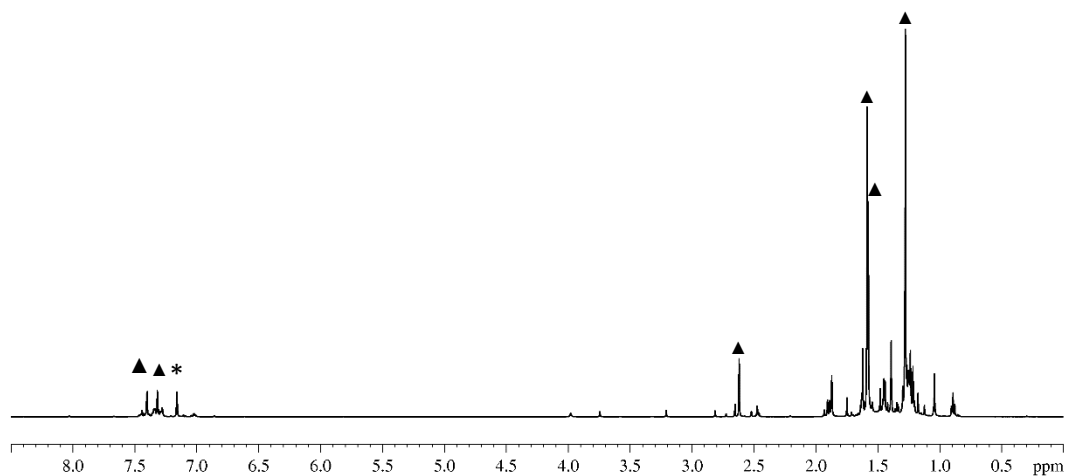

**Figure S54:** <sup>1</sup>H NMR spectrum of **9b** in C<sub>6</sub>D<sub>6</sub> at room temperature (\* denotes NMR solvent residue and ▲ denotes product resonances).

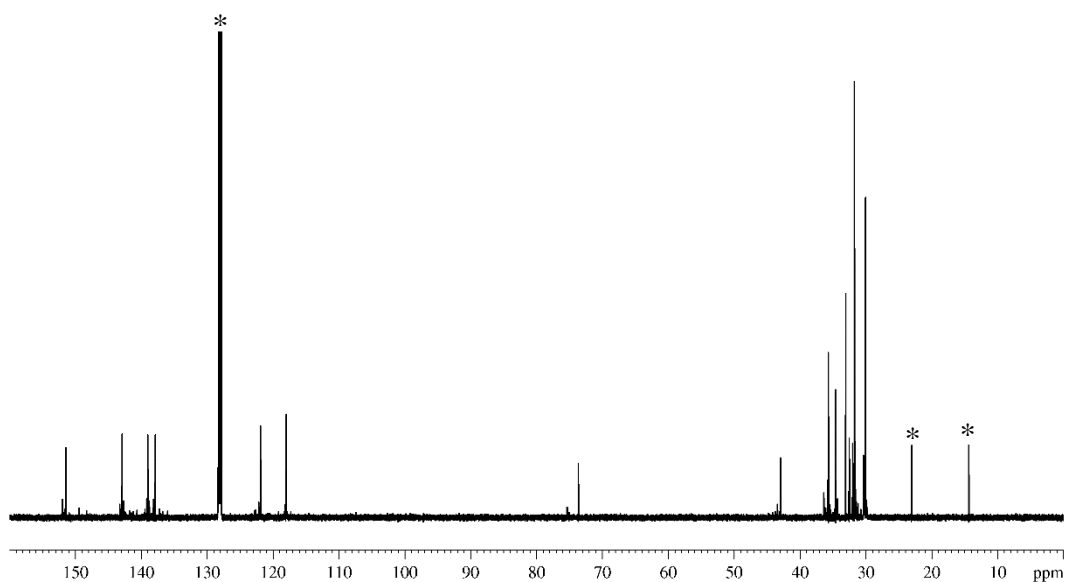

**Figure S55:** <sup>13</sup>C{<sup>1</sup>H} NMR spectrum of **9b** in C<sub>6</sub>D<sub>6</sub> at room temperature (\* denotes NMR solvent residue and hexane residue).

#### 4. MS spectra

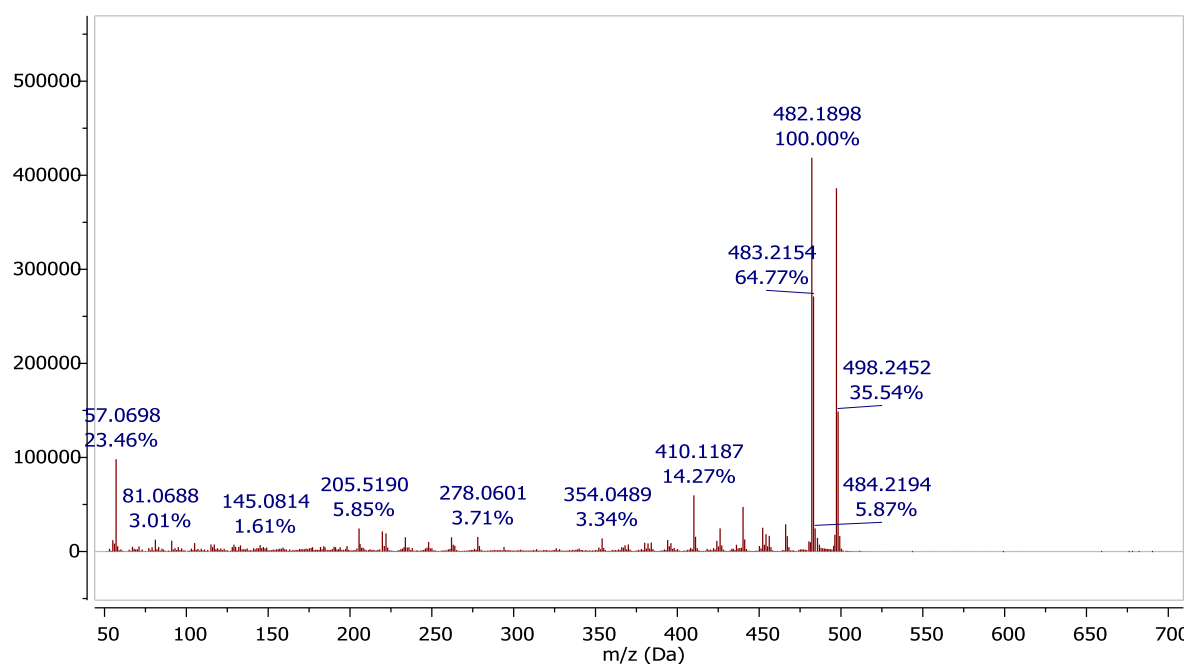

Figure S56: +ve Mode EI Mass spectrum of **1b**.

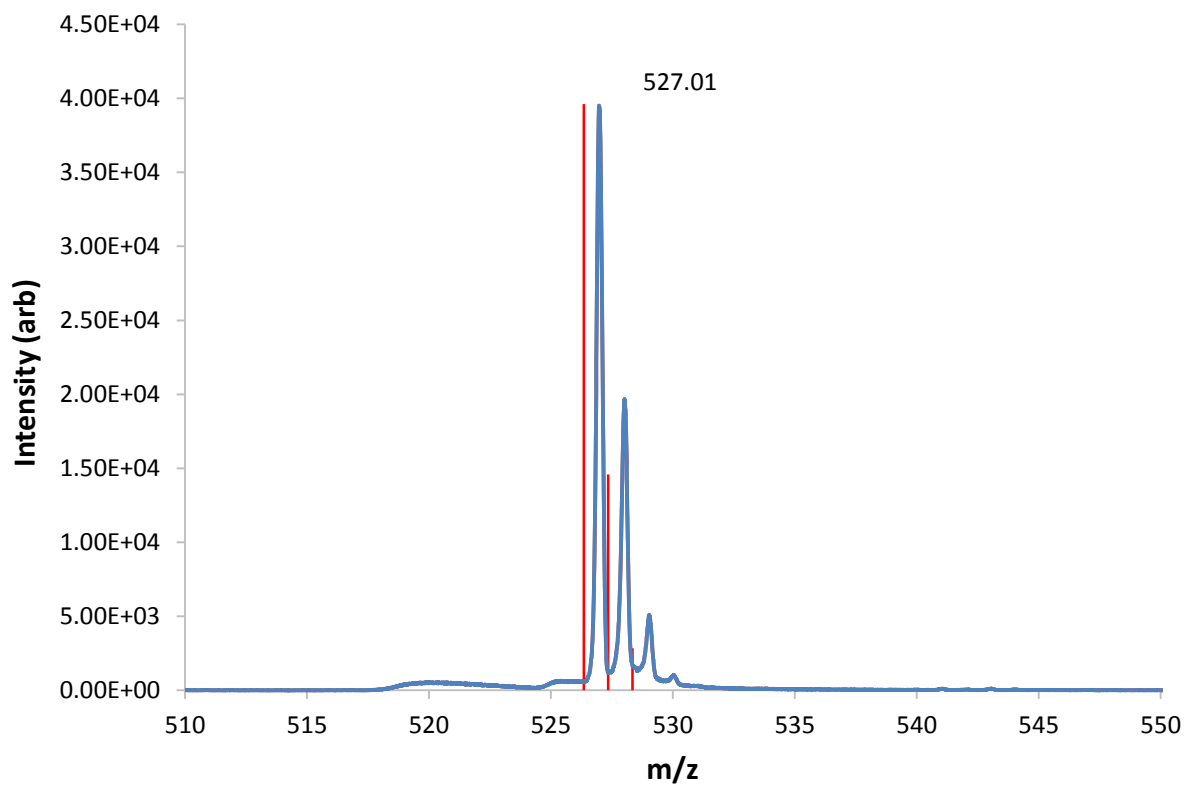

Figure S57: -ve Mode ESI Mass spectrum of **2a** recorded in DMF.

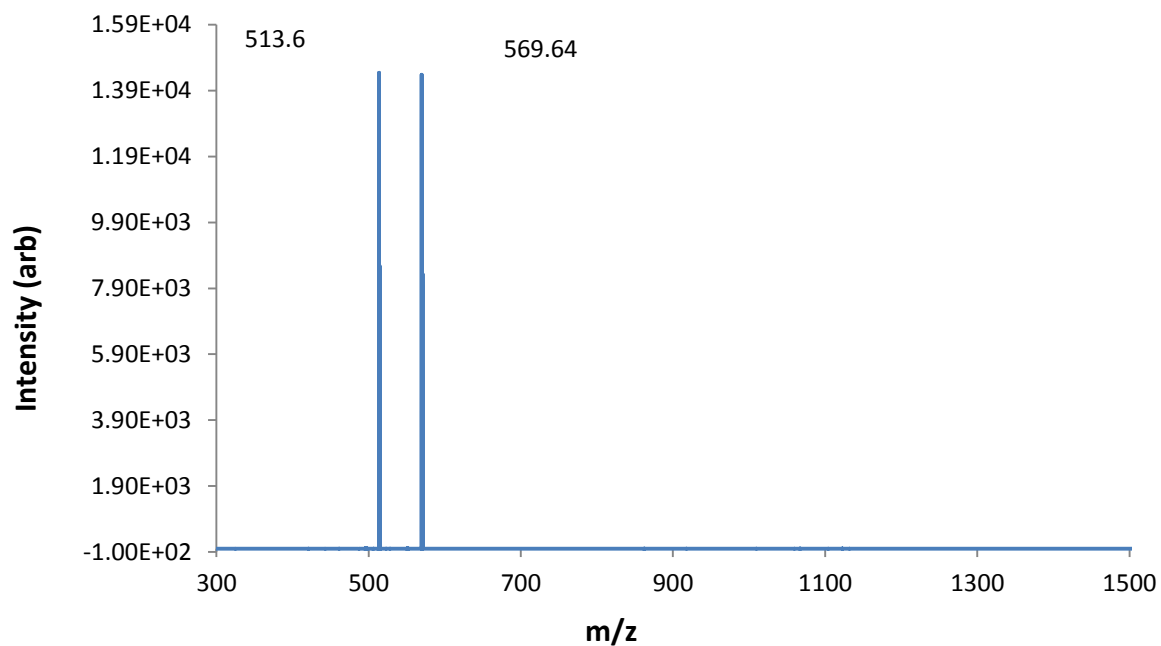

**Figure S58:** -ve Mode ESI Mass spectrum of **2b** recorded in DMF.

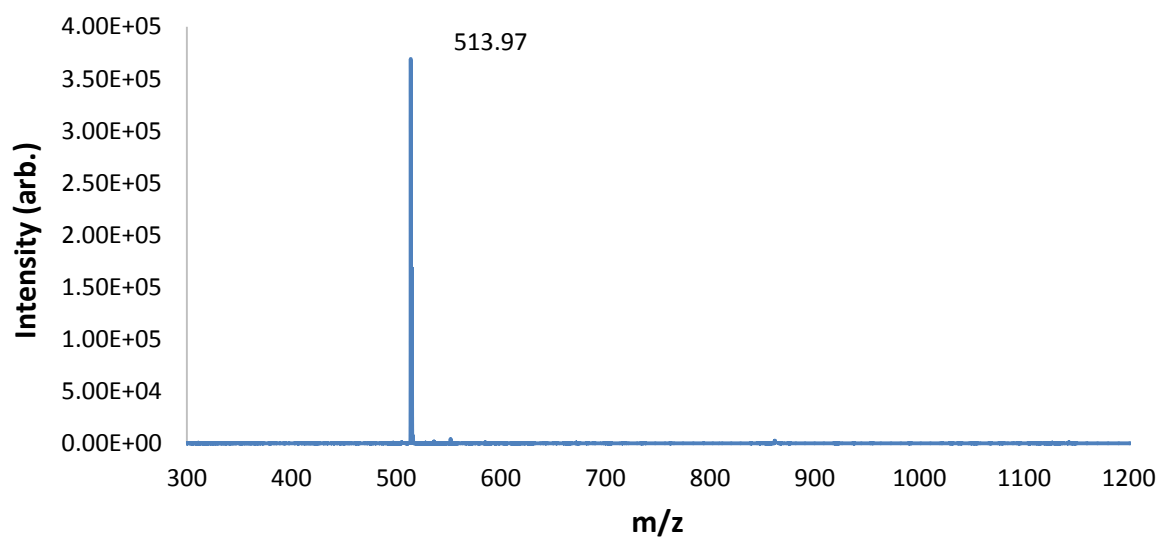

**Figure S59:** -ve Mode ESI Mass spectrum of **3b** recorded in DMF.

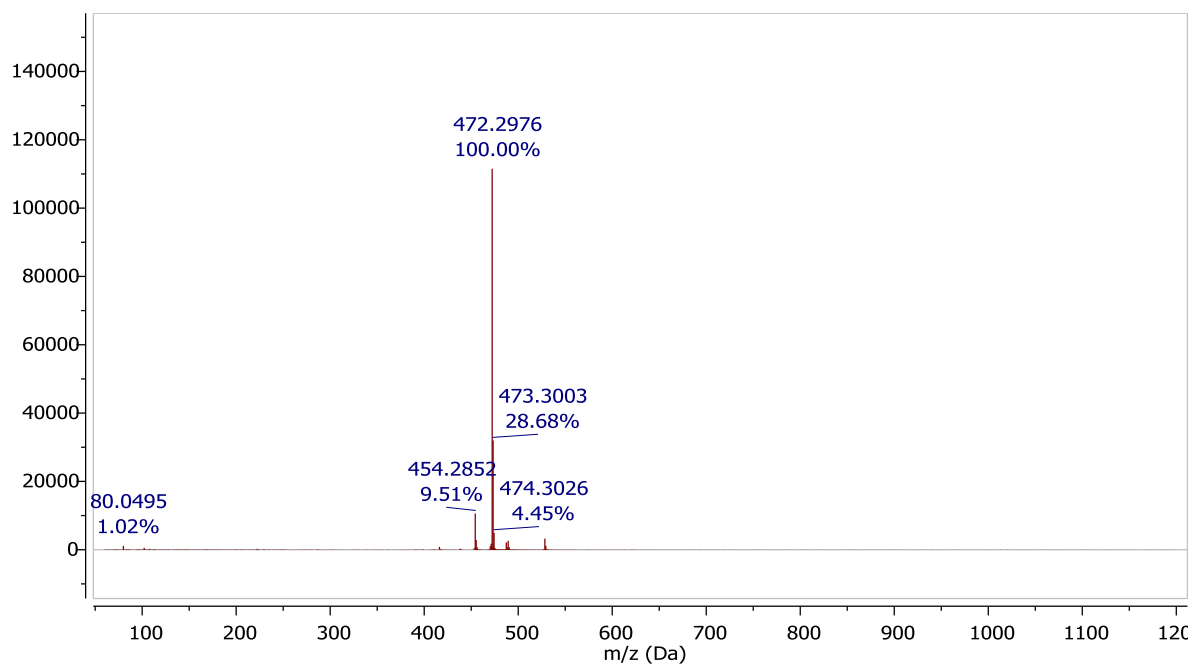

**Figure S60:** +ve Mode CI Mass spectrum of **4a** using NH<sub>3</sub> carrier gas.

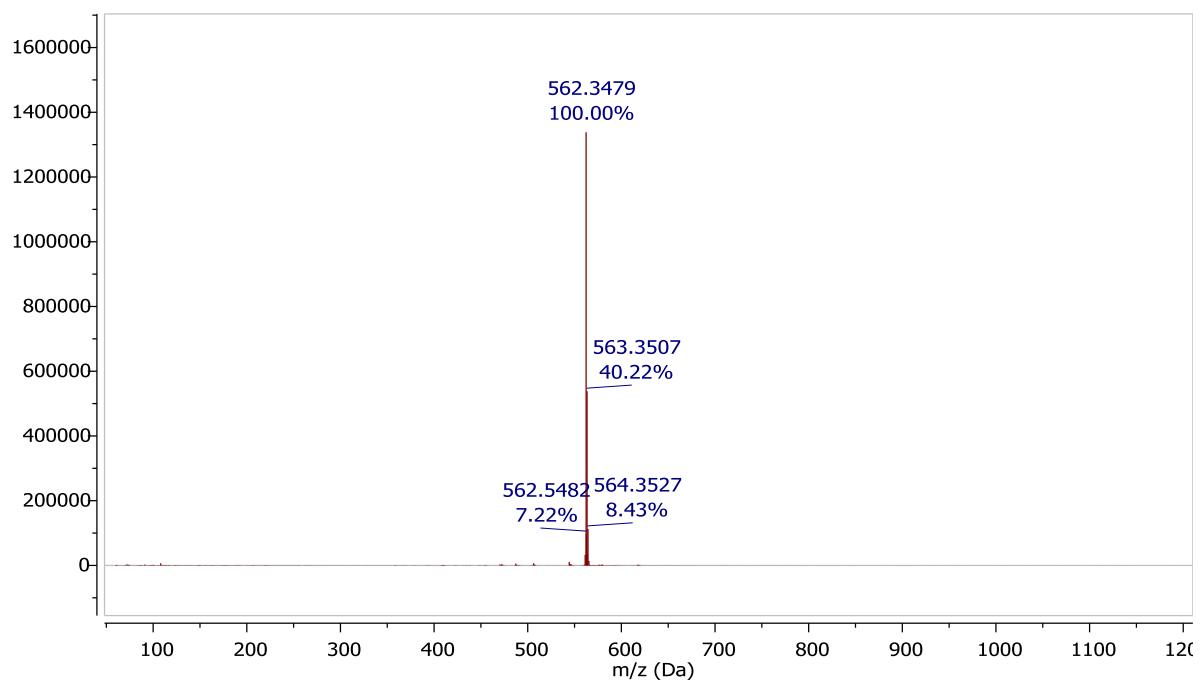

**Figure S61:** +ve Mode CI Mass spectrum of **5a** using NH<sub>3</sub> carrier gas.

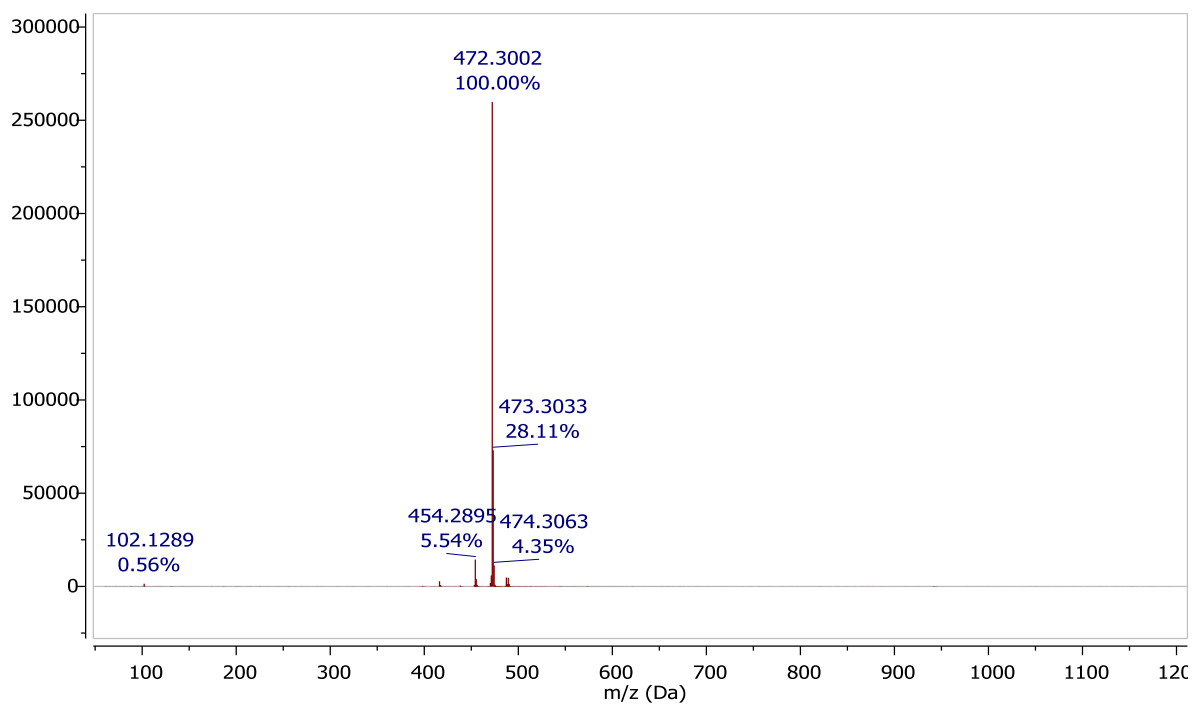

**Figure S62:** +ve Mode CI Mass spectrum of **6a** using NH<sub>3</sub> carrier gas.

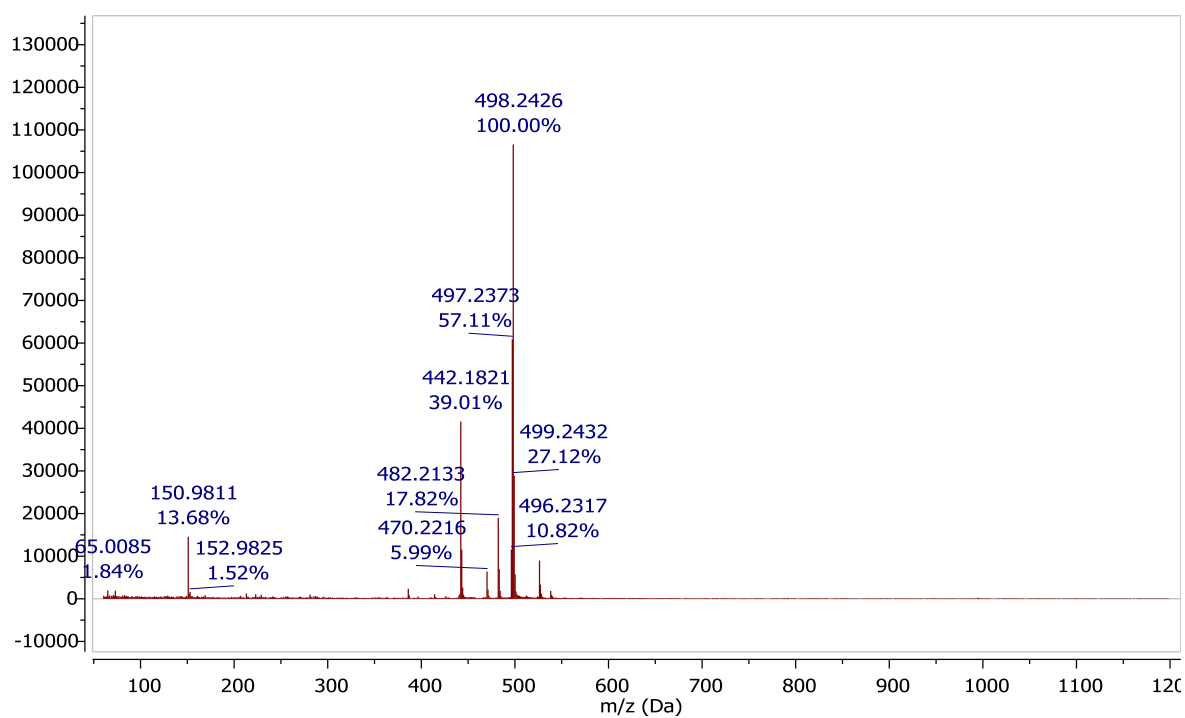

**Figure S63:** +ve Mode CI Mass spectrum of **6b** using CH<sub>4</sub> carrier gas.



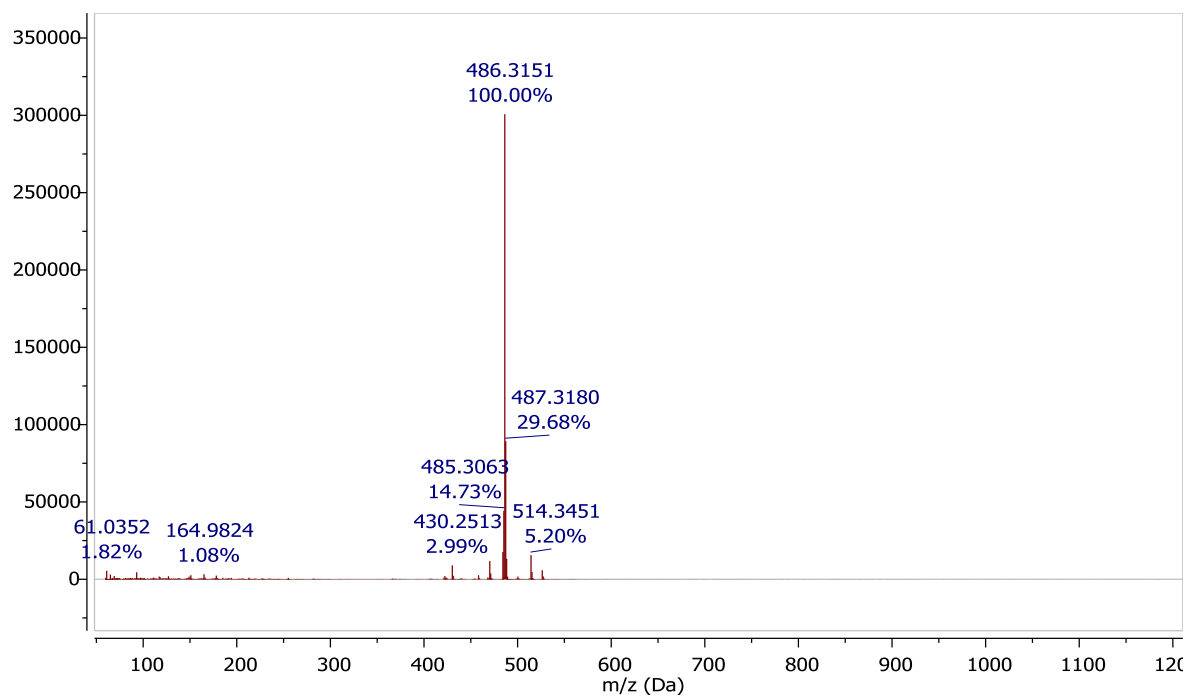

**Figure S64:** +ve Mode CI Mass spectrum of **7a** using NH<sub>3</sub> carrier gas.

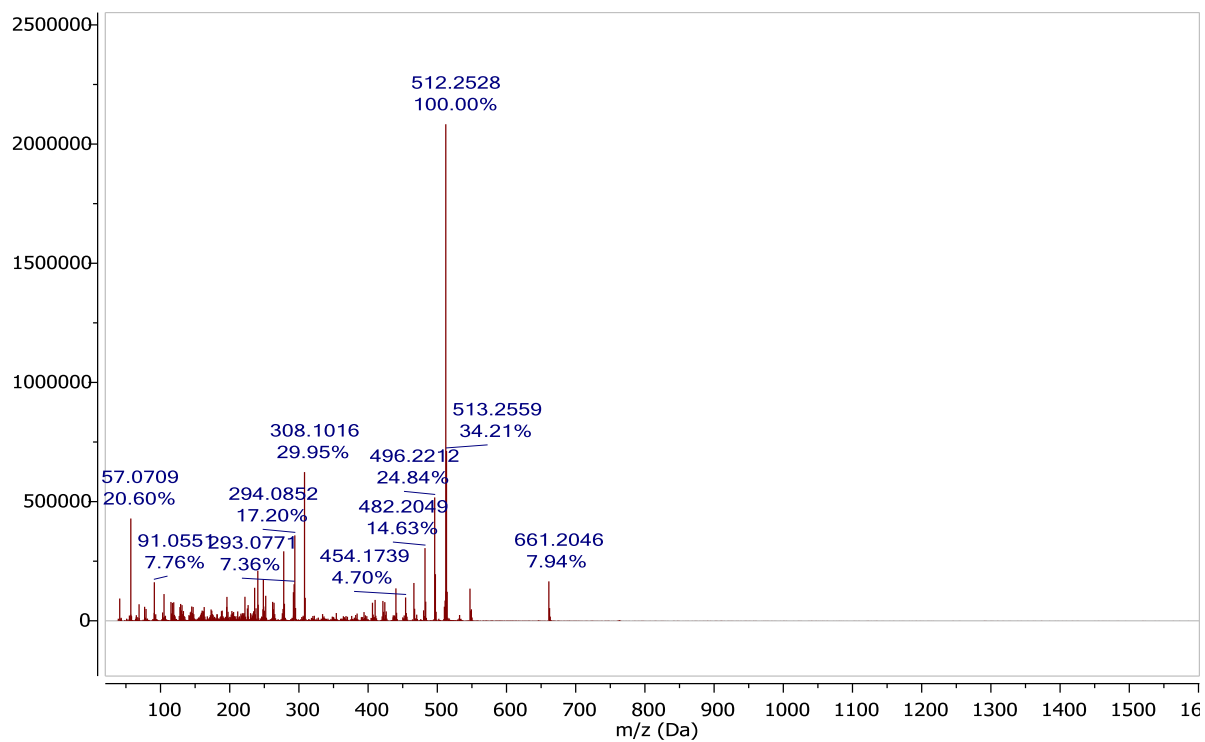

**Figure S65:** +ve Mode EI Mass spectrum of **7b**.

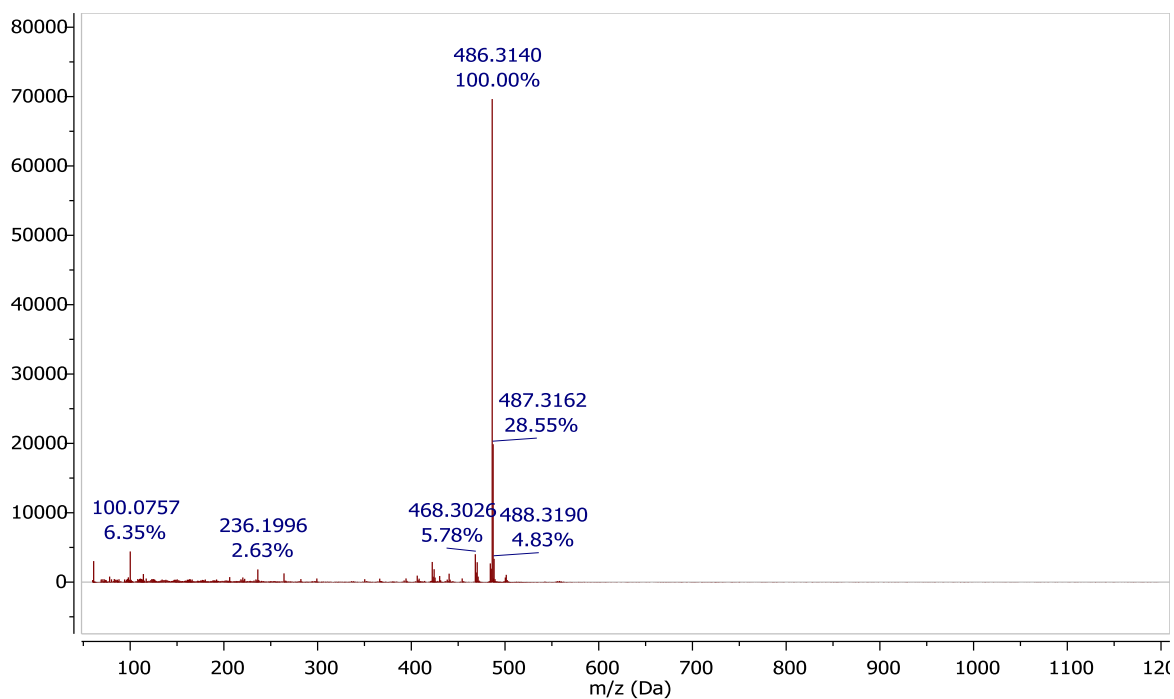

**Figure S66:** +ve Mode CI Mass spectrum of **9a** using NH<sub>3</sub> carrier gas.

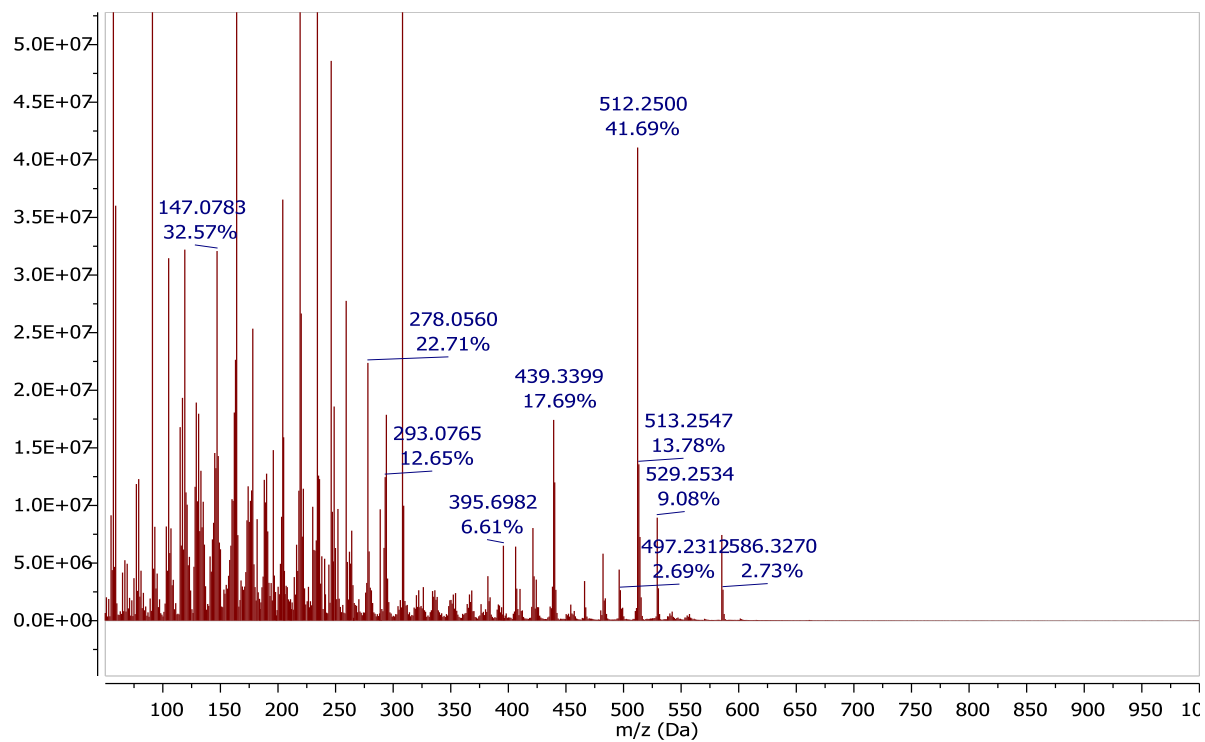

**Figure S67:** +ve EI Mass spectrum of **9b**.

- [1] a) G. te Velde, F. M. Bickelhaupt, E. J. Baerends, C. Fonseca Guerra, S. J. A. van Gisbergen, J. G. Snijders, T. Ziegler, *J. Comput. Chem.* **2001**, *22*, 931–967; b) C. Fonseca Guerra, J. G. Snijders, G. te Velde, E. J. Baerends, *Theor. Chem. Acc.* **1998**, *99*, 391–403; c) ADF2014.01, SCM, Theoretical Chemistry, Vrije Universiteit: Amsterdam, The Netherlands, <http://www.scm.com>.
- [2] A. D. Becke, *Phys. Rev. A* **1988**, *38*, 3098–3100.
- [3] J. P. Perdew, *Phys. Rev. B* **1986**, *33*, 8822–8824.
- [4] S. Grimme, J. Anthony, S. Ehrlich, and H. Krieg, *J. Chem. Phys.* **2010**, *132*, 154104–154119.
- [5] L. Versluis, T. Ziegler, *J. Chem. Phys.* **1988**, *88*, 322–328.
